## Current Bibliography

Prepared by A. R. MARGETTS

**N**OTE. The scope of the Bibliography is limited in the main to the area covered by the Council's activities, but there are included papers of general interest relating to other areas in North Temperate and Arctic regions and exceptionally elsewhere. Limnological references are not as a rule given but papers relating to brackish waters and to salmon and freshwater fish studied by the Council are included.

Subscribers and those on the distribution list will receive regularly upon application to the General Secretary copies of the Bibliography printed on one side of the page only, for use in making up card indices.

The Editor will be glad to be advised of emendations and additions to the Bibliography.

---

### 1) General Oceanography and Fisheries

#### 1) a Expeditions

- CHRISTIANSSON, E. T. "How the 'Albatross' became a research vessel". Rep. Swedish Deep-Sea Exped. 1947-1948, **1** (2): 125-42. Göteborg, 1957.
- JERLOV, N. G., *et al.* "Winches and laboratories". Rep. Swedish Deep-Sea Exped. 1947-1948, **1** (3): 143-59. Göteborg, 1957.
- PETTERSSON, H. "The voyage". Rep. Swedish Deep-Sea Exped. 1947-1948, **1** (1): 1-123. Göteborg, 1957.
- PICARD, J., & DIETZ, R. S. "Oceanographic observations by the bathyscaph 'Trieste' (1953-1956)". Deep-Sea Res., **4**: 221-29. London & New York, 1957.
- STOYANOV, I. A. "A research vessel of small tonnage". Trudy Inst. Okeanol., Akad. Nauk SSSR, **19**: 340-47. Moscow, 1956.

#### 1) b Navigation

- BUSCH, Dr. "Atlas-radiolog, a radio position finder equipment for depth surveying". Internat. Hydrogr. Rev., **34** (2): 57-61. Monaco, 1957.

#### 1) c Institutes

- ANON. "Report of the Hydraulics Research Board with the report of the director of hydraulics research for the year 1954". HMSO, London, 1955.
- ANON. "Report of the Hydraulics Research Board with the report of the director of hydraulics research for the year 1955". HMSO, London, 1956.
- ANON. "The National Research Council review 1956". Ottawa, 1956.
- ANON. "The United States National Museum annual report for the year ended June 30, 1957". Washington, 1957.

- ANON. "Hydraulics Research 1956. Report of the Hydraulics Research Board with the report of the director of hydraulics research". HMSO, London, 1957.
- ANON. "Government of India, Central Marine Fisheries Research Station, Mandapam Camp – annual report of the chief research officer for the year ended 31st March 1956". *Indian J. Fish.*, 4 (2): 387–418. Bangalore, 1957.
- ANON. "1956 annual report (66th) for the State of Washington Department of Fisheries". Washington, 1957.
- ANON. "Vattenstånden vid Sveriges kuster". *Sveriges Meteorol., Hydrol. Inst.*, 1954, 36. Stockholm, 1957.
- ANON. "National Oceanographic Council. Annual report 1956–57". Cambridge Univ. Press, 1957.
- ANON. "Review of the National Research Council 1957". Ottawa, 1957.
- ANON. "Annual report of the Inter-American Tropical Tuna Commission, 1956". La Jolla, Calif., 1957.
- ANON. "Annual report of the Central Inland Fisheries Research Station, Calcutta, for the year 1955–56". *Indian J. Fish.*, 4 (2): 419–46. Bangalore, 1957.
- ANON. "Provincial Department of Fisheries report with appendices for the year ended December 31st 1956". Victoria, B. C., 1957.
- ANON. "Annual report of the Fisheries Research Board of Canada 1956–1957". Ottawa, 1957.
- ANON. "Annual report of the Board of Regents of the Smithsonian Institution for the year ended June 30, 1956". Washington, 1957.
- ANON. "Annual report for the fiscal year 1956–1957". Florida State Univ., Oceanogr. Inst., Tallahassee, 1958.
- ANON. "East African Fisheries Research Organization 1956/1957". East Africa High Commiss., Jinja, 1958.
- ANON. "Annual report of the Federal Fisheries Service for the year 1956–57". Lagos, Nigeria, 1958.
- DMITRIEV, N. A. "Results of the investigations in the White Sea in 1951–1952". Materials for a complex study of the White Sea, 1: 7–14. Moscow, 1957.
- DOODSON, A. T. "Annual report for 1957 of the Liverpool Observatory and Tidal Institute". Liverpool, 1958.
- MARCHAND, J. M. "Twenty-seventh annual report for the period 1st April, 1955 to 31st March, 1956". Div. Fish. Dept. Commer. & Industr., Union South Africa, Cape Town, 1957.
- PICOTTI, M., & PELLI, S. "Annuario 1956". *Pubbl. Ist. Speriment. Talassogr. Trieste*, 340. Trieste, 1957.

#### 1) d General Phenomena

- BEKLEMISHEV, K. V. "Sound dispersing strata and the vertical distribution of zooplankton and fish in the sea". *Uspekhi Sovrem. Biol.*, 41 (1): 90. Moscow, 1956.
- BARHAM, E. G. "The ecology of sonic scattering layers in the Monterey Bay area, California". *Dissert. Abstr.*, 17 (7): 1626–27. Ann Arbor, Mich., 1957.
- DIETZ, R. S., & SHERRY, M. J. "Transpacific detection of Myojin volcanic explosions by underwater sound". *Bull. Geol. Soc. America*, 65: 941–56. New York, 1954.
- GRIFFITHS, J. W. R., & PRYOR, A. W. "Underwater acoustic echo-ranging". *Electronic & Radio Engin.*, 1958 (January). 1958.
- HASHIMOTO, T., *et al.* "Propagation characteristic of 1 Mc ultrasonic sound in sea water". *Techn. Rep. Fish. Boat*, 11: 121–42. Tokyo, 1958.
- HASHIMOTO, T., & MANIWA, Y. "Study of DSL by ultrasonic wave (2)". *Techn. Rep. Fish. Boat*, 9: 209–16. Tokyo, 1956.
- HASHIMOTO, T., MANIWA, Y., & NISHIMURA, M. "Propagation characteristics of high frequency ultrasound in sea water". *Techn. Rep. Fish. Boat*, 8: 103–12. Tokyo, 1956.
- HASHIMOTO, T., NISHIMURA, M., & MANIWA, Y. "Noise of yellowtail when it comes into the set net – relation between the noise and amount of catch – relation between the intensity of noise and weather". *Techn. Rep. Fish. Boat*, 10: 69–78. Tokyo, 1957.
- STEINBERG, R. "Unterwassergeräusche und Fischerei". *Protok. Fischereitechn.*, 4 (21): 216–49. Hamburg, 1957.

#### 1) e General Apparatus

- PERMITIN, J. E. "Experimental biological observation with underwater television apparatus". *Trudy Inst. Okeanol., Akad. Nauk SSSR*, 19: 319–23. Moscow, 1956.

- VERSHINSKII, N. V. "Underwater television". Vestn. Akad. Nauk SSSR, 1955 (11). Moscow, 1955.
- VERSHINSKII, N. V., & MARAKUEV, V. I. "Underwater television apparatus". Trudy Inst. Okeanol., Akad. Nauk SSSR, 19: 312-18. Moscow, 1956.

### 1) f General Textbooks

- ROUCH, J. "Les océans". Armand Colin, Paris, 1957.

## 2) Physical Oceanography

### 2) a Practical Aspects

- ANDERSON, W. W., & GEHRINGER, J. W. "Physical oceanographic, biological, and chemical data south Atlantic coast of the United States M/V 'Theodore N. Gill' cruise 4". US Dept. Inter., Fish & Wildl. Serv., Spec. Sci. Rep.-Fish., 234. Washington, 1957.
- ANON. "Oceanographic data processing by automatic methods". US Navy Hydrogr. Off., Div. Computation. Washington, 1955.
- ANON. "Machine tabulation of oceanographic data". US Navy Hydrogr. Off., Study, 111. Washington, 1956.
- ANON. "Meteorologische en oceanografische waarnemingen verricht aan boord van Nederlandse lichtschepen in de Noordzee. Jaargang 5 - 1953". Kon. Nederlands Meteorol. Inst., De Bilt, 1957.
- ANON. "Meteorologische en oceanografische waarnemingen verricht aan boord van Nederlandse lichtschepen in de Noordzee. Jaargang 6 - 1954". Kon. Nederlands Meteorol. Inst., De Bilt, 1956.
- ANON. "Meteorologische en oceanografische waarnemingen verricht aan boord van Nederlandse lichtschepen in de Noordzee. Jaargang 7 - 1955". Kon. Nederlands Meteorol. Inst., De Bilt, 1956.
- ANON. "Meteorologische en oceanografische waarnemingen verricht aan boord van Nederlandse lichtschepen in de Noordzee. Jaargang 8 - 1956". Kon. Nederlands Meteorol. Inst., De Bilt, 1957.
- ANON. "Hydrographical observations on Swedish lightships in 1956". Rep. Fish. Board Sweden, Ser. Hydrogr., 9. Göteborg, 1957.
- ANON. "Observations hydrologiques des bâtiments de la Marine Nationale: Aviso 'Ailette' - Observations de surface (1957)". Bull. Inform. (COEC), 10 (3): 165-77. Paris, 1958.
- ANON. "Determination of age of oceanic waters". IUGG Chron., 9: 11. Paris, 1958.
- ANON. "Observations océanographiques des navires stationnaires météorologiques". Trav. Centre Rech. et Étud. Océanogr., N. S., 3 (1): 51-58. Paris, 1958.
- ANON. "Observations hydrologiques des bâtiments de la Marine Nationale: Aviso 'Ailette' (entrée de la Manche, mer d'Irlande, mer du Nord, mer de Norvège, mer de Barentz - 1956)". Bull. Inform. (COEC), 10 (2): 100-08. Paris, 1958.
- BUMPUS, D. F. "Oceanographic observations, 1956, east coast of the United States". US Dept. Inter., Fish & Wildl. Serv., Spec. Sci. Rep.-Fish., 233. Washington, 1957.
- BUMPUS, D. F., & Day, C. D. "Drift bottle records for Gulf of Maine and Georges Bank, 1931-56". US Dept. Inter., Fish & Wildl. Serv., Spec. Sci. Rep.-Fish., 242. Washington, 1957.
- BURKOV, V. A. "About the security of given depth of the hydrological observations". Trudy Inst. Okeanol., Akad. Nauk SSSR, 25: 55-61. Moscow, 1957.
- BURKOV, V. A., & Petelin, V. F. "The experience of conducting the complex oceanographic works in the regions of big depths". Trudy Inst. Okeanol., Akad. Nauk SSSR, 25: 3-6. Moscow, 1957.
- EMILSSON, I., "Relatorio e resultados fisico-quimicos de tres cruzeiros oceanograficos em 1956". Contr. Avulsas Inst. Oceanogr., 1. São Paulo, 1956.
- FUGLISTER, F. C. "Oceanographic data from 'Crawford' Cruise 10 obtained for the International Geophysical Year of 1957-58". Publ. Woods Hole Oceanogr. Inst., 57-54. Woods Hole, Mass., 1957.
- HELA, I., & KOROLEFF, F. "Hydrographical and chemical data collected in 1957 on board the R/V 'Aranda' in the Barents Sea". Merentut. Julk., 179. Helsinki, 1958.
- HORTON, J. W. "Fundamentals of sonar". US Naval Inst., Annapolis, 1957.
- MARGALEF, R. "Determinación continúa a través de cable de características fisicoquímicas del agua". Inst. Invest. Pesqu., Reunión Product. y Pesqu., 3: 98-101. Barcelona, 1957.
- UDINTSEV, G. B. "On the question of correction of depths recorded with echo sounders". Trudy Inst. Okeanol., Akad. Nauk SSSR, 8: 305-14. Moscow, 1954.

## 2) c Submarine Topography

- ANON. "Arctic Ocean submarine ridges". IGY Bull., 5. Trans. American Geophys. Union, **38** (6): 1016–19. Washington, 1957.
- AVILOV, I. K. "A new texture from marine sediments". Doklady Akad. Nauk SSSR, **118** (6): 1155–57. Moscow, 1958.
- BERTHOIS, L. "Recherches sur les sédiments de la Mer du Nord et de la Mer d'Irlande". Rev. Trav. Inst. Pêch. Marit., **21** (4): 485–554. Paris, 1957.
- BERTHOIS, L., & PORTIER, J. "Influence du facteur quantitatif dans le façonnement des grains de sable quartzeux". CR Acad. Sci., **246** (5). Paris, 1958.
- BLANC, J. J. "Études sur le seuil Siculo-Tunisien. 3. Sédimentologie sous-marine du Détroit Siculo-Tunisien". Ann. Inst. Océanogr., **34**: 91–126. Paris, 1958.
- BLANC, J. J. "Campagne 1955 en Méditerranée nord-orientale. 1. Recherches géologiques et sédimentologiques". Ann. Inst. Océanogr., **34**: 157–211. Paris, 1958.
- BLANC, J. J. "Recherches de sédimentologie littorale et sous-marine en Provence occidentale". Ann. Inst. Océanogr., **35** (1). Paris, 1958.
- BORDOVSKII, O. K. "Studies in the consistency of some contemporary marine deposits". Trudy Inst. Okeanol., Akad. Nauk SSSR, **17**: 137–40. Moscow, 1956.
- BOURCART, J. "Rapport sur une mission effectuée à bord de la 'Calypso' en mai 1957". Bull. Inform. (COEC), **10** (4): 188–91. Paris, 1958.
- BOURCART, J., LALOU, C., & GENNESSEUX, M. "Le relief sous-marin du précontinent entre le Rhône et La Ciotat". Bull. Inform. (COEC), **10** (3): 144–52. Paris, 1958.
- BULLARD, E. C. "The floor of the ocean". Mem. & Proc. Manchester Liter. & Philos. Soc., **97** (2). Manchester, 1957.
- CURL, H. "Changes in bottom topography off Alligator Harbor since 1889". Quart. J. Florida Acad. Sci., **20** (3). Gainesville, 1957.
- DEVDAIANI, A. S. "Methoden zur direkten Messung der Mächtigkeit alluvialer Schichten und Sedimente". Izvest. Akad. Nauk SSSR, Ser. Geogr., 1956 (4): 103. Moscow, 1956.
- GORSHKOVA, T. I. "Natural moisture, carbonates and organic matter in sediments as indices of the conditions of deposition". Trudy Inst. Okeanol., Akad. Nauk SSSR, **17**: 141–47. Moscow, 1956.
- HASHIMOTO, T., & NISHIMURA, M. "Reliability of record for the shape of sea bottom obtained by ultrasonic echo-sounder". Techn. Rep. Fish. Boat, **6**: 105–12. Tokyo, 1955.
- HULINGS, N., & OLSON, F. C. W. "Subsurface beach sands of Alligator Harbor". Quart. J. Florida Acad. Sci., **18** (4). Gainesville, 1955.
- JARKE, J. "Jahresversammlung der geologischen Vereinigung vom 15. bis 18. März 1957 in Wiesbaden: Das Meer in Gegenwart und Vergangenheit". Deutsche Hydrogr. Zeitschr., **10** (3): 109–11. Hamburg, 1957.
- JONIN, A. S., & DOLOTOV, I. S. "Characteristics of the dynamics and morphology of raising coasts illustrated on the example of the Novaya Zemlya". Trudy Inst. Okeanol., Akad. Nauk SSSR, **28**: 71–84. Moscow, 1958.
- KANAEV, V. F. "Bottom bathymeters and their use in oceanographical studies". Trudy Inst. Okeanol., Akad. Nauk SSSR, **19**: 164–68. Moscow, 1956.
- KITANO, K. "A possible interpretation of the warm core and the cold low-salinity layer". Bull. Hokkaido Reg. Fish. Res. Lab., **17**: 103–10. Hokkaido, 1958.
- KOCZY, F. F., TOMIC, E., & HECHT, F. "Zur Geochemie des Urans im Ostseebecken". Geochim. et Cosmochim. Acta, **11**: 86–102. London, 1957.
- KUDINOV, E. I. "Vibro-piston core sampler". Trudy Inst. Okeanol., Akad. Nauk SSSR, **25**: 143–52. Moscow, 1957.
- LEENHARDT, O. "Premiers résultats séismiques déduits d'expériences de la Marine Nationale près de Toulon". Trav. Centre Rech. et Étud. Océanogr., **2** (12). Paris, 1955.
- LISITSYN, A. P. "Suspended particles in the atmosphere and ocean as initial material for the study of marine sediments". Trudy Inst. Okeanol., Akad. Nauk SSSR, **13**: 16–22. Moscow, 1955.
- LISITSYN, A. P. "Treatment of the results of mechanical analysis of marine sediments". Trudy Inst. Okeanol., Akad. Nauk SSSR, **19**: 262–87. Moscow, 1956.
- LISITSYN, A. P., & KANAEV, V. F. "Mechanical analysis of coarsely broken material under field conditions". Trudy Inst. Okeanol., Akad. Nauk SSSR, **19**: 252–61. Moscow, 1956.
- LISITSYN, A. P., & PETELIN, V. P. "A method for preliminary treatment of samples of marine sediments under field conditions". Trudy Inst. Okeanol., Akad. Nauk SSSR, **19**: 240–51. Moscow, 1956.
- LOMBARD, A. "Géologie sédimentaire. Les séries marines". Masson et Cie, Paris, 1956.

- LUFBURROW, R. A. "Bottom topography from 'Crawford' Cruise 10 obtained for the International Geophysical Year of 1957-58". Publ. Woods Hole Oceanogr. Inst., 57-60. Woods Hole, Mass., 1957.
- OSTROUMOV, E. A., *et al.* "Method for determining rare earths in marine deposits". Trudy Inst. Okeanol., Akad. Nauk SSSR, 19: 297-303. Moscow, 1956.
- PETELIN, V. P. "A laboratory reducer for the sand-aleuritic fraction". Trudy Inst. Okeanol., Akad. Nauk SSSR, 19: 288-90. Moscow, 1956.
- PETELIN, V. P., & FOTIEV, A. V. "A harmless heavy liquid for laboratory geological work". Trudy Inst. Okeanol., Akad. Nauk SSSR, 19: 291-93. Moscow, 1956.
- SAUDOVA, H. M. "Method for separating foraminifera from bottom deposits". Trudy Inst. Okeanol., Akad. Nauk SSSR, 19: 294-96. Moscow, 1956.
- SHISHKINA, O. V. "Method for obtaining marine silt waters and studying their salt content". Trudy Inst. Okeanol., Akad. Nauk SSSR, 17: 148-75. Moscow, 1956.
- SHULJACK, B. A. "Contributions to ripple-mark dynamics in the coastal zone". Trudy Inst. Okeanol., Akad. Nauk SSSR, 28: 59-70. Moscow, 1958.
- SMITH, W. O. "Recent underwater surveys using low-frequency sound to locate shallow bedrock". Bull. Geol. Soc. America, 69: 69-98. New York, 1958.
- STRIDE, A. H., & CARTWRIGHT, D. E. "Sand transport at southern end of the North Sea". Dock & Harb. Auth., 38 (447). London, 1958.
- SUTTON, G. H., BERCKHEMER, H., & NAFE, J. E. "Physical analysis of deep sea sediments". Geophysics, 22: 779-812. Tulsa, Okl., 1957.
- SYSOEV, N. M. "Rational construction of a free-fall soil tube". Trudy Inst. Okeanol., Akad. Nauk SSSR, 19: 238-39. Moscow, 1956.
- THOMAS, H. C. "Chemical detection of ferrous objects in the sea". Techn. Rep. Edwards Street Lab., Yale Univ., 47. USA, 1956.
- TUREKIAN, K. K. "Rapid technique for determination of carbonate content of deep-sea cores". Bull. American Assoc. Petrol. Geol., 40 (10): 2507. Tulsa, Okl., 1956.
- UDINTSEV, G. B. "Deciphering echograms". Trudy Inst. Okeanol., Akad. Nauk SSSR, 19: 169-94. Moscow, 1956.
- UDINTSEV, G. B. "The comparison of soundings". Trudy Inst. Okeanol., Akad. Nauk SSSR, 19: 195-203. Moscow, 1956.
- UDINTSEV, G. B. "About the corrections at the sound velocity according to the depths, measured by the echo-sounder". Trudy Inst. Okeanol., Akad. Nauk SSSR, 25: 115-17. Moscow, 1957.
- UDINTSEV, G. B., *et al.* "Construction of a piston tube with automatic sterilization of the piston". Trudy Inst. Okeanol., Akad. Nauk SSSR, 19: 232-37. Moscow, 1956.
- WILLIAMS, J. "The sediment probe". Techn. Rep. Chesapeake Bay Inst., 10 (56-3). Baltimore, 1956.
- ZENKOVITCH, V. P. "On methods of direct observations of sediment bottom-drifting in the sea". Trudy Inst. Okeanol., Akad. Nauk SSSR, 28: 56-58. Moscow, 1958.

## 2) d Sea Water, Physics

- ANON. "Bilan colorifique de l'océan". Bull. Liaison Nav. Sélect., 16: 4. Paris, 1957.
- ANON. "First sea surface gravimeter". IGY Bull., 8. Trans. American Geophys. Union, 39 (1): 175-78. Washington, 1958.
- VON ARX, W. "An experimental approach to problems in physical oceanography". Progr. Phys. & Chem. Earth, 2: 1-29. 1957.
- DEACON, E. L., SHEPARD, P. A., & WEBB, E. K. "Wind profiles over the sea and the drag at the sea surface". Australian J. Phys., 9 (4): 511. 1956.
- DEACON, G. E. R. "Marine physics. James Forest Lecture". Proc. Inst. Civil Engin., 5 (1): 661-76. London, 1956.
- LE GRAND, Y. "Sur quelques recherches d'absorption et de diffusion de la lumière dans l'atmosphère et dans la mer". J. Phys. et Radium, 17 (6). Paris, 1956.
- GREENSPAN, M., & TSCHIEGG, C. F. "Speed of sound in water by a direct method". J. Res. Nation. Bur. Standards, 59 (4). Washington, 1957.
- HASHIMOTO, T., *et al.* "Propagation characteristic of 1 Mc ultrasonic sound in sea water". Techn. Rep. Fish. Boat, 11: 121-42. Tokyo, 1958.
- HASHIMOTO, T., MANIWA, Y., & NISHIMURA, M. "Propagation characteristics of high frequency ultrasound in sea water". Techn. Rep. Fish. Boat, 8: 103-12. Tokyo, 1956.
- HASHIMOTO, T., NISHIMURA, M., & MANIWA, Y. "Propagation characteristics of high frequency ultrasonic in sea water". Techn. Rep. Fish. Boat, 6: 93-104. Tokyo, 1955.

- HELA, I. "The sound channel of the Baltic Sea". *Geophysica*, 5 (4): 153–61. Helsinki, 1957.
- HUBBARD, C. J. "Measurement of spectral distribution of light underwater". Status Rep. Woods Hole Inst. Oceanogr., 58–6. Woods Hole, Mass., 1958.
- IVANOFF, A. "Contribution à l'étude des propriétés optiques de l'eau de mer en Bretagne et en Corse, et à la théorie de la polarisation sous-marine". *Ann. Géophys.*, 13 (1): 22. Paris, 1957.
- IVANOFF, A. "Mission de la 'Calypso' pour l'étude optique des eaux côtières de la Corse. 2. Contribution à l'étude des propriétés optiques de l'eau de mer en Bretagne et en Corse, et à la théorie de la polarisation sous-marine". *Ann. Inst. Océanogr.*, 34: 309–36. Paris, 1958.
- KOLESNIKOV, A. G. "Formation of sea temperature during the period of autumn cooling". *Trudy Morsk. Gidrofiz. Inst.* 4: 3–14. Moscow, 1954.
- KOZLIANINOV, M. V. "A new device for the measuring of the optical properties of the sea-water". *Trudy Inst. Okeanol., Akad. Nauk SSSR*, 25: 134–42. Moscow, 1957.
- LAUGHTON, A. S. "Sound propagation in compacted ocean sediments". *Geophysics*, 22 (2): 233–60. Tulsa, Okl., 1957.
- LEIKIS, D. I., & KABANOV, B. N. "Non-polarized electrodes for the measurement of small potential differences in the sea". *Trudy Inst. Okeanol., Akad. Nauk SSSR*, 19: 112–16. Moscow, 1956.
- LENOBLE, J. "Étude de la pénétration du rayonnement ultraviolet dans les eaux côtières de Bretagne". *Ann. Géophys.*, 12 (3): 225. Paris, 1956.
- LENOBLE, J. "Mission de la 'Calypso' pour l'étude optique des eaux côtières de la Corse. 1. Pénétration du rayonnement ultraviolet dans la mer". *Ann. Inst. Océanogr.*, 34: 297–308. Paris, 1958.
- MANIWA, Y. "Study on the ultrasonic wave form reflected on the sea bottom, fishschools and seaweeds". *Techn. Rep. Fish. Boat*, 11: 157–75. Tokyo, 1958.
- MOREIRA DA SILVA, P. "Um novo método para a determinação das correntes de densidade adaptado à Tábua H. O. 614". *Anais Hidrogr.*, 15: 173–77. Rio de Janeiro, 1956.
- NOBLE, W. J. "Theory of the shadow zone diffraction of underwater sound". *J. Acoust. Soc. America*, 28 (6): 1247. Menasha, Wis., 1956.
- OLSON, F. C. W. "Nomograms for hydrometer salinity and sea-water density". *Florida State Univ. Stud.*, 22. Florida, 1956.
- PALM, E. "On Reynolds stress, turbulent diffusion and velocity profile in a stratified fluid". *Geofys. Publ.*, 20 (2). Oslo, 1958.
- SALA, I. "Einige Messungen der Eisfestigkeit". *Geophysica*, 5 (3): 150–52. Helsinki, 1957.
- SCHIEMER, E. W., & PRITCHARD, D. W. "The Chesapeake Bay Institute conductivity-temperature-indicator. (CBI-CTI)". *Techn. Rep. Chesapeake Bay Inst.*, 12 (57–1). Baltimore, 1957.
- SHISHKINA, O. V. "On the question of the study of muddy sea water". *Trudy Inst. Okeanol., Akad. Nauk SSSR*, 13: 94–99. Moscow, 1955.
- SHOULEJKIN, V. V. "Telluric currents in the ocean and magnetic declination". *Doklady Akad. Nauk SSSR*, 119 (2): 257–60. Moscow, 1958.
- DA SILVA, P. C. M. "Um nova método para a determinação das correntes de densidade". *Anais Hidrogr.*, 14: 53. Rio de Janeiro, 1953–1955.
- UUSITALO, S. "On the interpretation of bathythermograms". *Geophysica*, 5 (3): 134–38. Helsinki, 1957.

## 2) e Sea Water, Chemistry

- AKERS, L. K., RONA, E., & HOOD, D. W. "Scintillation spectrometers in the determination of trace elements in sea water". *Bull. American Phys. Soc., Ser. 2*, 1: 261. New York, 1956.
- ANON. "Radio-isotopes in the physical sciences. Use of radio-isotopes in geophysical, geological, and archeological research (including meteorology and oceanography)". UNESCO, Inform. Bull. Internat. Sci. Radio Un., 102: 47 & 49. Paris, 1957.
- B RUEVICH, C. V. "Nitrites and nitrification in the sea". *Trudy Inst. Okeanol., Akad. Nauk SSSR*, 8: 3–17. Moscow, 1954.
- CAMPS, J., SELGA, J., & ARIAS, E. "Determinación de la materia organica en el agua de mar". *Inst. Invest. Pesqu., Reunión Product. y Pesqu.*, 3: 74–75. Barcelona, 1957.
- CARRITT, D. E. "Analytical chemistry in oceanography". *J. Chem. Educat.*, 35: 119–22. Easton, Pa., 1958.
- CRAIG, H. "Isotopic tracer techniques for measurement of physical and chemical processes in the sea and the atmosphere". *Publ. Nation. Acad. Sci., Nation. Res. Council.*, 551: 103–20. Washington, 1957.

- ELLISON, F. O., & SHULL, H. "A theoretical study of the electronic structure of water". US Atomic Energy Commis., ISC-418. Washington, 1954.
- GILLBRICHT, M. "Ein Verfahren zum oxydativen Nachweis von organischer Substanz im Seewasser". *Helgoländer Wiss. Meeresunters.*, 6 (1): 76-83. List (Sylt), 1957.
- GOLDBERG, E. D. "The process of regulating the composition of sea water". *J. Chem. Educat.*, 35: 116-19. Easton, Pa., 1958.
- HAMON, B. V. "A portable temperature-chlorinity bridge for estuarine investigations and sea water analysis". *J. Sci. Instrum.*, 33 (9): 329-33. London, 1956.
- HERRERA, J. "Determinación de fosfatos en el agua del mar". *Inst. Invest. Pesqu., Reunión Product. y Pesqu.*, 3: 44-47. Barcelona, 1957.
- ISAEVA, A. B. "The determination of nitrates in sea-water by the diphenylamine method with the help of the photo-electric colorimeter". *Trudy Inst. Okeanol., Akad. Nauk SSSR*, 19: 304-11. Moscow, 1956.
- IVANOV, R. N. "Investigation of the hydrostatic method of determining salinity". *Trudy Morsk. Gidrofiz. Inst.*, 5: 3-15. Moscow, 1955.
- KALLE, K. "Ein einfaches Klein-Aräometer zur exakten Bestimmung des Salzgehaltes im Meerwasser". *Deutsche Hydrogr. Zeitschr.*, 10 (3): 99-108. Hamburg, 1957.
- KASHIWADA, K., *et al.* "Vitamin B<sub>12</sub> in sea water. II. The assay method and the distribution of vitamin B<sub>12</sub> in the ocean". *Nippon Suisangaku Kaishi*, 22: 637-40. Tokyo, 1957.
- KNOWLES, G., BRIGGS, R., & DYKE, G. V. "Continuous oxygen determination in rivers and effluents". *Chem. Age*, 78: 722. London, 1957.
- LEPESHKOV, I. N. "Physicochemical studies of sea salts". *Khim. Nauka i Prom.*, 2 (6): 687-92. Moscow, 1957.
- LUNDBORG, M. "Effectivity of practical electrolyte chlorination of sea water". *Svensk Kem. Tidskr.*, 67 (11): 523. Adolfsberg, 1955.
- LYMAN, J., & ABEL, R. B. "Chemical aspects of physical oceanography". *J. Chem. Educat.*, 35: 113-15. Easton, Pa., 1958.
- MATSUDAIRA, C., IWASAKI, H., & TSUDA, T. "Quantitative ecology of marine population in the boundary zone. I. The relation between dissolved oxygen and phosphate in sea water". *Nippon Suisangaku Kaishi*, 21: 1134-40. Tokyo, 1955-56.
- MIYAKE, Y., & SUGIURA, Y. "The method of measurement of radioactivity in sea water". *Pacific Sci. Assoc.*, 9th Pacific Sci. Congr., Abstr. Pap. Bangkok, 1957.
- MURPHY, J., & RILEY, J. P. "A single-solution method for the determination of soluble phosphate in sea water". *J. Mar. Biol. Assoc.*, 37 (1): 9-14. Cambridge, 1958.
- SHISHKINA, O. V. "Method of determination of sulphate ions in sea water". *Trudy Inst. Okeanol., Akad. Nauk SSSR*, 8: 253-68. Moscow, 1954.
- SKOPINTEV, B. A., VOROB'eva, R. V., & SHTUKOVSKAYA, L. A. "The determination of calcium and the sum of calcium and magnesium in sea water by a complexometric method". *Gidrokhim. Materialy*, 27: 146-51. Moscow, 1957.
- DE SOUSA, A. "Composition and chemical analysis of sea waters in loco". *Ciência*, 2 (14): 41-46. Lisbon, 1956.
- SPENCER, C. P. "The chemistry of ethylenediamine tetra-acetic acid in sea water". *J. Mar. Biol. Assoc.*, 37 (1): 127-44. Cambridge, 1958.
- STARIK, I. E., & KOLYADIN, L. B. "The conditions of occurrence of uranium in ocean water". *Geokhimiya*, 1957: 204-13. Leningrad, 1957.
- VALORI, P., & SAVOINI, F. "Die Flammenphotometrie in der Analyse der natürlichen Wasser. (1): Natriumbestimmung". *Ric. Sci.*, 27 (3): 813. Roma, 1957.
- VALORI, P., & SAVOINI, F. "Die Flammenphotometrie in der Analyse der natürlichen Wasser. (2): Kalziumbestimmung". *Ric. Sci.*, 27 (4): 1215. Roma, 1957.
- VALORI, P., TALENTI, P., & SAVOINI, F. "Die Flammenphotometrie in der Analyse der natürlichen Wasser. (3): Kalziumbestimmung". *Ric. Sci.*, 27 (6): 1914. Roma, 1957.
- VATOVA, A. "Il dosaggio dell'azoto nitrico nell'acqua di mare con l'elettrofotometro Elko II". *Nova Thalassia*, 2 (5). Venezia, 1956.
- VATOVA, A. "Il dosaggio dei silicati nell'acqua di mare con l'elettrofotometro Elko II". *Nova Thalassia*, 2 (6). 1956.
- VOPIO, A. "On the magnesium content in the Baltic". *Suomen Kemist., Sect. B*, 30: 84-88. Helsinki, 1957.
- YAMAGATA, N. "Separation of traces of cesium by ion-exchange chromatography. A preliminary study for the determination of cesium content of sea water". *Nippon Kagaku Zasshi*, 78: 513-17. Tokyo, 1957.

## 2) f Structure, Dynamics, and Circulation

- ANDERSEN, K. P., BURNS, R. B., CRAIG, R. E., DANNEVIG, A., DIETRICH, G., FEDOSOV, M., GOEDECKE, E., HERMANN, F., HILL, H. W., JERLOV, N., KÄNDLER, R., KRAUSS, W., LEDER, I. Z., LEDNEV, V. A., NORDSTRÖM, S. G., PASTUKHOVA, N. M., PRAHM, G., SMED, J., STEFANSSON, U., TAIT, J., THOMSEN, H., WÜST, G., & ZAITSEV, G. "Hydrography". ICES, Ann. Biol., **13**. Copenhagen, 1958.
- ANON. "Évolution de la température des eaux superficielles à Grande-Rivière, Baie-des-Chaleurs, et à Gros-cap, Iles-de-la-Madeleine". Dépt. Pêch. Québec, Rapp. Ann. Stat. Biol. Mar., 1953: 139-45. Québec, 1954.
- ANON. "Overzicht gemiddelde water-temperatuur in Nederland". Kon. Nederlands Meteorol. Inst., **37** (94b). 1956.
- ANON. "La mesure des courants marins". Bull. Liaison Nav. Sélect., **15**: 5. Paris, 1957.
- ANON. "Low-velocity current meter". US Dept. Inter., Fish & Wildl. Serv., Fish. Instrum. Lab. Newsl., **1** (1): 3. Seattle, 1957.
- ANON. "Observations with the model II Robert's current meter". J. Coast & Geodet. Surv., **7**. Washington, 1957.
- ANON. "Density of sea water at tide stations, Atlantic coast, North and South America. Fifth Edition, with data through 1956". US Dept. Commerce, Publ. Coast & Geodet. Surv., **31-2**. Washington, 1957.
- ANON. "Canadian drift bottle data Atlantic coast". Fish. Res. Board Canada, Manuscr. Rep. Ser., (Oceanogr. & Limnol.), **15**. Ottawa, 1958.
- ANON. "Floteurs-témoins de courant, neuvième liste de floteurs récupérés". Bull. Inform. (COEC), **10** (4): 224-34. Paris, 1958.
- BANSE, K. "Ergebnisse eines hydrographischproduktionsbiologischen Längsschnitts durch die Ostsee im Sommer 1956. II. Die Verteilung von Sauerstoff, Phosphat und suspendierter Substanz". Kieler Meeresf., **13** (2): 186-201. Kiel, 1957.
- BARANOV, I. V., & SPAJCHER, A. O. "Die Änderung einiger Elemente der hydrologischen Verhältnisse in der Ostsee". Izvest. Vsesoy. Geogr. Obshch., **88** (3): 239. Leningrad, 1956.
- BECKINSALE, R. P. "General characteristics and circulation of ocean waters". Land, Air & Ocean, 2nd Edit.: 131. London, 1956.
- BIRICENMATER, K. "Turbidity currents in the marine environment". Przegł. Geofiz., **2** (10): 165-78. Warsaw, 1957.
- BÖHNECKE, G. "The principles of measuring currents". Publ. Sci. Assoc. Océanogr. Phys., Union Géodés. et Géophys. Internat., **14**. Göteborg, 1955.
- BOSSOLASCO, M., & DAGNINO, I. "Sulle correnti costiere nel Golfo di Genova". Geofis. Pura e Applic., **38**: 123-40. Milano, 1957.
- BOWEN, V. T., & SUGIHARA, T. T. "Strontium 90 in North Atlantic surface water". Proc. Nation. Acad. Sci., **43** (7): 576-80. Washington, 1957.
- BROOKS, C. F., & BROOKS, E. S. "The accuracy of wind-speed estimates at sea". Trans. American Geophys. Union, **39** (1): 52-57. Washington, 1958.
- BURKOV, V. A. "About the methods of the observations for the currents at the deep-sea diurnal anchored stations". Trudy Inst. Okeanol., Akad. Nauk SSSR, **25**: 25-44. Moscow, 1957.
- BURKOV, V. A. "The experience of installing the anchored pole with the passive target at the deep-sea diurnal stations". Trudy Inst. Okeanol., Akad. Nauk SSSR, **25**: 45-54. Moscow, 1957.
- CARTER, D. B. "The water balance of the Mediterranean and Black Seas". Drexel Inst. Technol., Lab. Climatol., Publ. in Climatol., **9** (3): 125-75. 1956.
- COOPER, L. H. N. "Sea temperatures in Plymouth Sound". J. Mar. Biol. Assoc., **37** (1): 1-3. Cambridge, 1958.
- CRAIG, H. "Disposal of radioactive wastes in the ocean: the fission product spectrum in the sea as a function of time and mixing characteristics". Publ. Nation. Acad. Sci., Nation. Res. Council., **551**: 34-42. Washington, 1957.
- CURL, H. C. "The hydrography and phytoplankton ecology of the inshore, northeastern Gulf of Mexico". Dissert. Abstr., **16** (11): 2003. Ann Arbor, Mich., 1956.
- DENAMUR, J. "Étude physico-chimique des eaux du Détroit de Bonaficio". Trav. Centre Rech. et Étud. Océanogr., **2** (10). Paris, 1955.
- DIETRICH, G. "Ergebnisse synoptischer ozeanographischer Arbeiten in der Nordsee". Verh. Deutschen Geographentags, 1955:30. Hamburg, 1957.



- DMITRIEV, A. A. "Über die Darstellung geophysikalischer Zirkulationen in einem rotierenden parabolischen Gefäss". *Izvest. Akad. Nauk SSSR, Ser. Geofiz.*, 1956 (3): 320. Moscow, 1956.
- DROGAITSEV, D. A. "Structure of the wind field over the ocean". *Trudy Inst. Okeanol., Akad. Nauk SSSR*, 9: 23–53. Moscow, 1954.
- DUROCHE, J., & SERPAUD, J. "Le courantographe BBT – Neyrpic". *Trav. Centre Rech. et Étud. Océanogr., N. S.*, 3 (1): 9–15. Paris, 1958.
- EINARSSON, H. "On the origin and dispersal of Icelandic fish populations with special regard to the herring". *Natturfraedingurinn*, 24 (2): 60–91. Reykjavik, 1954.
- FEDEROV, K. N. "Das Niveau und die Strömung während des Nordseeorkans des Jahres 1953". *Izvest. Akad. Nauk SSSR, Ser. Geofiz.*, 1956 (4): 437. Moscow, 1956.
- FEDEROV, K. N. "Results of the study of wind-induced field currents in the sea by means of models". *Trudy Inst. Okeanol., Akad. Nauk SSSR*, 19: 83–97. Moscow, 1956.
- FELZENBAUM, A. I. "Eine Untersuchung des Zusammenhanges zwischen dem Wind, der Dichteverteilung, der Form der Oberfläche und der Strömung eines inhomogenen Meeres". *Izvest. Akad. Nauk SSSR, Ser. Geofiz.*, 1956 (8): 958. Moscow, 1956.
- FELZENBAUM, A. I. "An indirect method of determining the coefficient of vertical exchange in a shallow sea in relation to its depth, wind-speed and vertical co-ordinates". *Trudy Inst. Okeanol., Akad. Nauk SSSR*, 19: 46–56. Moscow, 1956.
- FELZENBAUM, A. I. "The method of field currents in classical theory of marine currents". *Trudy Inst. Okeanol., Akad. Nauk SSSR*, 19: 57–82. Moscow, 1956.
- FELZENBAUM, A. I., FOMIN, L. M., & STOKMANN, V. B. "The method of calculation of deep-sea currents by means of using the surface current and the gradient of the atmospheric pressure". *Trudy Inst. Okeanol., Akad. Nauk SSSR*, 25: 153–70. Moscow, 1957.
- FOLSOM, T. R., & VINE, A. C. "On the tagging of water masses for the study of physical processes in the oceans". *Publ. Nation. Acad. Sci., Nation. Res. Council.*, 551: 121–32. Washington, 1957.
- FOMIN, L. M. "Über die Eindringtiefe der winderzeugten Meeresströmungen". *Izvest. Akad. Nauk SSSR, Ser. Geofiz.*, 1956 (2): 172. Moscow, 1956.
- FOMIN, L. M. "About the accuracy of dynamical method of the calculation of the sea-currents". *Trudy Inst. Okeanol., Akad. Nauk SSSR*, 25: 118–33. Moscow, 1957.
- GEZENTSVEI, A. N. "Divergence of drift flow and the advection of heat by the flow in the northern part of the Pacific Ocean and North Atlantic". *Trudy Inst. Okeanol., Akad. Nauk SSSR*, 9: 54–118. Moscow, 1954.
- HANSEN, W. "Einfluss der Strömungen und Wasserstände in der Deutschen Bucht auf die Küstengestaltung". *Verh. Deutschen Geographentags*, 1955: 346. Hamburg, 1957.
- HANZAWA, M. "Studies on the inter-relationship between the sea and the atmosphere (Part 2)". *Oceanogr. Mag.*, 9 (1): 87–93. Tokyo, 1957.
- HASSAN, E. S. M. "On the ocean circulation". *New York Univ. Coll. Engin., Res. Div., Dept. Meteorol. & Oceanogr., Off. Naval Res., Contr. No. Nonr 285* (12): 54–110. Washington, 1957.
- HEEZEN, B. C., EWING, M., & MENZIES, R. J. "Submarine turbidity currents". *Priroda*, 1958 (2): 100–04. Moscow, 1958.
- HELA, I. "Longitudinal and transversal slope of the Florida current". *Geophysica*, 5 (4): 116–23. Helsinki, 1957.
- HIDAKA, K. "Upwelling in baroclinic ocean". *Pacific Sci. Assoc., 9th Pacific Sci. Congr., Abstr. Pap. Bangkok*, 1957.
- ISONO, K. "On sea-salt nuclei in the atmosphere". *Geofis. Pura e Applic.*, 26 (1): 156. Milano, 1957.
- IVANOV-FRANTSKEVICH, G. N. "On the vertical stability of water strata". *Trudy Inst. Okeanol., Akad. Nauk SSSR*, 19: 3–45. Moscow, 1956.
- KASHIWADA, K., KAKIMOTO, D., & KAWAGOE, K. "Studies on vitamin B<sub>12</sub> in sea water – III. On the diurnal fluctuation of vitamin B<sub>12</sub> in the sea and its vertical distribution in the lake". *Bull. Japanese Soc. Sci. Fish.*, 23 (7 & 8): 450–53. Tokyo, 1957.
- KETCHUM, B. H. "The effects of the ecological system on the transport of elements in the sea". *Publ. Nation. Acad. Sci., Nation. Res. Council.*, 551: 52–59. Washington, 1957.
- KONONKOV, G. E., & KONTOBOITSEV, N. V. "Variations de température dans les couches supérieures de la mer soumise à la houle". *Izvest. Akad. Nauk SSSR, Ser. Géofiz.*, 1957 (12). Moscow, 1957.
- KRAUSS, W. "Die hydrographischen Untersuchungen mit 'Anton Dohrn' auf dem ost- und westgrönlandischen Schelf im September–Oktober 1955". *Ber. Deutschen Wiss. Komm. Meerest.*, 15 (2): 77–94. Stuttgart, 1958.

- KREY, J. "Ergebnisse eines hydrographischproduktionsbiologischen Längsschnitts durch die Ostsee im Sommer 1956. III. Die Verteilung des Gesamtphosphors". *Kieler Meeresf.*, 13 (2): 202–11. Kiel, 1957.
- LACOMBE, H., & TCHERNIA, P. "Températures et salinités profondes en Méditerranée en période d'été (fin juin – fin octobre) – Étude préliminaire". *Bull. Inform. (COEC)*, 10 (4): 209–14. Paris, 1958.
- LECHNER, G. "Bergung U 2365. (Wasserströmung in den Belten)". *Mar. Rundschau*, 54 (1): 33. Berlin, 1957.
- LINEJKIN, P. S. "On the dynamics of the baroclinic layer in the ocean". *Doklady Akad. Nauk SSSR*, 117 (6): 971–74. Moscow, 1957.
- LINEJKIN, P. S. "Die Grundprobleme der dynamischen Theorie der baroklinen Schicht des Meeres". Hauptverw. Hydrometeorol. Dienst, Leningrad, 1957.
- MAMAEV, O. I. "On the problem of the zero dynamic surface and its topography in the Southern Ocean". *Doklady Akad. Nauk SSSR*, 117 (5): 808. Moscow, 1957.
- MARTIN, J. "Notice technique relative à la construction et à l'utilisation du courantomètre électrique à électrodes remorquées". *Serv. Hydrogr. Mar.*, Paris, 1956.
- MASON, B. J. "The oceans as source of cloud-forming nuclei". *Geofis. Pura e Applic.*, 26 (1): 148. Milano, 1957.
- VAN MEEL, L. "Le milieu marin au bateau-phare 'West-Hinder' période 1951–1955". *Bull. Inst. Roy. Sci. Natur. Belgique*, 33 (4). Bruxelles, 1957.
- MOROSHKIN, K. V. "The works with the electro-magnetic currentmeter in the open sea". *Trudy Inst. Okeanol., Akad. Nauk SSSR*, 25: 62–87. Moscow, 1957.
- NEUMAN, G., & OSTAPOFF, F. "Mean water transport by wind driven ocean currents in the North Atlantic for the month of February". *New York Univ. Coll. Engin., Res. Div., Dept. Meteorol. & Oceanogr., Off Naval Res., Contr. No. Nonr 285* (12): 32–53. Washington, 1957.
- NIKIFOROV, E. G. "Über den Zusammenhang zwischen der Dritfströmung und der windbedingten Wellenbewegung". *Izvest. Akad. Nauk SSSR, Ser. Geofiz.*, 1956 (12): 1450. Moscow, 1956.
- NIKOLAEV, I. I. "On the causes of fluctuations in the salinity of the Baltic Sea". *Trudy Baltiuro*, 1956 (2): 96–106. Kaliningrad, 1956.
- O'HARE, J. E. "Sea surface temperature anomalies and hurricanes". *Bull. American Meteorol. Soc.*, 38 (4): 226. Boston, 1957.
- OI, M. "Deflection of an ocean current due to a submarine ridge". *Florida State Univ. Stud.*, 22. Florida, 1956.
- OLSON, F. C. W. "An empirical expression for horizontal turbulence". *Florida State Univ. Stud.*, 7. Florida, 1952.
- PAVLOV, V. M., & KUKSA, V. I. "The experience of works with the bathythermograph TB-52 (T-52)". *Trudy Inst. Okeanol., Akad. Nauk SSSR*, 25: 88–97. Moscow, 1957.
- PETERSCHMITT, E. "Quelques données nouvelles sur les séismes profonds de la mer Tyrrhénienne". *Ann. Geofis.*, 9 (3): 305. Roma, 1956.
- PIATEK, W. "Changes in the density of the southern Baltic waters depending upon the temperature and salinity in 1949–1954". *Rep. Sea Fish. Inst. Gdynia*, 1957 (9): 381–425. Gdynia, 1957.
- PRIVETT, D. W. "The exchange of heat across the sea surface". *Mar. Observ.*, 27 (179): 23–28. London, 1958.
- RADOK, U. "The heat economy of the southern ocean. A sampling study". *Ann. Geophys.*, 12 (4): 299. Paris, 1956.
- RAFTER, T. A., & FERGUSSON, G. J. "Atom bomb effect – recent increase in the carbon-14 content of the atmosphere, biosphere, and surface water of the oceans". *New Zealand J. Sci. & Technol.*, 38: 871–83. Wellington, 1957.
- RIABIKOV, O. G. "Changes in the temperature and salinity in the regions of the southern and central basins of the Baltic Sea in 1951–1955". *Trudy Baltiuro*, 1956 (2): 107–14. Kaliningrad, 1956.
- RIABIKOV, O. G. "On the distribution of biogenic elements in the open parts of the Baltic Sea in 1955". *Trudy Baltiuro*, 1956 (2): 115–20. Kaliningrad, 1956.
- ROMANOVSKY, V. "Résultats de quelques mesures de courants profonds". *Trav. Centre Rech. et Étud. Océanogr., N.S.*, 3 (1): 3–7. Paris, 1958.
- ROMANOVSKY, V. "Les causes d'erreurs dans la mesure des courants au point fixe". *Trav. Centre Rech. et Étud. Océanogr., N.S.*, 3 (1): 17–22. Paris, 1958.
- SAGER, G. "Über die Auswirkung der ablenkenden Kraft der Erdumdrehung auf die Wasserstände im Grossen Belt". *Ann. f. Hydrogr.*, 1956 (5/6): 63–75. Stralsund, 1956.

- SAGER, G. "Die Methode der Fix- und Schleppelektroden. Ein neuer Weg in der Messung von Meeresströmungen". *Ann. f. Hydrogr.*, 1957 (9): 7-34. Stralsund, 1957.
- SAINT-GUILY, B. "Les mouvements radiaux de Hamel lorsqu'il existe une force de Coriolis et la structure de certains courants océaniques". *CR Acad. Sci.*, **244**: 1528-29. Paris, 1957.
- SAINT-GUILY, B. "Remarque sur l'importance de la force de Coriolis dans les courants marins". *Bull. Inform. (COEC)*, **10** (4): 215-18. Paris, 1958.
- SARKISIAN, A. S. "On unsteady wind currents in a baroclinic ocean". *Doklady Akad. Nauk SSSR*, **117** (6): 975-78. Moscow, 1957.
- SARKISIAN, A. S. "Sur la théorie des courants de vents non permanents dans un océan homogène". *Izvest. Akad. Nauk SSSR, Ser. Geophys.*, **10**. Moscow, 1957.
- SCHEMAINDA, R. "Die ozeanographischen Veränderungen im Bornholmtief in den Jahren 1951-1955". *Ann. f. Hydrogr.*, **8**: 48-64. Stralsund, 1957.
- SITARZ, J. "Mise au point et essais d'un courantomètre électrique à électrodes remorquées (G. E. K.) le long de la côte méditerranéenne d'Antibes à Menton en été 1956". *Trav. Centre Rech. et Étud. Océanogr., N. S.*, **3** (1): 23-50. Paris, 1958.
- SOSKIN, I. M. "Long-term fluctuation of the salinity of the Baltic". *Trudy Gosudarst. Okeanogr. Inst.*, **32** (44): 38-78. Moscow, 1956.
- STOCKMANN, V. B., & TSIKUNOV, V. A. "Development of integrated transport in the ocean by the action of wind". *Trudy Inst. Okeanol., Akad. Nauk SSSR*, **9**: 5-22. Moscow, 1954.
- STOCKMANN, V. B. "The influence of the wind on the currents in the Bering Straits, the causes of their high velocity and prevailing northward direction". *Trudy Inst. Okeanol., Akad. Nauk SSSR*, **25**: 171-97. Moscow, 1957.
- STOMMEL, H. "A survey of ocean current theory". Woods Hole, Mass., 1957.
- STONELEY, R. "On turbidity currents". *Verh. Nederlands Geol.-Mijn. Genoot.*, *Geol. Ser.*, **18**: 279-85. The Hague, 1957.
- SYSOEV, N. N. "The calculation and exclusion of the influence of the horizontal component of the earth's magnetic field in the measurement of currents by the electromagnetic method in a vessel under way". *Trudy Inst. Okeanol., Akad. Nauk SSSR*, **19**: 107-11. Moscow, 1956.
- SYSOEV, N. N. "The use of radiolocators in the study of currents at sea". *Trudy Inst. Okeanol., Akad. Nauk SSSR*, **19**: 117-28. Moscow, 1956.
- SYSOEV, N. N. "Method and apparatus for deep-water oceanographical measurements". *Trudy Inst. Okeanol., Akad. Nauk SSSR*, **19**: 156-63. Moscow, 1956.
- SYSOEV, N. N. "Methods and devices for the measurement of deep currents in the oceans". *Pacific Sci. Assoc., 9th Pacific Sci. Congr., Abstr. Pap.* Bangkok, 1957.
- SYSOEV, N. N. "The development of the technics and the methods of work for the observation of currents in the ocean at the anchored stations". *Trudy Inst. Okeanol., Akad. Nauk SSSR*, **25**: 7-24. Moscow, 1957.
- TAKENOUTI, Y. "Long-range oceanographic forecast, historical review and future problem". *Oceanogr. Mag.*, **9** (1): 1-12. Tokyo, 1957.
- TOWNSEND, A. A. "The structure of turbulent shear flow". The University Press, Cambridge, 1956.
- TRITES, R. W., & BANKS, R. E. "Circulation on the Scotian Shelf as indicated by drift bottles". *J. Fish. Res. Board Canada*, **15** (1): 79-89. Ottawa, 1958.
- TUREKIAN, K. K., & KLEINKOFF, M. D. "Estimates of the average abundance of Cu, Mn, Pb, Ti, Ni, and Cr in surface waters of Maine". *Bull. Geol. Soc. America*, **67**: 1129. New York, 1956.
- VIVES, F., & LÓPEZ-BENITO, M. "Sobre la hidrografía y planctología de la Ria de Vigo". *Inst. Invest. Pesqu., Reunión Product. y Pesqu.*, **3**: 84-86. Barcelona, 1957.
- VOIPIO, A. "On the magnesium content in the Baltic". *Suomen Kemist.*, **30**: 84-88. Helsinki, 1957.
- VOLLBRECHT, K. "Die Beziehungen zwischen Windrichtung und materialversetzender Wellenenergie". *Acta Hydrophysica*, **4** (1): 49. Berlin, 1957.
- VOLLEOV, V. G. "A method and apparatus for the electromagnetic measurement of currents". *Trudy Inst. Okeanol., Akad. Nauk SSSR*, **19**: 98-106. Moscow, 1956.
- WALDEN, H. "Beziehungen zwischen Wind und Windsee im festliegenden und im wandernden Windfeld". *Hansa*, **94** (11): 521. Hamburg, 1957.
- WATTS, J. C. D. "Thermocline off the coast of tropical West Africa". *Nature*, **181** (4612): 863-64. London, 1958.
- WOOSTER, W. S., & KETCHUM, B. H. "Transport and dispersal of radioactive elements in the sea". *Publ. Nation. Acad. Sci., Nation. Res. Council.*, **551**: 43-51. Washington, 1957.

- WÜST, G. "Ergebnisse eines hydrographischproduktionsbiologischen Längsschnitts durch die Ostsee im Sommer 1956. I. Die Verteilung von Temperatur, Salzgehalt und Dichte". *Kieler Meeresf.*, **13** (2): 163–85. Kiel, 1957.
- YOSHIDA, K. "A study on upwelling". *Pacific Sci. Assoc.*, 9th Pacific Sci. Congr., Abstr. Pap. Bangkok, 1957.

## 2) g Waves, Tides, and Sea-Level

- ABBOTT, M. R. "A theory of the propagation of bores in channels and rivers". *Proc. Cambridge Philos. Soc.*, **52** (2): 344. London, 1956.
- ANON. "Bibliography on tides 1665–1939". *Publ. Sci., Assoc. Océanogr. Phys., Union Géodés. et Géophys. Internat.*, **15**. Bergen, 1955.
- ANON. "Tides, harmonic constants". *Spec. Publ. Internat. Hydrogr. Bur. Monaco*, **26**. Monaco, 1956.
- ANON. "Rate of postglacial rise of sea level". *J. Coast & Geodet. Surv.*, **7**. Washington, 1957.
- ANON. "Monthly and annual mean heights of sea-level 1952 to 1956 and unpublished data for earlier years". *Publ. Sci. Assoc. Océanogr. Phys., Union Géodés. et Géophys. Internat.*, **19**. Göteborg, 1958.
- ARAKAWA, H. "On typhoon storm tides". *Geofis. Pura e Applic.*, **38**: 231–49. Milano, 1957.
- BONNEFILLE, R. "Deuxième étude de l'influence de la variation de la période de la marée sur le modèle de la Manche". *E. D. F. Lab. Nation. Hydraul., Chatou, France*, 1956.
- BONNEFILLE, R. "Avant projet de modèle hydraulique fixe représentant les marées océaniques semi-diurnes". *E.D.F. Lab. Nation. Hydraul., Chatou, France*, 1957.
- BOSSOLASCO, M., CAVO, A., & DAGNINO, I. "Sulla genesi dei microsismi". *Geofis. Pura e Applic.*, **38**: 45–56. Milano, 1957.
- BRETSCHNEIDER, C. L. "Wave forecasting relationships for the Gulf of Mexico". *Techn. Mem. Beach Erosion Board*, **84**. Washington, 1956.
- BRETSCHNEIDER, C. L., & GAUL, R. D. "Wave statistics for the Gulf of Mexico off Tampa Bay, Florida". *Techn. Mem. Beach Erosion Board*, **89**. Washington, 1956.
- BROOKS, R. L., & JASPER, N. H. "Statistics on wave heights and periods for the North Atlantic Ocean". *David Taylor Model Basin Rep.*, **1091**. 1957.
- VAN DANTZIG, D., & HEMELRIJK, J. "Over de mogelijkheid van statistische voorspelling van extreem hoge waterstanden en haar grenzen". *Rapp. Math. Centrum*, 1955: 114. Amsterdam, 1955.
- DARBYSHIRE, J. "A preliminary investigation of long waves at Newlyn". *Quart. J. Roy. Meteorol. Soc.*, **84** (359): 66–69. London, 1958.
- DRAPER, L. "L'atténuation de la houle en fonction de la profondeur". *Houille Blanche*, 1957 (6): 1–6. Grenoble, 1957.
- DYVANIN, A. U. "The level of the sea". *Hydrometeorol. Inst., Leningrad*, 1956.
- EGOROV, E. N. "Several peculiarities of waves and wave flow in the region of underwater ridges". *Trudy Inst. Okeanol., Akad. Nauk SSSR*, **8**: 229–41. Moscow, 1954.
- FRANCO, A. S. "Marés em pequenas profundidades". *Anais Hidrogr.*, **14**: 67. Rio de Janeiro, 1953/55.
- GELCI, R., & CAZALE, H. "L'agitation microsismique au Maroc – Corrélation avec la houle et le vent". *Bull. Inform. (COEC)*, **10** (2): 52–63. Paris, 1958.
- GILLE, P. "La houle et les vagues en haute mer et sur les côtes". *Bull. Inform. (COEC)*, **10** (2): 74–92. Paris, 1958.
- GILLE, P. "Phénomènes de houle à Douarnenez". *Bull. Inform. (COEC)*, **10** (3): 153–57. Paris, 1958.
- GOODY, A. J., & DAVIES, T. V. "The theory of symmetrical gravity waves of finite amplitude (4): Steady, symmetrical, periodic waves in a channel of finite depth". *Quart. J. Mechan. & Appl. Math.*, **10** (1): 1. Oxford, 1957.
- IVANOV, A. A. "On the question of predicting the elements of wind waves". *Trudy Morsk. Gidrofiz. Inst.*, **5**: 59–65. Moscow, 1955.
- IVANOV, A. A. "Characteristics of wind waves generated in shallows". *Trudy Morsk. Gidrofiz. Inst.*, **5**: 66–70. Moscow, 1955.
- IYER, H. M., & DARBYSHIRE, J. "The study of microseisms for storm forecasting". *New Scientist*, **3** (69): 16–18. London, 1958.
- JAMPOLSKIJ, A. D. "Die Abhängigkeit der Elementarwelle von Windgeschwindigkeit, Windweg und Andauer seiner Entwicklung". *Izvest. Akad. Nauk SSSR, Ser. Geofiz.*, 1955 (2): 156. Moscow, 1955.

- JAMPOLSKIJ, A. D. "On the method of application of aerial photography in the study of sea waves". *Trudy Inst. Okeanol., Akad. Nauk SSSR*, **13**: 100–02. Moscow, 1955.
- JAMPOLSKIJ, A. D. "Some problems of methods of aerial photography for the study of marine waves". *Trudy Inst. Okeanol., Akad. Nauk SSSR*, **19**: 129–43. Moscow, 1956.
- JOBERT, G. "Influence de la structure de la croûte sur les déformations causées par les marées océaniques (1)". *Ann. Géophys.*, **12** (4): 290. Paris, 1956.
- JOBERT, G. "Influence de la structure de la croûte sur les déformations causées par les marées océaniques (2)". *Ann. Géophys.*, **13** (1): 83. Paris, 1957.
- JONSSON, J. "Scientific results of the expeditions to south-eastern Iceland in 1951–52 from the geographical department of Uppsala University. 3. Notes on changes of sea-level on Iceland". *Geogr. Ann.*, **39** (2–3): 143–212. Stockholm, 1957.
- KRYLOV, Y. M. "Theory and calculation of deep-sea wind waves". *Trudy Okeanogr. Inst.*, **26**: 3–86. Moscow, 1954.
- LAUWERIER, H. A. "The motion of a shallow sea under influence of a nonstationary wind-field". *Rapp. Math. Centrum*, TW31. Amsterdam, 1955.
- LAUWERIER, H. A. "The motion of a half-plane sea under influence of a nonstationary wind". *Rapp. Math. Centrum*, TW32. Amsterdam, 1955.
- LAUWERIER, H. A. "The influence of a disturbance upon an infinitely large shallow sea of constant depth". *Rapp. Math. Centrum*, TW35. Amsterdam, 1956.
- LAUWERIER, H. A. "The wind-effect in the southern part of the North Sea due to a single storm and the influence of the Channel". *Rapp. Math. Centrum*, TW36. Amsterdam, 1956.
- LISITZIN, E. "The annual variation of the slope of the water surface in the Gulf of Bothnia". *Comment. Phys.-Math.*, **20** (6). Helsingfors, 1957.
- LISITZIN, E. "Determination of the slope of the water surface in the Gulf of Finland". *Geophysica*, **5** (4): 193–202. Helsinki, 1957.
- LISITZIN, E. "Determination of the slope of the water surface in the Gulf of Finland". *Geophysica*, **5** (4). Helsinki, 1958.
- LONGUET-HIGGINS, M. S. "On the transformation of a continuous spectrum by refraction". *Proc. Cambridge Phil. Soc.*, **53** (1): 226–29. London, 1957.
- LONGUINOV, V. V. "A tentative estimate of the sand-drifting effect of waves based upon observations of wave transformation in the coastal zone". *Trudy Inst. Okeanol., Akad. Nauk SSSR*, **28**: 157–84. Moscow, 1958.
- LUNDBAK, A. "Flod og ebbe ved Grønland og i Polhavet". *Grønland*, **11**: 423. Charlottenlund, 1955.
- MAXIMOV, I. V. "On secular tidal phenomena in the earth's sea and atmosphere". *Trudy Inst. Okeanol., Akad. Nauk SSSR*, **8**: 18–40. Moscow, 1954.
- MAXIMOV, I. V. "On 'Polar tides' in the earth's sea and atmosphere". *Trudy Inst. Okeanol., Akad. Nauk SSSR*, **8**: 92–118. Moscow, 1954.
- MAXIMOV, I. V. "The polar tide' in the World Ocean". *Doklady Akad. Nauk SSSR*, **108** (5): 799–801. Moscow, 1956.
- MAXIMOV, I. V. "Long period luno-solar tide in World Ocean". *Doklady Akad. Nauk SSSR*, **118** (5): 888–90. Moscow, 1958.
- MILLER, A. R. "The effects of winds on water levels on the New England coast". *Limnol. & Oceanogr.*, **3** (1): 1–14. Baltimore, 1958.
- NEUMANN, G., & PIERSON, W. J. "A detailed comparison of theoretical wave spectra and wave forecasting methods". *Deutsche Hydrogr. Zeitschr.*, **10** (3): 73–92. Hamburg, 1957.
- PFEIFER, G. "Der statistische Wert der höchsten Wasserstände im Tidegebiet. (Vergleich des MHTw mit dem DHThw am Pegel Husum)". *Deutschen Gewässerkundl. Mitt.*, **1** (2): 25. 1957.
- POLLI, S. "Le maree nei porti di Palermo, Milazzo, Lipari e Cagliari". *Pubbl. Ist. Speriment. Talassogr. Trieste*, **336**. Trieste, 1956.
- POLLI, S. "Tabelle di previsione delle maree per Trieste e l'Adriatico settentrionale per l'anno 1957". *Pubbl. Ist. Speriment. Talassogr. Trieste*, **337**. Trieste, 1956.
- POLLI, S. "Le maree nei porti di Napoli e Civitavecchia". *Ann. Geofis.*, **9** (3): 393. Roma, 1956.
- POPOV, B. A. "Some remarks to the measurement of wave-pressure by means of tensiometrical gauges with an exterior receiving element". *Trudy Inst. Okeanol., Akad. Nauk SSSR*, **28**: 185–94. Moscow, 1958.
- POPOV, B. A. "A calculation of velocities and accelerations of wave currents as measured by pressure gauges". *Trudy Inst. Okeanol., Akad. Nauk SSSR*, **28**: 195–207. Moscow, 1958.

- ROSEAU, M. "Sur le calcul des ondes courbes parallèles au bord dans un liquide pesant sur un fond incliné". *CR Acad. Sci.*, **245** (26). Paris, 1957.
- RUSSELL, R. J. "Instability of sea level". *American Sci.*, **45** (5): 414-30. New Haven, Conn., 1957.
- SAGER, G. "Die Nutzung der Gezeitenenergie". *Zeitschr. Angew. Geol.*, **4** (2/3): 98-105. 1958.
- SEKERZ-ZENKOVIC, T. JA. "Über den Umlauf der Gezeitenwellen in Meeresengen". *Izvest. Akad. Nauk SSSR, Ser. Geofiz.*, 1957 (4): 493. Moscow, 1957.
- SHULEJKIN, V. V. "Refinement of the law of the increase in length of wind waves". *Doklady Akad. Nauk SSSR*, **111** (2): 348-51. Moscow, 1956.
- SHULEJKIN, V. V. "Ocean wave theory". *Trudy Morsk. Gidrofiz. Inst.*, **9**. Moscow, 1956.
- SHULEJKIN, V. V. "The development of sea waves from their initiation to the phase of maximum steepness". *Doklady Akad. Nauk SSSR*, **118** (3): 472-75. Moscow, 1958.
- SNODGRASS, F. E. "Shore-based recorder of low-frequency ocean waves". *Trans. American Geophys. Union*, **39** (1): 109-13. Washington, 1958.
- SNODGRASS, F. E., MUNK, W., & TUCKER, M. J. "Offshore recording of low-frequency ocean waves". *Trans. American Geophys. Union*, **39** (1): 114-20. Washington, 1958.
- SZYMBORSKI, S. "Current wave problems". *Przeglad Geofiz.*, **2** (10): 155-64. Warsaw, 1957.
- TUCKER, M. J. "The analysis of finite-length records of fluctuating signals". *British J. Appl. Phys.*, **8**: 137-42. London, 1957.
- UNOKI, S. "On the speed, travel time, and direction of ocean waves due to tropical cyclones". *J. Meteorol. Soc. Japan*, **34**: 354-63. Tokyo, 1956.
- UNOKI, S. "Recent studies of sea waves". *Weather Serv. Bull.*, **23**: 354-58. Tokyo, 1956.
- VANTROYS, L. "Notre ignorance des marées océaniques est-elle sans remède?". *Bull. Inform. (COEC)*, **10** (2): 64-73. Paris, 1958.
- VELTKAMP, G. W. "De invloed van stationaire windvelden op een zee van op delen constante diepte". *Rapp. Math. Centrum*, TW24. Amsterdam, 1954.
- VERSHINSKI, N. V. "Contemporary electrical instruments for investigating waves". *Trudy Inst. Okeanol., Akad. Nauk SSSR*, **10**: 192-202. Moscow, 1954.
- WALDEN, H., & FARMER, H. G. "Auswertung von Seegangsregistrierungen des Forschungsschiffes 'Atlantis' mit dem 'ship-borne wave recorder' sowie Vergleich mit entsprechenden Seegangsberechnungen aus den Windverhältnissen (hindcasting)". *Deutsche Hydrogr. Zeitschr.*, **10** (4): 121-34. Hamburg, 1957.
- WALDEN, H., & PIEST, J. "Beitrag zur Frage des Wellenspektrums in der Windsee". *Deutsche Hydrogr. Zeitschr.*, **10** (3): 93-99. Hamburg, 1957.
- WILSON, E. M. "A family of integrals occurring in the theory of water waves". *Quart. J. Mechan. & Appl. Math.*, **10** (2): 244. Oxford, 1957.
- YENTSCH, C. S. "A shallow-water tide range indicator". *Florida State Univ. Stud.*, **22**. Florida, 1956.

## 2) h Ice

- ANON. "Atlas der Eisverhältnisse der Deutschen Bucht und westlichen Ostsee". *Deutsche Hydrogr. Inst.*, Hamburg, 1956.
- ANON. "The state of the ice in the Arctic seas 1955". *Publ. Danske Meteorol. Inst., Charlottenlund*, 1958.
- ARMSTRONG, T. "The ice of the central polar basin". *J. Glaciol.*, **3**: 105-10. London, 1957.
- BUJNICKIJ, V. CH. "Die wichtigsten Besonderheiten der Eisverhältnisse in den antarktischen Gewässern". *Vestnik (Leningrad Univ.), Ser. Geol. i Geogr.*, **11** (1): 80. Leningrad, 1956.
- CRARY, A. P. "Arctic ice island research". *Advances in Geophys.*, **3**: 1. New York, 1956.
- GOEDECKE, E. "Über die Bedeutung der Ost-Wetterlagen Mitteleuropas für die Vereisung der deutschen Nord- und Ostseeküsten". *Ann. Meteorol.*, **7** (10/12): 386. Hamburg, 1955/56.
- GORHAM, E. "The salt content of some ice samples from Nordaustlandet (North East Land), Svalbard". *J. Glaciol.*, **3**: 181-86. London, 1958.
- LISITZIN, E. "On the reducing influence of sea ice on the piling-up of water due to wind stress". *Comment. Phys.-Math.*, **20** (7). Helsingfors, 1957.
- MAXIMOV, I. V. "Secular fluctuations in the ice-cover of the northern part of the Atlantic Ocean". *Trudy Inst. Okeanol., Akad. Nauk SSSR*, **8**: 41-91. Moscow, 1954.
- MERTINS, O. "Die Eisverhältnisse in der Dänemarkstrasse im April 1957". *Wetterlotse*, **117**: 105. Hamburg, 1957.

- OLKONEN, E., & PALOSUO, E. "A resistance gauge for measurement of ice-pressure". *Geophysica*, 5 (4): 221–25. Helsinki, 1957.
- OURA, H., & KINOSITA, S. "On the measurements of the bending and the compressive strengths of the frozen soil, the sea ice and the pond ice". *Low Temp. Sci., Ser. A*, 15: 137. Sapporo, 1956.
- VON PETERSSON, H. "Die Eisverhältnisse der südlichen und mittleren Ostsee im Winter 1951/52". *Ann. f. Hydrogr.*, 1956 (4): 71. Stralsund, 1956.
- VON PETERSSON, H. "Die Eisverhältnisse an der Küste der Deutschen Demokratischen Republik im Winter 1952/53". *Ann. f. Hydrogr.*, 1956 (5/6): 55–62. Stralsund, 1956.
- PREOBRAZHENSKI, J. V. "Album of ice formations in the sea". *Hydrometeorol. Inst., Leninograd*, 1956.
- RODEWALD, M. "Die Packeisgrenze zwischen Labrador und Grönland Mitte März 1957". *Wetterlotse*, 114/115: 87. Hamburg, 1957.
- SVERDRUP, H. U. "The stress of the wind on the ice of the Polar Sea". *Norsk Polarinst. Skr.*, 111. Oslo, 1956 & 1957.
- TABATA, T. "Studies on the visco-elastic properties of sea ice". *Low Temp. Sci., Ser. A*, 15: 101. Sapporo, 1956.
- UUSITALO, S. "Beobachtungen mit Bezug auf das Meereseis". *Geophysica*, 5 (3): 139–46. Helsinki, 1957.
- YAMAJI, K., & KUROIWA, D. "Visco-elastic property of ice in the temperature range 0°~–100°C. I." *Low Temp. Sci., Ser. A*, 15: 171. Sapporo, 1956.

## 2) i Coastal Oceanography and Limnology

- ARLMAN, J., SANTEMA, P., & SVASEK, J. N. "Movement of bottom sediment in coastal waters by current and waves; measurements with the aid of radioactive tracers in the Netherlands". *Rijkswaterstaat, The Hague*, 1957.
- BERTHOIS, L. "Observation d'une tranche d'eau suivie dans ses déplacements entre Basse-Indre et Saint-Nazaire". *Bull. Inform. (COEC)*, 10 (4): 192–208. Paris, 1958.
- BOLDYREV, V. L. "Degradation processes of coastal embankments as illustrated by the Kerchensky Strait coasts". *Trudy Inst. Okeanol., Akad. Nauk SSSR*, 28: 85–92. Moscow, 1958.
- CAPSTICK, C. K. "The salinity characteristics of the middle and upper reaches of the River Blyth estuary". *J. Anim. Ecol.*, 26 (2): 295–315. Oxford, 1957.
- DRONKERS, J. J. "Colloquium over hoge waterstanden (2): Over de hoogste waterstanden langs de Nederlandse kust". *Math. Centrum, Statist. Afd., Amsterdam*, 1953.
- FRAGA, F. "Nitrógeno orgánico suspendido y disuelto en la Ria de Vigo". *Reunión Product. y Pesqu.*, 3: 26–28. Castellón, 1957.
- GAMESON, A. L. H., HALL, H., & PREDDY, W. S. "Effects of heated discharges on the temperature of the Thames estuary". *Engineer*, 204: 816, 850, & 893. London, 1957.
- INGLIS, C. C., & ALLEN, F. H. "The regimen of the Thames estuary as affected by currents, salinities and river flow". *Proc. Inst. Civil Engin.*, 7 (Aug.). London, 1957.
- LEONTOV, O. K. "Bottom accumulated forms of the coastal zone". *Trudy Inst. Okeanol., Akad. Nauk SSSR*, 10: 142–50. Moscow, 1954.
- LONGINOV, V. V. "On the distribution of near-bottom velocities of the water in the coastal zone". *Trudy Inst. Okeanol., Akad. Nauk SSSR*, 10: 135–41. Moscow, 1954.
- LONGINOV, V. V. "Several laws of the development of conglomerate beaches". *Trudy Inst. Okeanol., Akad. Nauk SSSR*, 10: 151–56. Moscow, 1954.
- LONGINOV, V. V. "Some observations of horizontal wave-pressure in the near-bottom water layer of the coastal zone under natural conditions". *Trudy Inst. Okeanol., Akad. Nauk SSSR*, 28: 100–56. Moscow, 1958.
- LONGINOV, V. V. "Motion of water and alluvia in the littoral zone". *Priroda*, 1958 (2): 90–92. Moscow, 1958.
- MEDVEDEV, V. S., & AYBULATOV, N. A. "A study of sandshore dynamics using the luminifers and a cableway". *Trudy Inst. Okeanol., Akad. Nauk SSSR*, 28: 37–55. Moscow, 1958.
- MIEHLKE, O. "Über die Wasserstandsentwicklung an der Küste der Deutschen Demokratischen Republik im Zusammenhang mit der Sturmflut am 3. und 4. Januar 1954". *Ann. f. Hydrogr.*, 1956 (5/6): 22–42. Stralsund, 1956.
- SAIZ, F., LÓPEZ-BENITO, M., & ANADÓN, E. "Estudio hidrografico de le Ria de Vigo – II Parte". *Reunión Product. y Pesqu.*, 3: 118–21. Castellón, 1957.
- SCRUTON, P. C. "Oceanography of Mississippi delta sedimentary environments". *Bull. American Assoc. Petrol. Geol.*, 40 (12): 2864–2952. Tulsa, Okl., 1956.

- SHEPARD, F. P. "Marginal sediments of Mississippi delta". Bull. American Assoc. Petrol. Geol., **40** (11): 2537-2623. Tulsa, Okl., 1956.
- SOUTHGATE, B. A. "The capacity of estuaries to purify sewage and industrial wastes". Chem. & Industr., 1957: 1638. London, 1957.
- STEWART, H. B. "Upstream bottom currents in New York Harbor". Science, **127** (3306): 1113-15. Lancaster, Pa., 1958.
- ZENKOVICH, V. P. "Dynamical classification of ocean shores". Trudy Inst. Okeanol., Akad. Nauk SSSR, **10**: 112-34. Moscow, 1954.

### 3) Plankton

#### 3) a General

- BARTHELMES, D. "Zur Abgrenzung des Planktons von den Nachbarbiocoenosen". Zeitschr. Fisch. Hilfswiss., **6** (1-7): 441-52. Berlin, 1957.
- BARY, B. M., *et al.* "A closing, high-speed plankton catcher for use in vertical and horizontal towing". Pacific Sci., **12** (1): 46-59. Honolulu, 1958.
- BOGOROV, B. G. "The production of plankton as a characteristic of different biogeographic provinces of the ocean". Doklady Akad. Nauk SSSR, **118** (6): 917-19. Moscow, 1958.
- BUTLER, P. A., & WILSON, A. J. "A continuous water sampler for estimation of daily changes in plankton". Proc. Nation. Shellf. Assoc., **47**: 109-13. Washington, 1956.
- CORLETT, J., FRASER, J. H., FURNESTIN, J., KREY, J., LINDSTRÖM, A., NIKOLAEV, I., PAVSHTIKS, E. A., & SAVILLE, A. "Plankton". ICES, Ann. Biol., **13**. Copenhagen, 1958.
- DURÁN, M. "Redes de plancton". Inst. Invest. Pesqu., 3rd Reunión Product. y Pesqu.: 108-11. Barcelona, 1957.
- KULIKOVA, E. B. "The efficiency of the ichthyoplankton net as used on the research vessel 'Vityaz'". Trudy Inst. Okeanol., Akad. Nauk SSSR, **19**: 330-33. Moscow, 1956.
- KUTKUHN, J. H. "Notes on the precision of numerical and volumetric plankton estimates from small-sample concentrates". Limnol. & Oceanogr., **3** (1): 69-83. Baltimore, 1957.
- KYLIKOVA, E. B. "Comparative catching ability of several types of plankton nets". Trudy Inst. Okeanol., Akad. Nauk SSSR, **11**: 233-37. Moscow, 1954.
- LUBNY-GERTSYK, E. A. "Plankton as a current indicator". Trudy Inst. Okeanol., Akad. Nauk SSSR, **13**: 67-70. Moscow, 1955.
- MARUMO, R. "Plankton as the indicator of watermasses and ocean currents". Oceanogr. Mag., **9** (1): 55-63. Tokyo, 1957.
- PROVASOLI, L., McLAUGHLIN, J. J. A., & DROOP, M. R. "The development of artificial media for marine algae". Arch. Mikrobiol., **25**: 392-428. Berlin, 1957.
- RAE, K. M. "The plankton around the British Isles". J. Gen. Microbiol., **16**: 265-67. London, 1957.
- SYSOEV, N. N. "Some hydrodynamic tests with plankton nets". Trudy Inst. Okeanol., Akad. Nauk SSSR, **19**: 324-29. Moscow, 1956.
- VIVES, F., P LÓPEZ-BENITO, M. "Sobre la hidrografía y planctología de la Ría de Vigo". Inst. Invest. Pesqu., Reunión Product. y Pesqu., **3**: 84-86. Barcelona, 1957.

#### 3) b Zooplankton

- BATTAGLIA, B. "Ecological differentiation and incipient intraspecific isolation in marine copepods". Année Biol., **33**: 259-68. Paris, 1957.
- DAVID, P. M. "The distribution of the Chaetognatha of the Southern Ocean". Discovery Rep., **29**: 199-228. Cambridge, 1958.
- DOW, T. G., & MENZIES, R. J. "The pelagic isopod *Idotea metallica* in the Mediterranean". Pubbl. Staz. Zool. Napoli, **30**: 330-36. Napoli, 1957.
- EPSTEIN, L. M. "Zooplankton of Onezhsk Bay and its significance in the feeding of herring and young fishes". Materials for a Complex Study of the White Sea, **1**: 315-49. Moscow, 1957.
- EPSTEIN, L. M. "Zooplankton of the White Sea isthmus at the western coast of Kanin peninsula". Materials for a Complex Study of the White Sea, **1**: 350-54. Moscow, 1957.
- FURNESTIN, M.-L. "Chaetognaths and zooplankton of the Atlantic coast of Morocco". Année Biol., **33**: 345-66. Paris, 1957.
- GRICE, G. D. "A qualitative and quantitative seasonal study of the Copepoda of Alligator Harbor". Florida State Univ. Stud., **22**. Florida, 1956.



- HALLGRIMSSON, I. "Zooplankton in Icelandic waters". *Naturufraedingurinn*, **27**: 173–85. Reykjavik, 1957.
- HALLGRIMSSON, I. "A short-cut method for estimating zooplankton composition while at sea". *Rit. Fiskid.*, **2** (6). Reykjavik, 1958.
- HARDER, W. "The reactions of organisms (plankton) to discontinuity layers". *Année Biol.*, **33**: 227–32. Paris, 1957.
- HARRIS, E. "Radiophosphorus metabolism in zooplankton and microorganisms". *Canadian J. Zool.*, **35**: 769–82. Ottawa, 1957.
- HEINRICH, A. K. "The vertical distribution of copepods in the Kuroshio current and the way they penetrate into the zone of mixing of subtropical and subarctic waters". *Doklady Akad. Nauk SSSR*, **118** (6): 1191–93. Moscow, 1958.
- KAMSHILOV, M. M. "Some new data on the White Sea zooplankton". *Materials for a Complex Study of the White Sea*, **1**: 305–14. Moscow, 1957.
- KAROTKEVICH, V. S. "On the occurrence of pelagic nemertines in the polar basin". *Trudy Zool. Inst.*, **21**: 161. Moscow, 1955.
- LOMAKINA, N. B. "*Pavlovskeola campylaspoides* – representative of a new genus of Cumacea (Cumacea, Nannastacidae)". *Trudy Zool. Inst.*, **21**: 190. Moscow, 1955.
- MARR, J. W. S. "Further comments on the occurrence of *Euphausia superba* in a humpback whale caught off Southern Queensland". *Norsk Hvalf.-Tid.*, **46** (4): 181–82. Sandefjord, 1957.
- MARSHALL, S. M., & ORR, A. P. "The life history of the copepod *Calanus finmarchicus* in different latitudes". *Année Biol.*, **33**: 43–47. Paris, 1957.
- MARSHALL, S. M., & ORR, A. P. "Seasonal changes in respiration in copepods". *Année Biol.*, **33**: 221–26. Paris, 1957.
- MOORE, H. B., & O'BERRY, L. "Plankton of the Florida current. IV. Factors influencing the vertical distribution of some common copepods". *Bull. Mar. Sci. Gulf & Caribbean*, **7** (4): 297–315. Coral Gables, Fla., 1957.
- NAUMOV, D. V. "The systematic position of the poisonous medusae – 'crosslets' and a revision of the genus *Gonionemus* A. Agassiz". *Trudy Zool. Inst.*, **21**: 102. Moscow, 1955.
- NEPGEN, C. S. de V. "The South African pilchard (*Sardinops ocellata*) and maasbanker (*Trachurus trachurus*). The euphausiids of the west coast of South Africa". *Invest. Rep. Div. Fish., Dept. Commerc. & Industr., Union South Africa*, **28**. Cape Town, 1957.
- PLESSIS, Y. "Sur la présence sporadique de physalies dans la Manche". *Bull. Mus. Nation. Hist. Natur.*, **29** (6): 496–99. Paris, 1957.
- PONOMAREVA, L. A. "Methods for studying euphausiids". *Trudy Inst. Okeanol., Akad. Nauk SSSR*, **19**: 334–39. Moscow, 1956.
- RUSSELL, F. S. "Notes on the medusa *Amphinema krampi* Russell". *J. Mar. Biol. Assoc.*, **37** (1): 81–84. Cambridge, 1958.
- SWIEZAWSKA-WIKTOROWA, K. "Zooplankton in the Firth of Szczecin". *Rep. Sea Fish. Inst. Gdynia*, **9**: 501–47. Gdynia, 1957.
- VINOGRADOV, M. E. "The vertical migration of zooplankton and its role as a food for bathypelagic fauna". *Trudy Inst. Okeanol., Akad. Nauk SSSR*, **13**: 71–77. Moscow, 1955.
- WIBORG, K. F. "Quantitative variations of the zooplankton in Norwegian coastal and offshore waters during the years 1949–56". *Fiskeridirekt. Skr., Ser. Havunders.*, **12** (1). Bergen, 1958.
- WILSON, D. P. "On some small *Ianthina ianthina* (L.) stranded on the Isles of Scilly, 1957". *J. Mar. Biol. Assoc.*, **37** (1): 5–8. Cambridge, 1958.
- YASHNOV, V. A. "Morphology, distribution, and systematics of *Calanus finmarchicus* S. L." *Zool. Zhurn.*, **34** (6): 1210–23. Moscow, 1956.
- ZELIKMAN, E. A. "On the ripening of gonads and female fertility in the mass species of Barents Sea Euphausiidae". *Doklady Akad. Nauk SSSR*, **118** (1): 201–04. Moscow, 1958.

### 3) c Phytoplankton

- BEIN, S. J. "The relationship of total phosphorus concentration in sea water to red tide blooms". *Bull. Mar. Sci. Gulf & Caribbean*, **7** (4): 316–29. Coral Gables, Fla., 1957.
- BEKLEMISHEV, K. V. "The influence of the grazing of copepods on the stocks of diatoms in far-eastern seas". *Trudy Inst. Okeanol., Akad. Nauk SSSR*, **13**: 77–82. Moscow, 1955.

- BRAARUD, T. "Counting methods for determination of the standing crop of phytoplankton". ICES, R. et P.-V., **144**: 17-19. Copenhagen, 1958.
- CHICKHACHEVA, G. M. "On the biology of the diatom (*Rhabdonema adriaticum* Ktz.)". Trudy Inst. Okeanol., Akad. Nauk SSSR, **13**: 83-88. Moscow, 1955.
- COLLIER, A. "Some biochemical aspects of red tides and related oceanographic problems". Limnol. & Oceanogr., **3** (1): 33-39. Baltimore, 1958.
- CURL, H. C. "The hydrography and phytoplankton ecology of the inshore, northeastern Gulf of Mexico". Dissert. Abstr., **16** (11): 2003. Ann Arbor, Mich., 1956.
- CUSHING, D. H. "The estimation of carbon in phytoplankton". ICES, R. et P.-V., **144**: 32-33. Copenhagen, 1958.
- CUSHING, D. H., & NICHOLSON, H. F. "The measurement of the carbon content of diatoms, using the  $^{14}\text{C}$  technique: a preliminary note". ICES, R. et P.-V., **144**: 34. Copenhagen, 1958.
- DROOP, M. R. "Auxotrophy and organic compounds in the nutrition of marine phytoplankton". J. Gen. Microbiol., **16**: 286-93. London, 1957.
- FOLLMAN, G. "The uptake and binding of water and nonelectrolytes by the cells of diatoms". Planta, **50**: 671-700. Berlin, 1958.
- GRØNTVED, J., & NIELSEN, E. S. "Investigations on the phytoplankton in sheltered Danish marine localities". Medd. Komm. Danmarks Fisk.- og Havunders., Ser. Plankton, **5** (6). København, 1957.
- HANAOKA, T. "Suspended matter as an index of the productivity of the sea". ICES, R. et P.-V., **144**: 28-31. Copenhagen, 1958.
- HELMCKE, J.-G., & KRIEGER, W. "Diatomeenschalen im elektronenmikroskopischen Bild". Bild u. Forschung, Abt. Biol., Teil 2. Verlag Bild u. Forschung, Berlin-Wilmersdorf, 1954.
- KISELEV, I. A. "Interesting cases of the formation of little chains within the limits of the genus *Peridinium* (Dinoflagellate)". Trudy Zool. Inst., **21**: 74. Moscow, 1955.
- KISELEV, I. A. "Features of distribution of the phytoplankton in the White Sea". Materials for a Complex Study of the White Sea, **1**: 282-304. Moscow, 1957.
- KREY, J. "Chemical methods of estimating standing crop of phytoplankton". ICES, R. et P.-V., **144**: 20-27. Copenhagen, 1958.
- MARSHALL, S. M., & ORR, A. P. "Some factors affecting the sinking rate of diatoms". J. Gen. Microbiol., **16**: 273. London, 1957.
- NORDLI, E. "Experimental studies on the ecology of ceratia". Oikos, **8** (2): 200-65. Copenhagen, 1957.
- SMIRNOVA, L. I. "The mode of propagation in the diatom alga *Rhizosolenia alata* Bright.". Doklady Akad. Nauk SSSR, **118** (1): 192-93. Moscow, 1958.
- SOROKIN, Y. I., & KOZLYANINOV, M. V. "Determination of dependence of photosynthesis of phytoplankton on illumination in water depths in Japanese Sea and Pacific Ocean". Doklady Akad. Nauk SSSR, **116**: 863-65. Moscow, 1957.
- SPENCER, C. P. "Utilization of trace elements by marine unicellular algae". J. Gen. Microbiol., **16** (1): 282-85. London, 1957.
- SZAREJKO-LUKASZEWICZ, D. "Qualitative investigations of phytoplankton of the Firth of Vistula in 1953". Rep. Sea Fish. Inst. Gdynia, **9**: 439-51. Gdynia, 1957.
- WAWRIK, F. "Interessante Florenelemente in der pelagischen Diatomeenvegetation des Golfes von Neapel". Pubbl. Staz. Zool. Napoli, **30** (2): 269-78. Napoli, 1957.

### 3) e Productivity

- BERGE, G. "The primary production in the Norwegian Sea in June 1954, measured by an adapted  $^{14}\text{C}$  technique". ICES, R. et P.-V., **144**: 85-91. Copenhagen, 1958.
- BERNARD, F. "Données récentes sur la fertilité élémentaire en Méditerranée". ICES, R. et P.-V., **144**: 103-08. Copenhagen, 1958.
- BOGOROV, B. G. "Estimates of primary production in biogeographical regionization of the ocean". ICES, R. et P.-V., **144**: 117-21. Copenhagen, 1958.
- COOPER, L. H. N. "Consumption of nutrient salts in the English Channel as a means of measuring production". ICES, R. et P.-V., **144**: 35-37. Copenhagen, 1958.
- CORLETT, J. "Measurements of primary production in the western Barents Sea". ICES, R. et P.-V., **144**: 76-78. Copenhagen, 1958.
- CURRIE, R. I. "Some observations on organic production in the north-east Atlantic". ICES, R. et P.-V., **144**: 96-102. Copenhagen, 1958.
- CUSHING, D. H. "Some experiments using the  $^{14}\text{C}$  technique". ICES, R. et P.-V., **144**: 73-75. Copenhagen, 1958.

- CUSHING, D. H. "The effect of grazing in reducing the primary production: a review". ICES, R. et P.-V., **144**: 149-54. Copenhagen, 1958.
- DOTY, M. S., & OGURI, M. "Selected features of the isotope carbon primary productivity technique". ICES, R. et P.-V., **144**: 47-55. Copenhagen, 1958.
- FEDOSOV, M. V. "Investigations of the chemical basis of productivity in sea basins". ICES, R. et P.-V., **144**: 61-64. Copenhagen, 1958.
- FOGG, G. E. "Extracellular products of phytoplankton and the estimation of primary production". ICES, R. et P.-V., **144**: 56-60. Copenhagen, 1958.
- HOLMES, R. W. "Surface chlorophyll 'a', surface primary production, and zooplankton volumes in the eastern Pacific Ocean". ICES, R. et P.-V., **144**: 109-16. Copenhagen, 1958.
- KETCHUM, B. H., *et al.* "Productivity in relation to nutrients". ICES, R. et P.-V., **144**: 132-40. Copenhagen, 1958.
- LUCAS, C. E. "External metabolites and productivity". ICES, R. et P.-V., **144**: 155-58. Copenhagen, 1958.
- NIELSEN, E. S. "Experimental methods for measuring organic production in the sea". ICES, R. et P.-V., **144**: 38-46. Copenhagen, 1958.
- NIELSEN, E. S. "A survey of recent Danish measurements of the organic productivity in the sea". ICES, R. et P.-V., **144**: 92-95. Copenhagen, 1958.
- NIELSEN, E. S. "Light and the organic production in the sea". ICES, R. et P.-V., **144**: 141-48. Copenhagen, 1958.
- STEELE, J. H. "Production studies in the northern North Sea". ICES, R. et P.-V., **144**: 79-84. Copenhagen, 1958.
- WIMPENNY, R. S. "Carbon production in the sea at the Smith's Knoll lightvessel". ICES, R. et P.-V., **144**: 70-72. Copenhagen, 1958.
- WINBERG, G. G. "Quelques questions concernant les méthodes de l'investigation de la production primaire du plancton, basée sur des travaux exécutés en URSS". ICES, R. et P.-V., **144**: 65-69. Copenhagen, 1958.

#### 4) Benthos

##### 4) a General

- BALLOY, M. "Résultats de quelques expériences sur l'élevage d'animaux et d'algues en aquarium d'eau de mer fonctionnant en circuit fermé". Rev. Trav. Inst. Pêches Marit., **21** (4): 555-60. Paris, 1957.
- EMERY, K. "Bacterial bottom sampler". Limnol. & Oceanogr., **3** (1): 109-11. Baltimore, 1958.
- IVANOVA, S. S. "Qualitative and quantitative characteristics of the benthos of Onezhsk Bay, White Sea". Materials for a Complex Study of the White Sea, **1**: 355-80. Moscow, 1957.
- RODINA, A. G. "The possibility of using the radioactive tracer method for the solution of the food selection problem in aquatic animals". Zool. Zhurn., **36** (3): 337-43. Moscow, 1957.

##### 4) b Fauna, Systematics and Development

- ADAM, W. "Notes sur les cephalopodes. XXIII. Quelques espèces des Antilles". Bull. Inst. Roy. Sci. Natur. Belgique, **33** (7). Bruxelles, 1957.
- ATKINS, D. "British pea-crabs (Pinnitheres)". Nature, **181** (4615): 1087. London, 1958.
- BATTAGLIA, B., & TALAMINI, P. "Osservazioni sullo sviluppo larvale de *Tisbe reticulata* Bocquet (Copepoda, Harpacticoida)". Arch. Oceanogr. e Limnol., **11** (1): 63-68. Venezia, 1957.
- BROWN, A. C. "On an interesting new tanaidacean crustacean from the west coast of South Africa *Tanaidomera columbina*, gen. nov., sp. nov." Ann. & Mag. Natur. Hist., Ser. 12, **10** (119): 817-26. London, 1957.
- CHANGEUX, J.-P. "Description de deux stades larvaires d'un copépode *Cancerillidae*, parasite sur *Ophiopsila aranea* Forbes". Vie et Milieu, **8** (3): 297-311. Paris, 1957.
- CHRETIEN, M. "Histologie et développement de l'ovaire chez *Alcyonidium gelatinosum* (L.) (Bryozaire cténostome)". Bull. Lab. Marit. Dinard, **43**: 25-51. Dinard, 1957.
- COSTLOW, J. D. "Shell development in *Balanus improvisus* Darwin". J. Morphol., **99** (2): 359-415. Philadelphia, 1956.

- D'YAKONOV, A. M. "Ophiuroidea of the seas of the U.S.S.R." Akad. Nauk SSSR, Moscow & Leningrad, 1954.
- ELLIOTT, G. F. "An abnormal lophophore in *Macandrevia* (Brachiopoda)". Univ. Bergen Årbok 1958 (2). Bergen, 1958.
- FIGUEIRA, A. J. G. "Madeiran decapod crustaceans in the collection of the Museu Municipal do Funchal. I. On some interesting deep-sea prawns of the families Pasiphaeidae, Ophiophoridae and Pandalidae". Bol. Mus. Municip. Funchal, 10 (26): 22-51. Funchal, Madeira, 1957.
- FOREST, J. "Une réunion carcinologique à Barcelone". Bull. Mus. Nation. Hist. Natur., 29 (5): 421-27. Paris, 1957.
- FRYER, G. "Occurrence of spermatophores in the genus *Dolops* (Crustacea: Branchiura)". Nature, 181 (4614): 1011-12. London, 1958.
- GRELLET, P. "Histologie du testicule et spermatogénèse chez *Alcyonidium gelatinosum* (L.) (Bryozoaire cténostome)". Bull. Lab. Marit. Dinard, 43: 3-24. Dinard, 1957.
- JONES, M. L. "On the morphology of the nephridium of *Nereis vexillosa* Grube". Biol. Bull., 113 (3): 407-13. Lancaster, Pa., 1957.
- LEVI, C. "Spongiaires des côtes d'Israël". Bull. Res. Council. Israel, 6B (3-4): 201-12. Haifa, 1957.
- PETERSEN, G. H. "Distinction between *Cardium edule* L. and *Cardium lamarcki* Reeve". Nature, 181 (4605): 356-57. London, 1958.
- PICARD, J. "Études sur les hydroïdes de la superfamille Pteronematoidea. I. Généralités". Bull. Inst. Océanogr., 1106. Monaco, 1957.
- RYLAND, J. S. "*Bugula simplex* Hincks, a newly recognized Polyzoan from British waters". Nature, 181 (4616): 1146-47. London, 1958.
- STEINBERG, J. E. "The skeleton shrimps (Crustacea: Caprellidae) of the Gulf of Mexico". Tulane Stud. Zool., 5 (11). New Orleans, 1957.
- TIXIER-DURIVAUT, A. "Le genre *Sphaerella* Gray". Bull. Mus. Nation. Hist. Natur., 29 (6): 493-95. Paris, 1957.
- WARBURTON, F. E. "Boring sponges, *Cliona* species, of eastern Canada, with a note on the validity of *C. lobata*". Canadian J. Zool., 36 (2): 123-25. Ottawa, 1958.
- ZIEGELMEIER, E. "Die Muscheln (Bivalvia) der deutschen Meeresgebiete (Systematik und Bestimmung der Heimischen Arten nach ihren Schalenmerkmalen)". Helgoländer Wiss. Meeresunters., 6 (1): 1-51. List (Sylt), 1957.

#### 4) c Fauna, Distribution and Ecology

- ALLEN, J. A. "Observations on *Cochlodesma praetenu* (Pulteney) (Eulamellibranchia)". J. Mar. Biol. Assoc., 37 (1): 97-112. Cambridge, 1958.
- ANCELLIN, J. "Observations sur la faune et les fonds de pêche de quelques secteurs de la Manche et des mers nordiques". Rev. Trav. Inst. Pêches Marit., 21 (4): 449-84. Paris, 1957.
- BAGENAL, T. B. "The vertical range of some littoral animals on St. Kilda". Scottish Natur., 69: 50-51. Edinburgh, 1957.
- BALAVOINE, P. "Nouvelle contribution à l'étude des Bryozoaires de la région de Dinard et de Saint-Malo". Bull. Lab. Marit. Dinard, 43: 52-68. Dinard, 1957.
- BATTAGLIA, B. "Ricerche sul ciclo biologico di *Tisbe gracilis* (T. Scott), (Copepoda, Harpacticoida), studiato in condizioni di laboratorio". Arch. Oceanogr. e Limnol., 11 (1): 29-46. Venezia, 1957.
- BAUCHOT, M.-L., BAUCHOT, R., & LUBET, P. "Étude de la faune ichthyologique du Bassin d'Arcachon (Gironde)". Bull. Mus. Nation. Hist. Natur., 29 (5): 385-406. Paris, 1957.
- BAYER, F. M. "Additional records of western Atlantic octocorals". J. Washington Acad. Sci., 47 (11): 379-90. Washington, 1957.
- BOSSANYI, J. "A preliminary survey of the small natant fauna in the vicinity or the sea floor off Blyth, Northumberland". J. Anim. Ecol., 26 (2): 353-68. Oxford, 1957.
- BUCHANAN, J. B. "The bottom fauna communities across the continental shelf off Accra, Ghana (Gold Coast)". Proc. Zool. Soc. London, 130 (1): 1-77. London, 1958.
- BULICHEVA, A. I. "The amphipod fauna of the White Sea". Materials for a Complex Study of the White Sea, 1: 391-410. Moscow, 1957.
- CARPENTER, D. G. "Distribution of polychaete annelids in the Alligator Harbor area, Franklin County, Florida". Florida State Univ. Stud., 22. Tallahassee, Fla., 1956.
- COLES, J. W. "Nematodes parasitic on sea weeds of the genera *Ascophyllum* and *Fucus*". J. Mar. Biol. Assoc., 37 (1): 145-55. Cambridge, 1958.

- CORBEIL, H.-E. "Inventaire de la faune benthique des bancs de pêche". Rapp. Ann. Stat. Biol. Mar. Dept. Pêch. Québec, 1953: 12–20. Québec, 1954.
- CRISP, D. J., & SOUTHWARD, A. J. "The distribution of intertidal organisms along the coasts of the English Channel". J. Mar. Biol. Assoc., **37** (1): 157–208. Cambridge, 1958.
- ERMOLENKO, V. M. "The fiddler-crab". Priroda, 1957 (12): 115. Moscow, 1957.
- FAUVEL, P. "Contribution à la faune des annélides polychètes des côtes d'Israël. II". Bull. Res. Counc. Israel, **6B** (3–4): 213–19. Haifa, 1957.
- FILATOVA, Z. A. "Zoogeographical division of north seas into districts (about the distribution of bivalve molluscs)". Trudy Inst. Okeanol., Akad. Nauk SSSR, **23**: 195–215. Moscow, 1957.
- FOREST, J. "Sur la validité et le nom des deux espèces d'*Atelecyclus* (Crustacea Decapoda Brachyura)". Bull. Mus. Nation. Hist. Natur., **29** (6): 469–74. Paris, 1957.
- FORNERIS, L. "The geographical distribution of the Copelata". An. Acad. Brasileira Cienc., **29** (2): 273–84. Rio de Janeiro, 1957.
- GAILLARD, J.-M. "Sur une nouvelle station de *Diadumene luciae* (Verrill) dans la région aval de la Rance Maritime". Bull. Lab. Marit. Dinard, **43**: 128–29. Dinard, 1957.
- GAUTIER-MICHAZ, M. "Études sur le Seuil Siculo-Tunisien. 5. Echinodermes". Ann. Inst. Océanogr., **34**: 145–55. Paris, 1958.
- GOSTILOVSKAIA, M. G. "The White Sea polyzoa". Materials for a Complex Study of the White Sea, **1**: 434–71. Moscow, 1957.
- GUINOT, D. "Sur une collection de décapodes brachyours (Portunidae et Xanthidae) de l'île Mayotte. 1. *Portunus (Hellenus) mariei* sp. nov." Bull. Mus. Nation. Hist. Natur., **29** (6): 475–84. Paris, 1957.
- GURIANOVA, E. F. "Brief results of the hydrobiological studies in Mezensk Bay in summer 1952". Materials for a Complex Study of the White Sea, **1**: 252–81. Moscow, 1957.
- DEN HARTOG, C., & SWENNEN, C. "Over het voorkomen van de zeepok *Verruca strömia* in die Nederlandsche wateren". Levende Natuur, **59** (1): 17–20. Amsterdam, 1956.
- HEDLEY, R. H., & UNDERWOOD, C. M. "Living foraminifera and empty shells from the north Kent coast". Ann. & Mag. Natur. Hist., Ser. 12, **10** (118): 721–32. London, 1957.
- HEMPEL, C. "Zur Ökologie einiger Spioniden (*Polychaeta sedentaria*) der deutschen Küsten". Kieler Meeresf., **13** (2): 275–88. Kiel, 1957.
- HIRANO, R., & OSHIMA, Y. "Cultivation and preservation methods of marine protozoa". Bull. Japanese Soc. Sci. Fish., **23** (7 & 8): 420–22. Tokyo, 1957.
- KIRKEGAARD, J. B. "Records of the group Pogonophora in the Skagerrak". Nature, **181** (4615): 1086–87. London, 1958.
- KRISHNASWAMY, S., & JONES, L. T. "Occurrence of *Donsiella limnoriae* Stephensen (Copepoda, Harpacticoida) in the Southampton area". Nature, **181** (4614): 1016. London, 1958.
- KRISTENSEN, I. "The artemis-shell, *Dosinia exoleta*". Levende Natuur, **59** (4): 82–84. Amsterdam, 1956.
- LEVENSTEIN, R. J. "A new and rare deep-water species of polychaetous worms in the bottom fauna of the Bering Sea". Trudy Inst. Okeanol., Akad. Nauk SSSR, **23**: 286–90. Moscow, 1957.
- LEWIS, J. R. "An introduction to the intertidal ecology of the rocky shores of a Hebridean island". Oikos, **8** (2): 130–60. Copenhagen, 1957.
- MARS, P. "Études sur le Siculo-Tunisien. 4. Mollusques testacés". Ann. Inst. Océanogr., **34**: 127–43. Paris, 1958.
- MENZIES, R. J., & BECKMAN, C. "Occurrence of *Limnoria tripunctata* at the Cape Cod Peninsula". Ecology, **39** (1): 172. Durham, N. C., 1958.
- MORALES, E. "El problema de la edad en los cefalopodos". Inst. Invest. Pesqu., Reunión Product. y Pesqu., **3**: 115–17. Barcelona, 1957.
- MULICKI, Z. "Ecology of the more important Baltic invertebrates". Rep. Sea Fish. Inst. Gdynia, **9**: 313–79. Gdynia, 1957.
- PALENICHKO, Z. G., & TINSKOVA, M. N. "Hydrobiological characteristics of Kuz Bay on the White Sea coast". Materials for a Complex Study of the White Sea, **1**: 381–90. Moscow, 1957.
- PAX, F. "Die zoantharien des Golfes von Neapel". Pubbl. Staz. Zool. Napoli, **30** (2): 309–29. Napoli, 1957.
- PÉRÈS, J.-M., & PICARD, J. "Campagne 1955 en Méditerranée Nord-Orientale. 2. Recherches sur les peuplements benthiques". Ann. Inst. Océanogr., **34**: 213–91. Paris, 1958.
- PLESSIS, Y. "Sur un aspect particulier de morphologie littorale et d'écologie marine". Bull. Mus. Nation. Hist. Natur., **29** (6): 529–32. Paris, 1957.

- POSTEL, E. "Premières observations sur les fonds à prairies (*Venus verrucosa*) de la Baie de Saint-Malo". Bull. Mus. Nation. Hist. Natur., **29** (6): 519-28. Paris, 1957.
- REID, G. K. "A summer study of the biology and ecology of East Bay, Texas". Texas J. Sci., **7** (3): 316-43. San Marcos, 1955.
- RUFFO, S. "Studi sui crostacei anfipodi. XLIX. Osservazioni sopra alcune specie di anfipodi trovate a Banyuls su echinodermi". Vie et Milieu, **8** (3): 312-18. Paris, 1957.
- RULLIER, F. "Répartition géographique des annélides polychètes". Bull. Lab. Marit. Dinard, **43**: 69-78. Dinard, 1957.
- SABBADIN, A. "Il ciclo biologico di *Ciona intestinalis* (L.), *Molgula manhattensis* (De Kay) e *Styela plicata* (Lesueur) nella Laguna Veneta". Arch. Oceanogr. e Limnol., **11** (1): 1-28. Venezia, 1957.
- SAVILOV, A. I. "Invertebrates of the White Sea *Mytilus edulis*, *Mya arenaria*, *Balanus balanoides*, their growth and its changes. Part II". Trudy Inst. Okeanol., Akad. Nauk SSSR, **23**: 216-36. Moscow, 1957.
- SLASTNIKOV, G. S. "The polychaete fauna of Onezhsk Bay, White Sea". Materials for a Complex Study of the White Sea, **1**: 411-27. Moscow, 1957.
- SOUTHWARD, A. J. "Note on the temperature tolerances of some intertidal animals in relation to environmental temperatures and geographical distribution". J. Mar. Biol. Assoc., **37** (1): 49-66. Cambridge, 1958.
- SPÄRCK, R. "The importance of metabolism in the distribution of marine animals". Année Biol., **33**: 234-39. Paris, 1957.
- SVESHNIKOV, V. A. "Polychaet species new to the White Sea". Zool. Zhurn., **37** (1): 20. Moscow, 1958.
- TORTONESE, E. "On the echinoderm fauna of Haifa Bay". Bull. Res. Counc. Israel, **6B** (3-4): 189-92. Haifa, 1957.
- DE VALERA, M. "Notes on intertidal ecology in Ireland". Irish Natur. J., **12** (7): 1-5. Belfast, 1957.
- VINOGRADOVA, N. G. "Some peculiarities of the distribution of marine deep-water fauna". Trudy Inst. Okeanol., Akad. Nauk SSSR, **13**: 59-66. Moscow, 1954.
- DE VOS, A. P. C. "Liste annotée des ostracodes marins des environs de Roscoff". Arch. Zool. Expér. et Gén., **95** (1). Paris, 1957.
- VOSS, G. L. "Observations on *Ornithoteuthis antillarum* Adam, 1957, an ommastrephid squid from the West Indies". Bull. Mar. Sci. Gulf & Caribbean, **7** (4): 370-78. Coral Gables, Fla., 1957.
- WESENBERG-LUND, E. "Sipunculoidea from the coast of Israel". Bull. Res. Counc. Israel, **6B** (3-4): 193-200. Haifa, 1957.
- ZMUDZINSKI, L. "The Firth of Vistula zoo-benthos". Rep. Sea Fish. Inst. Gdynia, **9**: 453-500. Gdynia, 1957.

#### 4) d Fauna, Physiology and Behaviour

- ANKEL, W. E. "Begegnung mit *Limulus*". Natur u. Volk, **88** (5): 153-62. Frankfurt a. M., 1958.
- BARNES, H. "Processes of restoration and synchronization in marine ecology. The spring diatom increase and the 'spawning' of the common barnacle, *Balanus balanoides* (L.)". Année Biol., **33**: 67-85. Paris, 1957.
- BARNES, H., & BARNES, M. "The formation of the egg-mass in *Balanus balanoides*". Arch. Soc. Zool.-Bot. Fennica 'Vanamo', **11**: 11-16. Helsinki, 1956.
- BARNES, H., & BARNES, M. "The rate of development of *Balanus balanoides* (L.) larvae". Limnol. & Oceanogr., **3** (1): 29-32. Baltimore, 1957.
- BARNHOLDT, B., & HJARDE, W. "Chromatographic separation of five vitamin A<sub>1</sub> isomers from the eyes of deep-water prawns, *Pandalus borealis*". Acta Physiol. Scandinavica, **41**: 49-67. Stockholm, 1957.
- CORNER, E. D. S., & RIGLER, F. H. "The modes of action of toxic agents. III. Mercuric chloride and n-amymercuric chloride on crustaceans". J. Mar. Biol. Assoc., **37** (1): 85-96. Cambridge, 1958.
- CROGHAN, P. C. "The osmotic and ionic regulation of *Artemia salina* (L.)". J. Exper. Biol., **35** (1): 219-33. Cambridge, 1958.
- CROGHAN, P. C. "The mechanism of osmotic regulation in *Artemia salina* (L.): the physiology of the branchiae". J. Exper. Biol., **35** (1): 234-42. Cambridge, 1958.
- GROGHAN, P. C. "The mechanism of osmotic regulation in *Artemia salina* (L.): the physiology of the gut". J. Exper. Biol., **35** (1): 243-49. Cambridge, 1958.
- HARKER, J. E. "Diurnal rhythms in the animal kingdom". Biol. Rev., **33** (1): 1-52. Cambridge, 1958.

- HEMPEL, C. "Über den Röhrenbau und die Nahrungsaufnahme einiger Spioniden (*Polychaeta sedentaria*) der deutschen Küsten". Helgoländer Wiss. Meeresunters., **6** (1): 100–35. List (Sylt), 1957.
- HICKOK, J. F., & DAVENPORT, D. "Further studies in the behaviour of commensal polychaetes". Biol. Bull., **113** (3): 397–406. Lancaster, Pa., 1957.
- KENNEDY, G. Y., & DALES, R. P. "The function of the heart-body in polychaetes". J. Mar. Biol. Assoc., **37** (1): 15–31. Cambridge, 1958.
- LEVIN, R. A. "The mucilage tubes of *Amphipleura rutilans*". Limnol. & Oceanogr., **3** (1): 111–13. Baltimore, 1958.
- MANWELL, C. "Oxygen equilibrium of *Phascolosoma agassizii* Hemerythrin". Science, **127** (3298): 592. Lancaster, Pa., 1958.
- MEEUSE, B. J. D., & FLUEGEL, W. "Carbohydrases in the sugar-gland juice of *Cryptochiton* (Polyplacophora, Mollusca)". Nature, **181** (4610): 699. London, 1958.
- NEWELL, G. E. "The behaviour of *Littorina littorea* (L.) under natural conditions and its relation to position on the shore". J. Mar. Biol. Assoc., **37** (1): 229–39. Cambridge, 1958.
- NEWELL, G. E. "An experimental analysis of the behaviour of *Littorina littorea* (L.) under natural conditions in the laboratory". J. Mar. Biol. Assoc., **37** (1): 241–66. Cambridge, 1958.
- NICOL, J. A. C. "Luminescence in polynoids. IV. Measurements of light intensity". J. Mar. Biol. Assoc., **37** (1): 33–41. Cambridge, 1958.
- NICOL, J. A. C. "Spectral composition of the light of *Pholas dactylus* L." J. Mar. Biol. Assoc., **37** (1): 43–47. Cambridge, 1958.
- NORTH, W. J., & PANTIN, C. F. A. "Sensitivity to light in the sea-anemone *Metridium senile* (L.): adaptation and action spectra". Proc. Roy. Soc., Ser. B, **148** (932): 385–96. London, 1958.
- PERÉZ-GONZÁLEZ, M. D. "Evidence for hormone-containing granules in sinus glands of the fiddler crab *Uca pugilator*". Biol. Bull., **113** (3): 426–41. Lancaster, Pa., 1957.
- SCHAEFER, R. D., & LANE, C. E. "Some preliminary observations bearing on the nutrition of *Limnoria*". Bull. Mar. Sci. Gulf & Caribbean, **7** (4): 289–96. Coral Gables, Fla., 1957.
- SCHLIEPER, C. "Comparative study of *Asterias rubens* and *Mytilus edulis* from the North Sea and the western Baltic Sea". Année Biol., **33**: 117–27. Paris, 1957.
- SECK, C. "Untersuchungen zur Frage der Ionenregulation bei in Brackwasser lebenden Evertabraten". Kieler Meeresf., **13** (2): 220–43. Kiel, 1957.
- SHCHERBAKOV, A. P. "New data on photo and geotaxis in the lower Crustacea". Uspekhi Sovrem. Biol., **40** (1): 88. Moscow, 1955.
- SHUSTER, C. N. "On the shell of bivalve mollusks". Proc. Nation. Shellf. Assoc., **47**: 34–42. Washington, 1956.
- TRAVIS, D. F. "The molting cycle of the spiny lobster, *Panulirus argus* Latreille. IV. Postecdysial histological and histochemical changes in the hepatopancreas and integumental tissues". Biol. Bull., **113** (3): 451–79. Lancaster, Pa., 1957.
- VERWEY, J. "Influence of temperature on osmotic regulation". Année Biol., **33**: 129–49. Paris, 1957.
- VOVELLE, J. "Remarques sur la structure du tube de *Sabellaria alveolata* (L.) et les formations glandulaires impliquées dans son édification". Arch. Zool. Expér. et Gén., **95** (Notes et Rev. No. 1): 52–68. Paris, 1958.
- WARBURTON, F. E. "Reproduction of fused larvae in the boring sponge *Cliona celata* Grant". Nature, **181** (4807): 493–94. London, 1958.
- YOSHIDA, M. "Positive phototaxis in *Psammechinus microtuberculatus* (Blainville)". Pubbl. Staz. Zool. Napoli, **30** (2): 260–63. Napoli, 1957.
- ZUCKERKANDL, E. "Copper content of the hepatopancreas of *Maia squinado* at various stages between molts". CR Soc. Biol., **151**: 676–79. Paris, 1957.

#### 4) e Flora

- ADAIR, E. J., & VISHNIAC, H. S. "Marine fungus requiring vitamin B<sub>12</sub>". Science, **127** (3290): 147–48. Lancaster, Pa., 1958.
- BIDWELL, R. G. S. "Photosynthesis and metabolism of marine algae. II. A survey of rates and products of photosynthesis in C<sup>14</sup>-carbon dioxide". Canadian J. Bot., **36**: 337–49. Ottawa, 1958.
- BLOMQUIST, H. L. "A new species of *Myriotrichia* Harv. from the coast of North Carolina". J. Elisha Mitchell Sci. Soc., **70** (1): 37–41. Chapel Hill, N. Carolina, 1954.

- BLOMQUIST, H. L. "*Acinetospora* Born. new to North America". J. Elisha Mitchell Sci. Soc., **71** (1): 46-49. Chapel Hill, N. Carolina, 1955.
- CHAPMAN, V. J. "Marine algal ecology". Bot. Rev., **23** (5): 320-50. Lancaster, Pa., 1957.
- DIZERBO, A. H. "Notes sur la flore marine de la côte atlantique de l'Espagne". Collect. Bot. Barcinonensi Bot. Inst. Edita, **5** (1): 269-78. Barcelona, 1957.
- GIBB, D. C. "The free-living forms of *Ascophyllum nodosum* (L.) Le Jol." J. Ecol., **45**: 49-83. London, 1957.
- HAUG, A., & LARSEN, B. "Influence of habitat on the chemical composition of *Ascophyllum nodosum*". Nature, **181** (4617): 1224. London, 1958.
- HUMM, H. J., & JACKSON, C. R. "A collection of marine algae from Guantanamo Bay, Cuba". Bull. Mar. Sci. Gulf & Caribbean, **5** (3): 240-46. Coral Gables, Fla., 1955.
- JACKSON, P. "Harvesting machinery for brown sublittoral seaweeds". Engineer, 1957: 400 & 439. London, 1957.
- JOHNSON, T. W. "Literature on halophilous and halolimnic fungi". Bull. Mar. Sci. Gulf & Caribbean, **7** (4): 330-59. Coral Gables, Fla., 1957.
- JOHNSON, T. W. "Marine fungi. I. *Leptosphaeria* and *Pleospora*". Mycologia, **48** (4): 495-505. New York, 1956.
- JONES, F. R. "Three zoopagales from brackish water". Nature, **181** (4608): 575. London, 1958.
- LAMI, R. "Quelques algues nouvelles pour la région malouine". Bull. Lab. Marit. Dinard, **43**: 130. Dinard, 1957.
- LARSEN, B., & HAUG, A. "Chemical composition of the brown alga *Ascophyllum nodosum* (L.) Le Jol. Presence of reducing compounds in *Ascophyllum nodosum*". Nature, **181** (4617): 1224. London, 1958.
- LEWIN, J. C., LEWIN, R. A., & PHILPOTT, D. E. "*Phaeodactylum tricorutum*". J. Gen. Microbiol., **18**: 418-26. London, 1958.
- LOWENSTAM, H. A. "Aragonite needles secreted by algae and some sedimentary implications". J. Sediment. Petrol., **25** (4): 270-72. Tulsa, Okl., 1955.
- MAIL, R. F. "Catalogue des algues marines du littoral compris entre Fécamp et l'estuaire de la Seine". Bull. Lab. Marit. Dinard, **43**: 94-110. Dinard, 1957.
- PINTNER, I. J., & PROVASOLI, L. "Artificial cultivation of a red-pigmented marine blue-green alga, *Phormidium persicinum*". J. Gen. Microbiol., **18**: 190-97. London, 1958.
- PROVASOLI, L., McLAUGHLIN, J. J. A., & DROOP, M. R. "The development of artificial media for marine algae". Arch. Mikrobiol., **25**: 392-428. Berlin, 1957.
- QUILLET, M. "Volemitol et mannitol chez les phéophycées". Bull. Lab. Marit. Dinard, **43**: 119-24. Dinard, 1957.
- RITCHIE, D. "Salinity optima for marine fungi affected by temperature". American J. Bot., **44** (10): 870-74. Burlington, Vt., 1957.
- SCOTT, G. T., & HAYWOOD, H. R. "Sodium and potassium regulation in *Ulva lactuca* and *Valonia macrophysa*". Electrolytes in Biol. Systems: 35-64. 1955.
- SEMINA, G. I. "The relation between the phytogeographical zones in the pelagial of the north-western Atlantic Ocean and the distribution of water masses in this region". Materials for a Complex Study of the White Sea, **1**: 66-76. Moscow, 1957.
- TAKESITA, I., & KAKUDA, S. "Radioactivity in the river water, brackish water, sea water, and the laver at river mouth, derived from radioactive rainwater". J. Fac. Fish. & Anim. Husb. Hiroshima Univ., **1** (3): 303-10. Fukuyama, 1957.
- WILLIAMS, L. G., & SWANSON, H. D. "Concentration of cesium-137 by algae". Science, **127** (3291): 187-88. Lancaster, Pa., 1958.
- YOUNG, E. G., & LANGILLE, W. M. "The occurrence of inorganic elements in marine algae of the Atlantic provinces of Canada". Canadian J. Bot., **36**: 301-10. Ottawa, 1958.

#### 4) f Bacteria

- NIKITINA, N. S. "The effect of the animal and vegetable population of the littoral on the bacterial composition of sea bottoms". Doklady Akad. Nauk SSSR, **102** (5): 1031-34. Moscow, 1955.
- RITTENBERG, S. C., MITTWER, T., & IVLER, D. "Coliform bacteria around three marine sewage outfalls". Limnol. & Oceanogr., **3** (1): 101-08. Baltimore, 1958.
- TOMLINSON, N., & MACLEOD, R. A. "Nutrition and metabolism of marine bacteria. V. The inhibition of growth of a marine bacterium by amino acids and the development of resistant strains". Arch. Biochem. & Biophys., **70**: 477-90. New York, 1957.
- ZOBELL, C. E., & MORITA, R. Y. "Bacteria in the deep sea". Galathea Deep Sea Exped. 1950-1952: 202-10. George Allen & Unwin Ltd., London, 1956.



## 5) Fishing

## 5) a Statistical Returns

- ANON. "Statistica della pesca e della caccia 1956". Ist. Centr. Statist., Roma, 1956.
- ANON. "Annual report of catch statistics on fishery and aquiculture, 1955". Statist. Bull. Min. Agric., Forestry & Fish., 31-9. Tokyo, 1956.
- ANON. "Dänemarks Fischerei- und Meeresforschung. Jahresbericht 1956". Ferskvandsfiskeribladet, 55 (4): 55-56, and 55 (5): 67-70. København, 1957.
- ANON. "Fisheries review, 1957". Norwegian Fish. News, 4 (4): 5-8. Bergen, 1957.
- ANON. "Lofotfisket 1957". Årsb. Vedk. Norges Fisk., 1957 (5). Bergen, 1958.
- ANON. "Norges fiskerier 1957". Fiskets Gang, 1957 (52): 667-71. Bergen, 1957.
- ANON. "Statistica della pesca e della caccia 1957". Ist. Centr. Statist., Roma, 1957.
- ANON. "Statistical tables". Rep. Prov. British Columbia Dept. Fish. 1956: 101-10. Victoria, B. C., 1957.
- ANON. "Estadística de pesca, año 1956". Min. Comercio, Direcc. Gen. Pesca Marit., Madrid, 1957.
- ANON. "Mengde- og verdiutbyttet av det norske fisket i desember 1957 og januar-desember 1957 og 1956". Fiskets Gang, 1958 (13): 185. Bergen, 1958.
- ANON. "Zeevisserij - trawl en snurrevaad in 1957". Visserij-Nieuws, 1958 (11): 186. 's-Gravenhage, 1958.
- ANON. "Haringdrijfnetvisserij 1957". Visserij-Nieuws, 10 (11): 187. 's-Gravenhage, 1958.
- ANON. "Rapport annuel sur l'évolution de la flotte de pêche en 1957". Min. Commun., Admin. Mar., Belgique, 1958.
- ANON. "Report on the fisheries of Scotland 1957". Scottish Home Dept., Cmnd. 395. HMSO, Edinburgh, 1958.
- FISCHER, E. "Die Fangerträge der Ostsee- und Küstenfischerei der DDR in den Jahren 1946-1951". Deutsche Fisch. Zeit., 8: 228-35. Radebeul, 1955.
- HILDEBRANDT, A. G. U. "Visserijen Euromarkt". Visserijwereld, 17 (11): 3 & 5. 's-Gravenhage, 1958.
- LASZCZYNSKI, S. "Yield of Baltic catches in 1953-1954 in the light of previous years". Rep. Sea Fish. Inst. Gdynia, 9: 705-38. Gdynia, 1957.
- MARTIN, W. R., & SULLIVAN, G. J. W. "Landings of Atlantic groundfish in Canada (excluding Newfoundland) 1954". Fish. Res. Board Canada, Biol. Stat. St. Andrews, Statist. Ser. Circ., 8. St. Andrews, N. B., 1957.
- MARTIN, W. R., & SULLIVAN, G. J. W. "Landings of Atlantic groundfish in Canada (excluding Newfoundland) 1955". Fish. Res. Board Canada, Biol. Stat. St. Andrews, Statist. Ser. Circ., 9. St. Andrews, N. B., 1957.
- MOLLESTAD, S. "Fiskeflåten 1957". Fiskets Gang, 1958 (2): 18-24. Bergen, 1958.
- MOLLESTAD, S. "Selfangsten og håkjerringfisket i 1957". Fiskets Gang, 1958 (8): 110-12. Bergen, 1958.
- OPPEDAL, G. "Lofotfiskets lønnsomhet 1957". Fiskets Gang, 1957 (4): 44-56. Bergen, 1957.
- OPPEDAL, G. "Vintersildfiskets lønnsomhet 1957". Fiskets Gang, 1958 (9): 122-31. Bergen, 1958.
- POWER, E. A. "Fisheries of the United States and Alaska, 1957. A preliminary review. Catch of fish and shellfish, 1950-1957". US Dept. Inter., Fish & Wildl. Serv., Fish. Leaflet, 393. Washington, 1958.
- RAHN, J. "Die Fischerei auf dem Sacrower See in den Jahren 1949-1955". Zeitschr. Fisch. Hilfswiss., 6 (8): 561-88. Berlin, 1957.

## 5) c Gear

- ANON. "Abfischungsergebnisse mit dem Elektrofanggerät 'Hamburg II'". Wiss. Inform. Fischereipraxis, 4 (6): 132-33. Hamburg, 1957.
- ANON. "Die Arbeitsweise der russischen Fischpumpe". Wiss. Inform. Fischereipraxis, 4 (6): 136. Hamburg, 1957.
- ANON. "Lobster pots that fold and last". Fishing News, 2348: 11. London, 1958.
- ARON, W. "Preliminary report of midwater trawling studies in the North Pacific Ocean". Techn. Rep. Dept. Oceanogr. Univ. Washington, 58. Washington, 1958.
- BARRACLOUGH, W. E., & NEEDLER, A. W. H. "Development of a new herring trawl for use in midwater or on the bottom". Canadian Fisherman, 44: 3, 5, & 11. Montreal, 1957.
- BEN-YAMI, M. "Preliminary report on experimental fishing with an improved type of trawl-net". Gen. Fish. Council. Mediterranean, Proc. & Techn. Pap., 4 (Techn. Pap. 35): 269-80. Rome, 1957.

- BEN-YAMI, M. "Measurements of trawl gear by means of underwater equipment". *Fishermen's Bull.*, **15**: 29–31. Haifa, 1958.
- BIRSTEIN, J. A., SAVILOV, A. I., & UDINTSEV, G. B. "Trawling at the maximum depth". *Priroda*, 1957 (3): 70–71. Moscow, 1957.
- VON BRANDT, A. "Untersuchungen zur Konservierung von Fischnetzen". *Protok. Fischereitechn.*, **4** (21): 301–57. Hamburg, 1957.
- DEELDER, C. L. "De drijvende kom". *Visserij-Nieuws*, **10** (9): 143–44. 's-Gravenhage, 1958.
- DICKSON, W. "Herring trawling – the Swedish way". *Scottish Fish. Bull.*, **8**: 2–10. Edinburgh, 1957.
- DICKSON, W. "Is 'bang up' bang on?". *World Fishing*, **7** (3): 39–40. London, 1958.
- FAURE, L. "Le panneau éleveur 'Exocet'". *Sci. et Pêche*, **56**. Paris, 1958.
- FUNK, J. L. "The Missouri Conservation Commission's electric seine". *Symp. on Evaluation of Fish Populations in Warm Water Streams*, Iowa State College, March 25, 1957: 85–89. Ames, Iowa, 1957.
- HALSBAND, E. "Die Anwendung des Impulsstromes in der Elektrofischerei". *Fischwirt*, **6** (6): 155–59. Hamburg, 1956.
- HAMURO, C. "Study on the automatic net depth meter for the crab tangle net at its practical application". *Techn. Rep. Fish. Boat*, **8**: 83–102. Tokyo, 1956.
- HAMURO, C. "Analysis of two-boat trawling net by automatic net height meter by measuring simultaneously two points of the net". *Techn. Rep. Fish. Boat*, **10**: 19–40. Tokyo, 1957.
- HAMURO, C., & ISHII, K. "Study on the automatic net depth meter, automatic net length meter for salmon gill net and the results of measurement at sea". *Techn. Rep. Fish. Boat*, **8**: 29–82. Tokyo, 1956.
- HAMURO, C., & ISHII, K. "Automatic net-height meter measuring simultaneously two points of the trawl net, and results of experiments for these apparatuses". *Techn. Rep. Fish. Boat*, **9**: 109–63. Tokyo, 1956.
- HAMURO, C., & ISHII, K. "Analysis of tuna long-line by automatic depth meters". *Techn. Rep. Fish. Boat*, **11**: 39–120. Tokyo, 1958.
- HASHIMOTO, T., *et al.* "Study on simplified SONAR of 200 kc ultrasound and its field test". *Techn. Rep. Fish. Boat*, **8**: 119–30. Tokyo, 1956.
- HASHIMOTO, T., & MANIWA, Y. "Ultrasonic reflection loss of fish shoal and characteristics of the reflected wave". *Techn. Rep. Fish. Boat*, **6**: 113–40. Tokyo, 1955.
- HASHIMOTO, T., & MANIWA, Y. "Study on reflection loss of ultrasonic wave on fish-body by millimeter wave". *Techn. Rep. Fish. Boat*, **8**: 113–18. Tokyo, 1956.
- HASHIMOTO, T., & MANIWA, Y. "Experiment of fish-finding at fishing-ground of salmon in the North Pacific Ocean". *Techn. Rep. Fish. Boat*, **8**: 131–50. Tokyo, 1956.
- HASHIMOTO, T., MANIWA, Y., & NISHIMURA, M. "Experiment on difference between 24 kc fish-finder and 200 kc fish-finder". *Techn. Rep. Fish. Boat*, **10**: 79–86. Tokyo, 1957.
- HASHIMOTO, T., MANIWA, Y., & NISHIMURA, M. "Study on simplified record type SONAR and its field test". *Techn. Rep. Fish. Boat*, **10**: 95–100. Tokyo, 1957.
- HASHIMOTO, T., & NISHIMURA, M. "Study on application of echo-sounder for fishing-ground of crab at the Okhotsk Sea, western waters of Kamchatsker peninsula". *Techn. Rep. Fish. Boat*, **8**: 151–69. Tokyo, 1956.
- HASHIMOTO, T., NISHIMURA, M., & MANIWA, Y. "Noise of yellowtail when it comes into the set net – relation between the noise and amount of catch – relation between the intensity of noise and weather". *Techn. Rep. Fish. Boat*, **10**: 69–78. Tokyo, 1957.
- HATTOP, H.-W. "Entwicklung und Perspektiven der Elektrofischerei in unseren Binnen-gewässern". *Deutsche Fisch. Zeit.*, 1957 (12): 361–67. Radebeul, 1957.
- HATTOP, H.-W. "Die Bedeutung des Netzstromes für die Elektrofischerei". *Zeitschr. Fisch. Hilfswiss.*, **6** (1–7): 371–83. Berlin, 1957.
- HONDA, H. "On the line disused after tuna long-line fishings". *Bull. Japanese Soc. Sci. Fish.*, **23** (7 & 8): 383–87. Tokyo, 1957.
- IITAKA, Y. "Study on the fishing capacities of purse seines. 3. On the difference between cotton and Kyokurin purse seines". *Bull. Japanese Soc. Sci. Fish.*, **23** (7 & 8): 344–47. Tokyo, 1957.
- IITAKA, Y. "Model experiments on the sardine purse seine operating in Hyuganada – V". *Bull. Japanese Soc. Sci. Fish.*, **23** (9): 511–13. Tokyo, 1958.
- ISOUTI, N., & KAWAKAMI, T. "Mechanical characteristics of plate depressors for trolling". *Bull. Japanese Soc. Sci. Fish.*, **23** (7 & 8): 354–57. Tokyo, 1957.
- IYIGÜNGÖR, D. "Méthodes et moyens de pêche au thon actuellement en usage en Turquie". *Gen. Fish. Council. Mediterranean, Proc. & Techn. Pap.*, **4** (Techn. Pap. 33): 251–55. Rome, 1957.

- JAKOBSSON, J. "Sildveiditilraunir b. v. Neptunusar 1956". *Ægir*, 49 (22). Reykjavik, 1956.
- KAJEWSKI, G. "Gedanken zur Systematik der fischereilichen Fanggeräte". *Zeitschr. Fisch. Hilfswiss.*, 6 (1-7): 397-403. Berlin, 1957.
- KAWASAKI, G., NISHIYAMA, S., & NAKAMURA, H. "Studies on the beach seines of two-boat operation along the Pacific coast of Aomori Prefecture. I. On the construction of the beach seine of two-boat operation used for both mackerel and sardine fishing". *Bull. Fac. Fish. Hokkaido Univ.*, 8 (2): 108-14. Hakodate, 1957.
- KISELEV, O. N. "The use of echo sounders in industrial exploration". *Materials for a Complex Study of the White Sea*, 1: 489-94. Moscow, 1957.
- KNAKE, B. O. "Assembly methods for otter-trawl nets". *US Dept. Inter., Fish & Wildl. Serv., Fish. Leaflet*, 437. Washington, 1956.
- KULOW, H. "Der Entwicklungsstand des Schwimmtrawls". *Zeitschr. Fisch. Hilfswiss.*, 6 (1-7): 405-13. Berlin, 1957.
- KUMAGORI, T., HAMURO, C., & ISHII, K. "Automatic net-height meter and automatic ground rope indicator for trawler and results of experiment for these apparatuses". *Techn. Rep. Fish. Boat*, 6: 41-92. Tokyo, 1955.
- LARSSON, K.-H. "Scandinavian experience with midwater trawling". *Canadian Fisherman*, 44: 7, 9, & 11. Montreal, 1957.
- LARSSON, K.-H. "Scandinavian experience with mid-water trawling". *World Fishing*, 7 (2): 48-51. London, 1958.
- LOEB, H. A. "Notes on electric fishing techniques". *New York Fish & Game J.*, 5 (1): 100. Albany, N. Y., 1958.
- MANIWA, Y. "Study on the ultrasonic wave form reflected on the sea bottom, fishschools and seaweeds". *Techn. Rep. Fish. Boat*, 11: 157-75. Tokyo, 1958.
- MISTAKIDIS, M. N. "Comparative fishing trials with shrimp nets 1954-1956". *MAFF, Fish. Invest.*, Ser. 2, 22 (1). London, 1958.
- MOLIN, G. "Fishing methods and gear - gill nets". *Svensk Fisk. Tidskr.*, 66: 30. Lund, 1957.
- MORITZ, W. "Durch die Anwendung der neuen Technik zu grösseren Fangerträgen in der Küstenfischerei". *Deutsche Fisch. Zeit.*, 1954 (4): 33-38. Radebeul, 1954.
- NAGAI, M. "Tuna long-line fishing gear and methods". *Tuna Fishing, Kanagawa Pref. Fish. Exper. Stat.*, 42: 27-32. Kanagawa, 1957.
- O'FARRELL, R. C. "Introducing the posser and the flue and stream nets". *Fishing News*, 2345: 9. London, 1958.
- DU PLESSIS, C. G. "Fishing with the South African pursed lampara". *World Fishing*, 7 (3): 57-58. London, 1958.
- SCHLIEKER, E. "Probleme des Baues und der Anwendung von Grossreusen". *Zeitschr. Fisch. Hilfswiss.*, 6 (1-7): 531-58. Berlin, 1957.
- SHEMANSKY, J. A. "The use of sound in fishery". *Priroda*, 1958 (2): 104. Moscow, 1958.
- STEINBERG, R. "Unterwassergeräusche und Fischerei". *Protok. Fischereitechn.*, 4 (21): 216-49. Hamburg, 1957.
- SUZUKI, O. "On the relation between the length of ground rope of a Danish seine and the variation of its gape". *Bull. Japanese Soc. Sci. Fish.*, 23 (9): 514-17. Tokyo, 1958.
- SZATYBELKO, M. "Studies on the factors influencing the yield of captivating salmon and trout gear". *Rep. Sea Fish. Inst. Gdynia*, 9: 565-96. Gdynia, 1957.
- VLADYKOV, V. D. "Deux pêches caractéristiques du Fleuve St-Laurent". *Actual. Mar., Dept. Pêch. Prov. Québec*, 2 (1): 6. Québec, 1958.
- WOJAN, S. "Fishing technological examinations of net fabrics produced from polan, ramii, cotton and hemp". *Rep. Sea Fish. Inst. Gdynia*, 9: 597-632. Gdynia, 1957.

### 5) d Grounds and Fishing Surveys

- ANON. "Japanese fisheries - their development and present status". *Asia Kyokai*, Tokyo, 1957.
- BEN-TUVIA, A. "Pelagic fisheries in Israel". *Gen. Fish. Counc. Mediterranean, Proc. & Techn. Pap.*, 4 (Techn. Pap. 45): 383-91. Rome, 1957.
- DUNN, J. S. "Ten years of technical progress in the South African fishing industry". *Mem. Fish. Industr. Res. Inst.*, 86. Cape Town, 1958.
- ERASTOVA, V. M. "Characteristics of the White Sea fishery of the Karelian Republic". *Materials for a Complex Study of the White Sea*, 1: 243-51. Moscow, 1957.
- MCHUGH, J. L., & BAILEY, R. S. "History of Virginia's commercial fisheries. Neglected historical records throw light on today's problems". *Virginia J. Sci.*, 8 (1): 42-64. Charlottesville, 1957.

- MEYER-WAARDEN, P. F., & VON BRANDT, A. "Die Fischwirtschaft in der Bundesrepublik Deutschland". Westliche Berliner Verlag, Berlin, 1957.
- PERLMUTTER, A. "Sea fisheries - report to the government of Israel". USOM Agric. Rep., 13. Tel-Aviv, 1956.
- RUTKOWICZ, A. K. St. "Fishing atlas of the North Sea". Panstwowe Przedsiębiorstwo Wydawnictw Kartograficznych, Warszawa, 1957.
- SALZEN, E. A. "A trawling survey off the Gold Coast". ICES, J. Cons., 23 (1): 72-82. Copenhagen, 1957.

### 5) e Technology

- ALFONSO, C. G., & BERTRAN, E. C. "The preservation of fish. Enzymic topography of various species". An. Inst. Invest. Vet., 6: 129-44. Madrid, 1954.
- ANON. "New vessel fish-icing techniques prove value to New England fisheries". Commerc. Fish. Rev., 19 (Nov.): 8. Washington, 1957.
- BOROWIK, J., *et al.* "Investigations on the influence of sodium nitrited ice on the durability and quality of the Baltic cod". Rep. Sea Fish. Inst. Gdynia, 9: 633-79. Gdynia, 1957.
- PETERS, J. A., & SLAVIN, J. W. "Comparative keeping quality, cooling rates, and storage temperatures of haddock held in fresh-water ice and in salt-water ice". Commerc. Fish. Rev., 20 (1): 6-13. Washington, 1958.
- TRESSLER, D. K., & LEMON, J. McW. "Marine products of commerce. Their acquisition, handling, biological aspects and the science and technology of their preparation and preservation". 2nd Edit., Reinhold Publ. Corp., New York, 1957.

## 6) Fish

### 6) a Cod

- ANON. "La production de morue en France et dans le monde". Pêche Marit., 959: 69-71. Paris, 1958.
- BERNER, M., & SCHEMAINDA, R. "Über den Einfluss der hydrographischen Situation - insbesondere des Durchlüftungszustandes - auf die vertikale Verteilung und den Fang der Laichdorschwärme im Bornholmbecken". Zeitschr. Fisch. Hilfswiss., 6 (1-7): 331-42. Berlin, 1957.
- CHRZAN, R. "The state of cod stock in the south-eastern Baltic in 1952-1954". Rep. Sea Fish. Inst. Gdynia, 9: 7-43. Gdynia, 1957.
- CORBELL, H. E. "Analyse du contenu stomacal de la morue (*Gadus callarias*)". Dépt. Pêch. Québec, Rapp. Ann. Stat. Biol. Mar. 1953: 48-59. Québec, 1954.
- DANNEVIG, A., DEMENTJEVA, T., HANSEN, P. M., JONSSON, J., KNUDSEN, J., MASLOV, J., MEYER, A., OTTERLIND, G., & RUTKOWICZ, ST. "Cod". ICES, Ann. Biol., 13. Copenhagen, 1958.
- DEMEL, K., & PIATEK, W. "Cod catches in the Bay of Gdansk in 1949-1953 in the aspect of hydrographic and climatic factors". Rep. Sea Fish. Inst. Gdynia, 9: 79-102. Gdynia, 1957.
- FLEMING, A. M. "The commercial longlining experiment, St. Anthony, Newfoundland, 1955". Fish. Res. Board Canada, Progr. Rep. Atlantic Coast Stat., 68: 9-14. St. Andrews, 1958.
- GRAUMAN, A. B. "Materials on the feeding of Baltic cod larvae in the 1955 collections". Trudy Baltiro, 2: 58-63. Kaliningrad, 1956.
- JEAN, Y. "La morue". Dépt. Pêch. Québec, Rapp. Ann. Stat. Biol. Mar. 1953: 114-26. Québec, 1954.
- JONES, N. R. "The estimation of free sugars in skeletal muscle of codling (*Gadus callarias*) and herring (*Clupea harengus*)". Biochem. J., 68 (4): 704-08. Cambridge, 1958.
- JÓNSSON, J. "Gengur islenzki þorskurinn til Austur Grænlands?" Ægir, 51 (2). Reykjavik, 1958.
- LOVE, R. M. "North Sea cod. I. Muscle cell dimensions". J. Sci. Food & Agric., 9: 195-98. London, 1958.
- LOVE, R. M. "North Sea cod. II. Deoxyribonucleic acid in the musculature". J. Sci. Food & Agric., 9: 199-203. London, 1958.
- MACIEJCZYK, J. "Losses in weight and yield of production at evisceration, beheading and filleting of cod on an industrial scale". Rep. Sea Fish. Inst. Gdynia, 9: 681-703. Gdynia, 1957.

- ROY, H. "Fischpankreas als Rohstoffquelle für die Insulingewinnung unter besonderer Berücksichtigung des Dorsch (Gadus morrhua)". Zeitschr. Fisch. Hilfswiss., 6 (1-7): 469-87. Berlin, 1957.
- SAUVEROCHE, M. "Depuis quelques années, la production française de morue salée a pris une des premières places dans le monde". Pêche Marit., 959: 75-77. Paris, 1958.
- SONINA, M. A. "The White Sea cod". Materials for a Complex Study of the White Sea, 1: 230-42. Moscow, 1957.
- SPASSKII, N. N., & MEREZHINSKAIA, S. M. "Feeding of the Baltic cod (according to the material for 1955)". Trudy Baltiuro, 2: 64-74. Kaliningrad, 1956.
- TEMPLEMAN, W. "How cod spawn - Nielsen's observations". Fish. Res. Board Canada, Progr. Rep. Atlantic Coast Stat., 68: 15-17. St. Andrews, 1958.
- ZUKOWSKI, C. "Investigations on the cod in the southern part of the Bornholm Basin in the years 1951-1952". Rep. Sea Fish. Inst. Gdynia, 9: 45-78. Gdynia, 1957.

#### 6) b Haddock

- JONES, R., MAIN, W., MEYER, A., & SAHRHAGE, D. "Haddock". ICES, Ann. Biol., 13. Copenhagen, 1958.
- JÓNSSON, J. "Er ysan stadbundin í Faxaflóa?". Ægir, 49 (1). Reykjavík, 1956.
- JÓNSSON, J. "Arangurinn af fridun ysunnar í Faxaflóa". Ægir, 49 (8). Reykjavík, 1956.
- TAYLOR, C. C. "Natural mortality rate of Georges Bank haddock". US Dept. Inter., Fish & Wildl. Serv., Fish. Bull., 58 (126): 1-7. Washington, 1958.
- WISE, J. P. "Growth rate of Browns Bank haddock". US Dept. Inter., Fish. & Wildl. Serv., Res. Rep., 50. Washington, 1957.

#### 6) c Hake

- REDEL, E. DE S., & BERLANGE, E. L. "Study of the aerobic heterotrophic bacteria in the roe of European hake (*Merluccius merluccius* L.)". An. Bromatol., 8: 479-81. 1956.

#### 6) d Plaice

- BAGGE, O., BERTELSEN, E., GUILLAND, J. A., JENSEN, A. J. C., KOTTHAUS, A., URSIN, E., & WILLIAMS, T. "Plaice". ICES, Ann. Biol., 13. Copenhagen, 1958.
- HEMPEL, G. "Zur Beziehung zwischen Bestandsdichte und Wachstum in der Schollenbevölkerung der Deutschen Bucht". Ber. Deutschen Wiss. Komm. Meerest., 15 (2): 132-44. Stuttgart, 1958.
- KOLTZER, I. "Leibeshöhlenverhältnisse der Linksformen von *Pleuronectes platessa* L. und *Pleuronectes flesus* L." Zeitschr. Fisch. Hilfswiss., 6 (8): 589-95. Berlin, 1957.
- MASKE, H., et al. "Über die Verteilung von Insulin und Zink in verschiedenen Zellbestandteilen der Rieseninseln bei Fludern und Schollen (*Pleuronectiden*)". Zeitschr. Naturf., 11b (7): 407-15. Tübingen, 1957.
- SIGURDSSON, A. "Skarkolamerkingar í Faxaflóa". Ægir, 49 (16). Reykjavík, 1956.

#### 6) e Sole

- GULLAND, J. A., & WILLIAMS, T. "Sole". ICES, Ann. Biol., 13. Copenhagen, 1958.

#### 6) f Halibut

- ANON. "International Pacific Halibut Commission, 1956". Rep. Prov. British Columbia Dept. Fish. 1956: 84-87. Victoria, B. C., 1957.

#### 6) g Other Marine Demersal Species

- ALTUKHOV, K. A. "Navaga of the White Sea". Materials for a Complex Study of the White Sea, 1: 126-39. Moscow, 1957.
- ALVERSON, D. L., & CHATWIN, B. M. "Results from tagging experiments on a spawning stock of petrale sole, *Eopsetta jordani* (Lockington)". J. Fish. Res. Board Canada, 14 (6): 953-74. Ottawa, 1957.
- BALAGUROVA, M. V. "Materials on the biology of the smelt of Onezhsk Bay in the White Sea". Materials for a Complex Study of the White Sea, 1: 155-84. Moscow, 1957.
- BARSKUOV, V. V. "The variability in the number of rays in the fins of *Anarhichas lupus lupus* L." Doklady Akad. Nauk SSSR, 103 (4): 715-16. Moscow, 1955.

- BERGERON, J. "Pêche expérimentale au poisson rouge". Actual. Mar., Dépt. Pêch., Prov. Québec, 2 (1): 19-22. Québec, 1958.
- BJERKAN, P. "Notes on the Greenland shark *Acanthorhinus carcharias* (Gunn.). 1. The reproduction problem of the Greenland shark". Fiskeridirekt. Skr., Ser. Havunders., 11 (10): 3-7. Bergen, 1957.
- BOHL, H. "Die Biologie der Kliesche (*Limanda limanda* L.) in der Nordsee". Ber. Deutschen Wiss. Komm. Meeresf., 15 (1): 1-57. Stuttgart, 1957.
- DANNEVIG, A., GULLAND, J. A., JONES, R., MAIN, W., & WILLIAMS, T. "Whiting". ICES, Ann. Biol., 13. Copenhagen, 1958.
- DENTON, E. J. "On the vision of the conger eel". J. Physiol., 133: 56-57. London, 1956.
- DENTON, E. J., & WALKER, M. A. "The visual pigment of the conger eel". Proc. Roy. Soc., Ser. B, 148 (931): 257-69. London, 1958.
- EINARSSON, H. "On the post-larval stages of *Ammodytes lancea* Cuvier". Acta Natur. Islandica, 2 (1). Reykjavik, 1955.
- FRIDRIKSSON, A., MASLOV, N., & SCHMIDT, U. "Saithe". ICES, Ann. Biol., 13, Copenhagen, 1958.
- GREEN, J. "*Eudactylina rachelae* n. sp., a copepod parasitic on the electric ray, *Torpedo nobiliana* Bonaparte". J. Mar. Biol. Assoc. U.K., 37 (1): 113-16. Cambridge, 1958.
- GREY, M. "Second specimen of the bathypelagic fish *Photostylus pycnopterus*". Copeia, 1958 (1): 56. Baltimore, 1958.
- HALSTEAD, B. W., et al. "On the morphology of the 'hairs' of the rare deep sea fish *Mirapinna esau*". Ann. & Mag. Natur. Hist., Ser. 12, 10 (118): 767-68. London, 1957.
- HANSEN, P. M. "Wolffish". ICES, Ann. Biol., 13. Copenhagen, 1958.
- HANSEN, P. M., KOTTHAUS, A., & MAGNÚSSON, J. "Redfish". ICES, Ann. Biol., 13. Copenhagen, 1958.
- KNUDSEN, J. "Dab". ICES, Ann. Biol., 13. Copenhagen, 1958.
- KOEFOED, E. "Notes on the Greenland shark *Acanthorhinus carcharias* (Gunn.). 2. A uterine foetus and the uterus from a Greenland shark". Fiskeridirekt. Skr., Ser. Havunders., 11 (10): 8-12. Bergen, 1957.
- MAGNÚSSON, J. "Mikroskopisch-anatomische Untersuchungen zur Fortpflanzungsbiologie des Rotbarsches (*Sebastes marinus* Linné)". Zeitschr. Zellf. u. Mikroskop. Anat., 43: 121-67. Berlin, 1955.
- MOFFETT, A., & RANDALL, J. E. "The 'Roger Firestone' tarpon investigation - progress report". Rep. Mar. Lab. Univ. Miami, 57-22. Virginia Key, Fla., 1957.
- MOSSET, G. "Sur la maturation sexuelle du congre provoquée en aquarium". Bull. Centre Étud. et Rech. Sci. Biarritz, 1 (4): 559-61. Biarritz, 1957.
- NIKOLAEV, A. P. "Navaga of the Onezhsk Bay, in the White Sea". Materials for a Complex Study of the White Sea, 1: 140-54. Moscow, 1957.
- PALMEN, A. T. "A comparison of otoliths and inter-opercular bones as age indicators of English sole". Fish. Res. Pap. Washington Dept. Fish., 1 (4): 5-20. Washington, 1956.
- QASIM, S. Z. "The biology of *Centronotus gunnellus* (L.) (Teleostei)". J. Anim. Ecol., 26 (2): 389-401. Oxford, 1957.
- REIMANN, Z. "Composition of flounder catches (*Pleuronectes flesus* L.) in the region of Gdansk in 1945-1952". Rep. Sea Fish. Inst. Gdynia, 9: 103-50. Gdynia, 1957.
- SADOWSKI, S. "Flounder". ICES, Ann. Biol., 13. Copenhagen, 1958.
- SCHMIDT, U. "Die deutschen Kohleranlandungen 1946/47-1956/57 aus norwegischen und isländischen Gewässern und ihre Abhängigkeit vom Tischbestand". Ber. Deutschen Wiss. Komm. Meeresf., 15 (2): 145-58. Stuttgart, 1958.
- STRAWN, K. "Life history of the pigmy seahorse, *Hippocampus zosterae* Jordan and Gilbert, at Cedar Key, Florida". Copeia, 1958 (1): 16-22. Philadelphia, 1958.
- SWEDMARK, M. "Sur la variation géographique de *Gobius minutus* Pallas. I. Biologie et croissance". Arch. Zool. Expér. et Gén., 95 (Notes et Rev. No. 1): 32-51. Paris, 1958.
- WHEELER, A. C. "The identity of the British fish *Parviclinus spinosus*". Proc. Zool. Soc. London, 130 (2): 253-56. London, 1958.

## 6) h Herring

- AASEN, O., BAXTER, I. G., BIRYUKOV, N., BUCHAN, J. D., DRAGESUND, O., FRIDRIKSSON, A., GLIS, C., HEMPEL, G., JENSEN, A. J. C., MC PHERSON, G., ØSTVEDT, O. J., OTTERLIND, G., PARRISH, B. B., POPIEL, J., POPP MADSEN, K., RANNAK, L., SCHUBERT, K., SELET-SKAJA, A. SHUTOVA-KORZH, I. V., TÄNING, Å. V., WILSON, A. P., YUDANOV, J., & ZIJLSTRA, J. "Herring". ICES, Ann. Biol., 13, Copenhagen, 1958.

- ANCELLIN, J. "Considérations sur les harengs du sud de la Mer du Nord et de la Manche orientale. (Résumé d'observations faites de 1946 à 1955)". ICES, R. et P.-V., **143** (2): 158. Copenhagen, 1958.
- ANCELLIN, J. "Compte rendu préliminaire de la campagne de marquages de harengs à bord du 'Président Théodore Tissier'". Sci. et Pêche, **55**: 1-4. Paris, 1958.
- ANCELLIN, J. "L'influence de la pêche sur le stock de harengs". Sci. et Pêche, **55**: 5-8. Paris, 1958.
- ANDRIASHEV, A. P. "Some problems of amphiboreal distribution with remarks on the possible origins of navaga and oligo-vertebral herring". Materials for a Complex Study of the White Sea, **1**: 117-25. Moscow, 1957.
- ANON. "Conclusions reached at Special Scientific Meeting on herring 'races' held at Charlottenlund on 25.-27. September 1956". ICES, R. et P.-V., **143** (2): 8-9. Copenhagen, 1958.
- ANON. "The East Anglian herring season 1957". MAFF, Lab. Leaflet, **18**. Lowestoft, 1958.
- BALLS, R. "Overfishing or overfeeding? (3). A study of East Anglian fishing changes". World Fishing, **7** (2): 62-66. London, 1958.
- BAXTER, I. G. "The composition of the Minch herring stocks". ICES, R. et P.-V., **143** (2): 81-94. Copenhagen, 1958.
- BIRUKOV, N. I. "Use of the results of calculation of the growth rate of Atlantic-Scandinavian herring for the separation of stages and the study of migration". Problems of Ichthyology (6): 47-54. Moscow, 1956.
- BLAXTER, J. H. S. "The racial problem in herring from the viewpoint of recent physiological evolutionary, and genetical theory". ICES, R. et P.-V., **143** (2): 10-19. Copenhagen, 1958.
- BLAXTER, J. H. S. "The cranial osteology of the herring in racial investigations". ICES, R. et P.-V., **143** (2): 20-21. Copenhagen, 1958.
- BÜCKMANN, A., & HEMPEL, G. "Untersuchungen an der Heringslarvenbevölkerung der Innenjade". Helgoländer Wiss. Meeresunters., **6** (1): 52-70. List (Sylt), 1957.
- BÜCKMANN, A., & HEMPEL, G. "Some results of German investigations on herring larvae". ICES, R. et P.-V., **143** (2): 122. Copenhagen, 1958.
- BURD, A. C. "The North Shields fishery, 1949-55". ICES, R. et P.-V., **143** (2): 124. Copenhagen, 1958.
- CUSHING, D. H. "Some changes in vertebral counts". ICES, R. et P.-V., **143** (2): 126-29. Copenhagen, 1958.
- DUTT, S. "Number of pectoral fin rays". ICES, R. et P.-V., **143** (2): 109-13. Copenhagen, 1958.
- EINARSSON, H. "On the origin and dispersal of Icelandic fish populations with special regard to the herring". Natúrufræðingurinn, **24** (2): 60-91. Reykjavik, 1954.
- EINARSSON, H. "Stærð sunnansildar árin 1931-1954". Ægir, **48** (7 & 8). Reykjavik, 1955.
- EINARSSON, H. "The Icelandic herring and racial problems". ICES, R. et P.-V., **143** (2): 45-52. Copenhagen, 1958.
- FESOLOWICZ, W. "Investigations carried out on the stock of Pomerania Bay spring spawning herring in the years 1950-1954". Rep. Sea Fish. Inst. Gdynia, **9**: 151-73. Gdynia, 1957.
- FRIDRIKSSON, A. "The tribes of the north coast herring of Iceland, with special reference to the period 1948-1955". ICES, R. et P.-V., **143** (2): 36-44. Copenhagen, 1958.
- GILIS, CH. "Recherches sur la biologie du hareng". ICES, R. et P.-V., **143** (2): 146-57. Copenhagen, 1958.
- HASS, G. "Entwicklung und Bedeutung der Industrieringsfischerei deutscher Hochseerkutter in der Nordsee". Zeitschr. Fisch. Hilfswiss., **6** (1-7): 183-89. Berlin, 1957.
- JAKOBSSON, J. "Um sildarleit Ægis og sildarvertidina 1957". Ægir, **50**. Reykjavik, 1957.
- JAKOBSSON, J. "A study of the plankton-herring relationship off the SW-coast of Iceland". Rit. Fiskid., **2** (5). Reykjavik, 1958.
- JEAN, Y. "Le hareng". Dépt. Pêch. Québec, Rapp. Ann. Stat. Biol. Mar. 1953: 21-47. Québec, 1954.
- JENSEN, A. J. C. "Racial investigations on herring, especially adult herring in the Skagerak". ICES, R. et P.-V., **143** (2): 95-98. Copenhagen, 1958.
- JONES, N. R. "The estimation of free sugars in skeletal muscle of codling (*Gadus callarias*) and herring (*Clupea harengus*)". Biochem. J., **68** (4): 704-08. Cambridge, 1958.
- KÄNDLER, R., & DUTT, S. "Fecundity of Baltic herring". ICES, R. et P.-V., **143** (2): 99-108. Copenhagen, 1958.
- KAZANOVA, I. I. "Reproduction of the small Onezhsk herring in 1952". Materials for a Complex Study of the White Sea, **1**: 105-16. Moscow, 1957.

- KREFFT, G. "Counting of gill rakers as a method of morphological herring investigations". ICES, R. et P.-V., **143** (2): 22–25. Copenhagen, 1958.
- KREFFT, G. "Die Jungheringsmarkierung des Internationalen Rates für Meerforschung (ICES) im Jahre 1957". Wiss. Inform. Fischereipraxis, **5** (1): 6–10. Hamburg, 1958.
- KÜHL, H., & TIEWS, K. "Untersuchungen über die deutsche 'Öheringsfischerei' in der Nordsee im Jahre 1956". Ber. Deutschen Wiss. Komm. Meeresf., **15** (1): 58–75. Stuttgart, 1957.
- MARTY, J. J. "Race formation and marine herring races. Biological premises". ICES, R. et P.-V., **143** (2): 60–64. Copenhagen, 1958.
- MIKHAILOVSKAIA, A. A. "Biology and industry of the herring in Onezhsk Bay". Materials for a Complex Study of the White Sea, **1**: 74–89. Moscow, 1957.
- OKONSKI, S., & KONKOL, H. "Daily migration of herring shoals and their reaction to the fishing gear". Rep. Sea Fish. Inst. Gdynia, **9**: 549–63. Gdynia, 1957.
- ØSTVEDT, O. J. "Some considerations concerning the homogeneity of the Atlanto-Scandian herring". ICES, R. et P.-V., **143** (2): 53–59. Copenhagen, 1958.
- PARRISH, B. B., & SHARMAN, D. P. "Some remarks on methods used in herring 'racial' investigations, with special reference to otolith studies". ICES, R. et P.-V., **143** (2): 66–80. Copenhagen, 1958.
- POPIEL, J. "The differentiation of biological groups of the herring in the southern Baltic". ICES, R. et P.-V., **143** (2): 114–21. Copenhagen, 1958.
- POPP MADSEN, K. "Stock composition of the young herring in the Bløden Ground area". ICES, R. et P.-V., **143** (2): 124. Copenhagen, 1958.
- POPP MADSEN, K. "Meristic characters in the young herring of the Bløden Ground area". ICES, R. et P.-V., **143** (2): 123. Copenhagen, 1958.
- POSTUMA, K. H., & ZIJLSTRA, J. J. "On the distinction of herring races in the autumn- and winter-spawning herring of the southern North Sea and English Channel by means of the otoliths and an application of this method in tracing the offspring of the races along the continental coast of the North Sea". ICES, R. et P.-V., **143** (2): 130–33. Copenhagen, 1958.
- RICHARDSON, I. D. "Selection of representative samples in a herring fishery". ICES, R. et P.-V., **143** (2): 125. Copenhagen, 1958.
- RUTKOWICZ, A. K. S. "Fishing atlas of the North Sea". Panstwowe Przedsiębiorstwo Wydawnictw Kartograficznych, Warszawa, 1957.
- SAHRHAGE, D. "Untersuchungen über die Vernichtung untermassiger Schellfische durch die deutsche Heringschleppnetzfisherei in der Nordsee". Ber. Deutschen Wiss. Komm. Meeresf., **15** (2): 105–31. Stuttgart, 1958.
- SAKANO, E. "On the herring found in Akkehi Bay (2)". Sci. Rep. Hokkaido Fish Hatch., **9** (1–2): 177/82. Sapporo, 1954.
- SCATTERGOOD, L. W. "A bibliography of the herring (*Clupea harengus* and *C. pallasii*)". Res. Bull. Maine Dept. Sea & Shore Fish., **26**. Augusta, Maine, 1957.
- SINDERMANN, C. J. "Diseases of fishes of the western North Atlantic. V. Parasites as indicators of herring movements". Res. Bull. Maine Dept. Sea & Shore Fish., **27**. Augusta, Maine, 1957.
- TAMBOVTSIEV, B. M. "Biology and present state of the White Sea herring industry". Materials for a Complex Study of the White Sea, **1**: 44–73. Moscow, 1957.
- TAMURA, T., *et al.* "Some observations on the natural spawning of the spring herring in the western coast of Hokkaido. II. Observations made by diving into water on the natural spawning ground of the herring". Sci. Rep. Hokkaido Fish Hatch., **9** (1–2): 95–112. Sapporo, 1954.
- TAYLOR, F. H. C., HOURSTON, A. S., & OUTRAM, D. N. "The status of the major herring stocks in British Columbia in 1956–57". Rep. Prov. British Columbia Dept. Fish. 1956: 45–77. Victoria, B. C., 1957.
- WALDSCHMIDT-LEITZ, E., & GUDERNATSCH, H. "The structure of protamines. V. Relations between composition and degree of maturity of clupein". Hoppe-Seylers Zeitschr. Physiol. Chem., **309**: 266–75. Berlin, 1958.
- WILSON, A. P. "Biology and industry of the herring in Kandalakshk Bay". Materials for a Complex Study of the White Sea, **1**: 90–104. Moscow, 1957.
- WOOD, H. "Race characters of the herring of the Clyde estuary". ICES, R. et P.-V., **143** (2): 65. Copenhagen, 1958.
- ZIJLSTRA, J. J. "On the spawning communities of the herring of the southern North Sea and the English Channel (preliminary results)". ICES, R. et P.-V., **143** (2): 134–45. Copenhagen, 1958.



ZIJLSTRA, J. J. "Bestaat de Zuiderzeeharing nog?" Visserij-Nieuws, 10 (9): 141-42. 's-Gravenhage, 1958.

#### 6) i Pilchard

- ANDREU, B. "Aplicaciones de la luz intermitente sumergida en la pesca de la sardina". Inst. Invest. Pesqu., Reunión Product y Pesqu., 3: 32-37. Barcelona, 1957.
- BABURINA, E. A. "Structure of the eye and its retina in the common northern pilchard". Doklady Akad. Nauk SSSR, 102 (3): 625-28. Moscow, 1955.
- ELWERTOWSKI, J., JENSEN, A. J. C., LETACONNOUX, R., PINTO, J. S., RAMALHO, A. DE M., & TIAGO DE OLIVEIRA, J. "Sardine". ICES, Ann. Biol., 13. Copenhagen, 1958.
- RODRIGUEZ-RODA, J. "Avance al estudio de la sardina (*Sardina pilchardus* (Walb.)) de barbata y larache y algunas consideraciones generales". Inst. Invest. Pesqu., Reunión. Product. y Pesqu., 3: 29-31. Barcelona, 1957.
- SARDON, F. M. "La elevación del contenido de cenizas del músculo de *Sardina pilchardus* (Walb.) durante el invierno". Inst. Invest. Pesqu., Reunión Product. y Pesqu., 3: 41-43. Barcelona, 1957.

#### 6) j Tunny and Mackerel

- CLEMENS, H. P. "Tuna resources of the tropical and sub-tropical western Atlantic". Trans. American Fish. Soc., 85: 13-17. Ann Arbor, 1957.
- FAURE, L. "Résultats préliminaires de la deuxième campagne 1957 du 'Président Théodore Tissier'". Sci. et Pêche, 52. Paris, 1957.
- HIRAYAMA, N. "On the school of yellow-fin tuna, *Neothunnus rarus* (K.), being supposed from the distribution of catch on tuna long-line". Bull. Japanese Soc. Sci. Fish., 23 (7 & 8): 373-75. Tokyo, 1957.
- IGARISHI, H., ZAMA, K., & KATADA, M. "Lipides of the muscle of tuna, *Thunnus orientalis*. I. Acetone-soluble lipide of the ordinary muscle". Nippon Suisan Gakkaishi, 22: 787-90. Tokyo, 1956-57.
- IGARISHI, H., ZAMA, K., & KATADA, M. "Lipides of the muscle of tuna, *Thunnus orientalis*. II. Acetone-soluble lipide of the dark-coloured muscle". Nippon Suisan Gakkaishi, 22: 791-94. Tokyo, 1956-57.
- KUROGANE, K., & HIYAMA, Y. "Morphometric comparison of the yellowfin tuna taken from the equatorial Pacific". Bull. Japanese Soc. Sci. Fish., 23 (7 & 8): 388-93. Tokyo, 1957.
- NAKAGOME, J. "On the seasonal variation of swimming layers of yellowfin tuna, big-eyed tuna and black marlin in the area of Caroline and Marshall Islands. I. On the seasonal variation of swimming layer". Bull. Japanese Soc. Sci. Fish., 23 (9): 518-22. Tokyo, 1957.
- NAKAGOME, J. "Relation between seasonal variation of swimming layer of yellowfin tuna and big-eyed tuna and vertical distribution of chlorinity". Bull. Japanese Soc. Sci. Fish., 23 (9): 523-24. Tokyo, 1957.
- NAKAGOME, J. "Seasonal variation of hooked-rate and mean fork length and relation among hooked-rate, mean fork length, sexes and migration of black marlin, *Makeira mazara*, in the western Pacific Ocean". Bull. Japanese Soc. Sci. Fish., 23 (9): 525-28. Tokyo, 1957.
- RODA, J. R. "Algunos datos biológicos y estadísticos del atun, *Thunnus thynnus* L., de barbata". Inst. Invest. Pesqu., Reunión Product. y Pesqu., 3: 76-80. Barcelona, 1957.
- RUTKOWICZ, A. K. S. "Fishing atlas of the North Sea". Panstwowe Przedsiębiorstwo Wydawnictw Kartograficznych, Warszawa, 1957.
- SCHAEFER, M. B. "Utilization and conservation of the tuna resources of the eastern tropical Pacific Ocean". Trans. 22nd North American Wildl. Conf.: 472-84. Washington, 1957.
- SCHAEFER, M. B. "A study of the dynamics of the fishery for yellowfin tuna in the eastern tropical Pacific Ocean". Bull. Inter-American Trop. Tuna Commiss., 11 (6). La Jolla, Calif., 1957.
- SHIMADA, B. M. "Geographical distribution of the annual catches of yellowfin and skipjack tuna from the eastern tropical Pacific Ocean from vessel logbook records, 1952-1955". Bull. Inter-American Trop. Tuna Commiss., 11 (7). La Jolla, Calif., 1957.
- DE LA TOURRASSE, G. "La pêche au thon sur la côte basque poursuit sa modernisation". Rev. Trav. Inst. Pêches Marit., 21 (4): 561-92. Paris, 1957.
- TSUJITA, T., & KONDO, M. "Some contributions to the ecology of the mackerel and the oceanography of the fishing grounds in the East China Sea(1)". Bull. Saikai Reg. Fish. Res. Lab., 14: 7-47. Nagasaki, 1957.

## 6) k Other Marine Pelagic Species

- BIGELOW, H. B., & SCHROEDER, W. C. "A large white shark, *Carcharodon carcharias*, taken in Massachusetts Bay". *Copeia*, 1958 (1): 54-55. Philadelphia, 1958.
- DAVIES, D. H. "The South African pilchard (*Sardinops ocellata*) and maasbanker (*Trachurus trachurus*). Young fish survey, 1955-56". Union South African Dept. Commerce & Industr., Invest. Rep. Div. Fish., 29. Cape Town, 1957.
- DAVIES, D. H. "The South African pilchard (*Sardinops ocellata*). Preliminary report on feeding off the west coast, 1953-56". Invest. Rep. Div. Fish., Dept. Comm. & Industr., Union South Africa, 30. Cape Town, 1957.
- DAVIS, W. S. "Ova production of American shad in Atlantic coast rivers". US Dept. Inter., Fish & Wildl. Serv., Res. Rep., 49. Washington, 1957.
- ELWERTOWSKI, J. "Biological characteristic of Polish sprat catches in the Southern Baltic in 1950-1954". Rep. Sea Fish. Inst. Gdynia, 9: 175-219. Gdynia, 1957.
- HARRINGTON, R. W. "Morphometry and ecology of small tarpon, *Megalops atlantica* Valenciennes from transitional stage through onset of scale formation". *Copeia*, 1958 (1): 1-10. Philadelphia, 1958.
- JUNE, F. C. "Variations in meristic characters of young Atlantic menhaden, *Brevoortia tyrannus*". ICES, R. et P.-V., 143 (2): 26-35. Copenhagen, 1958.
- KONDO, K. "Studies of the anchovy scale. I. Difference of the scale characters from various body areas, with a consideration on ecological significance of the grooves". Bull. Tokai Reg. Fish. Res. Lab., 17: 15-25. Tokyo, 1957.
- LOUKASHKIN, A. S., & GRANT, N. "Further studies of the behavior of the Pacific sardine (*Sardinops caerulea*) in an electric field". Proc. California Acad. Sci., 28 (6): 323-37. San Francisco, 1954.
- MACGREGOR, J. S. "Fecundity of the Pacific sardine (*Sardinops caerulea*)". US Dept. Inter., Fish & Wildl. Serv., Fish. Bull., 57 (121). Washington, 1957.
- NIKOLAEV, N. I. "Feeding conditions and growth of the sprats". Trudy Baltiro, 2: 34-45. Kaliningrad, 1956.
- SELETSKAIA, A. V. "On the causes of fluctuation of catches of the sprat in Vislinsk Bay". Trudy Baltiro, 2: 46-57. Kaliningrad, 1956.
- YANAGIMACHI, R. "Studies of fertilization in *Clupea pallasii*. I. Extension of fertilizable life of the unfertilized eggs by means of isotonic Ringer's solution". Zool. Mag., 66 (5): 218-21. Tokyo, 1957.
- YANAGIMACHI, R. "Studies of fertilization in *Clupea pallasii*. II. Structure and activity of spermatozoa". Zool. Mag., 66 (5): 222-25. Tokyo, 1957.
- YANAGIMACHI, R. "Studies of fertilization in *Clupea pallasii*. III. Manner of sperm entrance into the egg". Zool. Mag., 66 (5): 226-33. Tokyo, 1957.

## 6) l Salmon and Trout

- ADKINS, R. J., & FIELDS, P. E. "Conditioning young steelhead trout to colored lights". Techn. Rep. Univ. Washington School Fish., 33: 1-20. Seattle, 1957.
- ALDERDICE, D. F., WICKETT, W. P., & BRETT, J. R. "Some effects of temporary exposure to low dissolved oxygen levels on Pacific salmon eggs". J. Fish. Res. Board Canada, 15 (2): 229-49. Ottawa, 1958.
- ALLAN, I. R. H., ALM, G., CUESTA, J., HARTLEY, W. G., HOWELLS, G., KÄNDLER, R., PYEFINCH, K. A., & SWAIN, A. "Salmon and trout". ICES, Ann. Biol., 13. Copenhagen, 1958.
- ALLISON, L. N. "Multiple sulfa therapy of kidney disease among brook and rainbow trout". Progr. Fish-Cult., 20 (2): 66-68. Washington, 1958.
- ANON. "Report of the International Pacific Salmon Fisheries Commission for 1956". Rep. Prov. British Columbia Dept. Fish. 1956: 78-83. Victoria, B. C., 1957.
- ANON. "The passage of smolts and kelts through fish passes". Scottish Home Dept., HMSO, London, 1957.
- ANON. "Ninth annual report of the Supervisory Committee for Brown Trout Research 1956-1957". Freshw. & Salmon Fish. Res., Scottish Home Dept., 21. HMSO, Edinburgh, 1958.
- BAUCH, G. "Der Elblachs (*Salmo salar* L.), seine Biologie und wirtschaftliche Bedeutung". Zeitschr. Fisch. Hilfswiss., 6 (1-7): 241-50. Berlin, 1957.
- BRETT, J. R. "Salmon research and hydro-electric power development". Bull. Fish. Res. Board Canada, 114. Ottawa, 1957.

- BRETT, J. R., & ALDERDICE, D. F. "Research on guiding young salmon at two British Columbia field stations". Bull. Fish. Res. Board Canada, **117**. Ottawa, 1958.
- BRIDGES, C. D. B. "The visual pigments of the rainbow trout (*Salmo irideus*)". J. Physiol., **134**: 620-29. London, 1956.
- BURROWS, R. E. "Diversion of adult salmon by an electric field". US Dept. Inter., Fish & Wildl. Serv., Spec. Sci. Rep.-Fish., **246**. Washington, 1957.
- DAWSON, K. "Salmon and trout restocking questions". Salmon & Trout Mag., **147**: 151-54. London, 1956.
- DISLER, N. N. "*Oncorhynchus keta* (Walb.)". Trans. Severtsev Inst. Anim. Morphol., **20**: 3-70. Moscow, 1957.
- DONALDSON, L. R., & OLSON, P. R. "Development of rainbow trout brood stock by selective breeding". Trans. American Fish. Soc., **85**: 93-101. Ann Arbor, 1957.
- DUNSTAN, W. A., & BOSTICK, W. E. "New tattooing devices for marking juvenile salmon". Fish. Res. Pap. Washington Dept. Fish., **1** (4): 70-79. Washington, 1956.
- EGUCHI, H., HIKITA, T., & NISHIDA, H. "A comparison between Hokkaido and South Kurile Islands on the salmon egg-number". Sci. Rep. Hokkaido Fish Hatch., **9** (1-2): 151-59. Sapporo, 1954.
- EISLER, R. "The influence of light on the early growth of Chinook salmon". Growth, **21** (3): 197-203. Philadelphia, 1957.
- ELSON, P. F. "The importance of size in the change from parr to smolt in Atlantic salmon". Canadian Fish Cult., **21**: 1-6. Ottawa, 1957.
- FIELDS, P. E., & MURRAY, A. K. "The response of young silver salmon to a light barrier after three levels of light adaptation". Techn. Rep. Univ. Washington School Fish., **27**: 1-9. Seattle, 1956.
- FINGER, G. L., & FIELDS, P. E. "The role of light adaptation on negative phototaxis in silver salmon (*Oncorhynchus kisutch*)". Techn. Rep. Univ. Washington School Fish., **34**: 1-25. Seattle, 1957.
- FISHER, K. C., & SULLIVAN, C. M. "The effect of temperature on the spontaneous activity of speckled trout before and after various lesions of the brain". Canadian J. Zool., **36** (1): 49-63. Ottawa, 1958.
- FOSKETT, D. R., & JENKINSON, D. W. "Contributions to the life-history of the sockeye salmon (No. 42)". Rep. Prov. British Columbia Dept. Fish., 1956: 25-44. Victoria, B. C., 1957.
- GRASSL, E. F. "Relation of a dry pelleted ration to nutritional anemia in brook and rainbow trout". Progr. Fish-Cult., **20** (2): 62-65. Washington, 1958.
- HALVER, J. E., deLONG, D. C., & Mertz, E. T. "Nutrition of salmonoid fishes. V. Classification of essential amino acids for Chinook salmon". J. Nutr., **63**: 95-105. Philadelphia, 1957.
- HIKITA, H. "On an aberrant form of chum salmon taken from the North Pacific Ocean and some examples of salmonoid fishes in Hokkaido". Sci. Rep. Hokkaido Fish Hatch., **10** (1-2): 63-71. Sapporo, 1955.
- JOHNSON, D. E., & FIELDS, P. E. "The application of certain conditioning and handling techniques to the guidance of downstream migrant salmon". Techn. Rep. Univ. Washington School Fish., **35**: 1-56. Seattle, 1957.
- KAI, T. "Studies on the age and growth of rainbow-trout (*Salmo irideus* Gibbons) in Lake Mashyu". Sci. Rep. Hokkaido Fish Hatch., **9** (1-2): 183-204. Sapporo, 1954.
- KOBAYASHI, T. "An ecological study on the salmon fry, *Oncorhynchus keta* (5). The behaviour of chum salmon fry to their seaward migration". Sci. Rep. Hokkaido Salmon Hatch., **12**: 21-30. Sapporo, 1958.
- KUBO, T. "The effect of the control of light upon the rate of smoltification and the growth of body of juvenile masou salmon". Sci. Rep. Hokkaido Fish Hatch., **11**: 19-23. Sapporo, 1956.
- MIHARA, T., & EGUCHI, H. "On the relationship between the average body-length and the average number of adopted eggs of Kokanee salmon (*Oncorhynchus nerka*) observed during the period from 1899 to 1955". Sci. Rep. Hokkaido Salmon Hatch., **12**: 1-6. Sapporo, 1957.
- MILLER, R. B. "The role of competition in the mortality of hatchery trout". J. Fish. Res. Board Canada, **15** (1): 27-45. Ottawa, 1958.
- MURRAY, A. R. "Preliminary biology of Atlantic salmon of the Little Codroy River, Newfoundland". Fish. Res. Board Canada, Progr. Rep. Atlantic Coast Stat., **68**: 20-27. St. Andrews, 1958.

- MURRAY, A. R., & FIELDS, P. E. "Response of steelhead trout (*Salmo gairdnerii*) to continuous, fixed interval and fixed ratio reinforcement schedules". Techn. Rep. Univ. Washington School Fish., 45: 1-10. Seattle, 1957.
- NIELSEN, J. "Mærkningsforsøg med fjeldørred i Grønland". Grønland, 1956 (1): 27-32. København, 1956.
- NISHINO, K., & OZAKI, Y. "Bacteriological investigations on the death in groups of salmon fry. (1). Observations on the *Bacillus* isolated out of dead salmon fry". Sci. Rep. Hokkaido Fish Hatch., 11: 59-64. Sapporo, 1956.
- OKADA, S. S. "The appearance of the death from suffocation in the developing eggs of dog-salmon, *Oncorhynchus keta* (Walbaum)". Sci. Rep. Hokkaido Fish Hatch., 9 (1 & 2): 87-94. Sapporo, 1954.
- OKADA, S. S. "On the change of shape in the blast disc of the unfertilized egg of dog-salmon, *Oncorhynchus keta* (Walbaum) activated by water". Sci. Rep. Hokkaido Fish Hatch., 9 (1-2): 127-32. Sapporo, 1954.
- OKADA, S. S., ISHIKAWA, Y., & KIMURA, G. "On the viability of the sperm and the egg left in the dead body of dog-salmon, *Oncorhynchus keta* (Walbaum)". Sci. Rep. Hokkaido Fish Hatch., 11: 7-17. Sapporo, 1956.
- OKADA, S. S., & ITO, T. "On the activity and fertilizing capacity of sperm in dog-salmon". Sci. Rep. Hokkaido Fish Hatch., 10 (1-2): 21-31. Sapporo, 1955.
- OYA, Y. "The affinity of the spawning type of salmon, *Oncorhynchus keta* Walbaum, which are found in the rivers of Hokkaido". Sci. Rep. Hokkaido Fish Hatch., 9 (1-2): 113-25. Sapporo, 1954.
- PARRY, G. "Size and osmoregulation in salmonid fishes". Nature, 181 (4617): 1218-19. London, 1958.
- PHILLIPS, A. M., *et al.* "The nutrition of trout - Cortland Hatchery report number 23 for the year 1954". Fish. Res. Bull., N.Y.State Conserv. Dept., 18. Albany, N.Y., 1954.
- PHILLIPS, A. M., *et al.* "The nutrition of trout - Cortland Hatchery report number 25 for the year 1956". Fish. Res. Bull., N.Y.State Conserv. Dept., 20. Albany, N.Y., 1956.
- PHILLIPS, A. M., & BROCKWAY, D. R. "The inorganic composition of brown trout blood". Progr. Fish-Cult., 20 (2): 58-61. Washington, 1958.
- PYEFINCH, K. A., & SHEARER, W. M. "The movements of salmon tagged in the sea, Altens, Kincardineshire 1952". Freshw. & Salmon Fish. Res., Scottish Home Dept., 19. HMSO, Edinburgh, 1957.
- RUSHTON, W. "Fish diseases due to bacteria. (2)". Salmon & Trout Mag., 150: 165-211. London, 1957.
- SAKANO, E. "Investigations on the numbers of salmon fry produced by means of artificial hatching. I. The loss of salmon eggs. II. Estimation of number of salmon eggs adopted". Sci. Rep. Hokkaido Fish Hatch., 9 (1-2): 133-36. Sapporo, 1954.
- SALO, E. O., & BAYLIFF, W. H. "Artificial and natural production of silver salmon, *Oncorhynchus kisutch*, at Minter Creek, Washington". Res. Bull. State Washington Dept. Fish., 4. Washington, 1958.
- SANO, S. "Observations on the natural spawning of the salmon *Oncorhynchus keta*. Conditions of the spawning bed". Sci. Rep. Hokkaido Fish Hatch., 10 (1-2): 1-6. Sapporo, 1955.
- SANO, S. "Natural propagation of chum salmon, *Oncorhynchus keta* in Memu river, Tokachi". Sci. Rep. Hokkaido Salmon Hatch., 12: 1-19. Sapporo, 1958.
- SCHUMACHER, R. E. "Experimental feeding of a pelleted trout food to large fingerling and yearling brook, brown, and rainbow trout, 1955-1956". Progr. Fish-Cult., 20 (2): 51-57. Washington, 1958.
- SEDGWICK, D. "A new approach to fish pass design". Salmon & Trout Mag., 150: 100-06. London, 1957.
- SHEARER, W. M. "The movements of salmon tagged in the sea, Montrose, 1954, 1955". Freshw. & Salmon Fish. Res., Scottish Home Dept., 20. HMSO, Edinburgh, 1958.
- SHEPARD, M. P., & STEVENSON, J. C. "Abundance, distribution and commercial exploitation of the fisheries resources of Canada's west coast". Trans. 9th British Columbia Natur. Resourc. Conf., (Feb.). British Columbia, 1956.
- SHIRAIISHI, Y. "On the morphological changes of the salmon fry with the absorption of yolk". Japanese J. Ichthyol., 5 (3/4/5/6): 85-92. Tokyo, 1957.
- SMITH, D. C. W. "The role of the endocrine organs in the salinity tolerance of trout". Mem. Soc. Endocrinol., 5 (2): 83-101. Cambridge Univ. Press, 1956.
- SMITH, I. W. "The occurrence of damaged sea trout on the east coast of Scotland". Salmon & Trout Mag., 150: 148-49. London, 1957.

- SOLEWSKI, W. "The structure and vascularization of the pseudobranch in the rainbow trout *Salmo irideus* Gibb." *Folia Morphol.*, **8** (1): 27-33. Warszawa, 1957.
- STUART, T. A. "The migrations and homing behaviour of brown trout (*Salmo trutta* L.)". *Freshw. & Salmon Fish. Res.*, Scottish Home Dept., **18**. HMSO, Edinburgh, 1957.
- SWAN, M. A. "Brown trout of Loch Kernsary". *Salmon & Trout Mag.*, **150**: 121-27. London, 1957.
- SWIFT, D. R. "Seasonal variations in the growth rate, thyroid-gland activity, and food reserves of brown trout (*Salmo trutta*)". *J. Exp. Biol.*, **32**: 751-64. Cambridge, 1955.
- SZATYBELKO, M. "Studies on the factors influencing the yield of captivated salmon and trout gear". *Rep. Sea Fish. Inst. Gdynia*, **9**: 563-96. Gdynia, 1957.
- TAYLOR, G. T., & LEBRASSEUR, R. J. "Distribution, age and food of steelhead trout *Salmo gairdneri* caught in the northeast Pacific". *Fish. Res. Board Canada, Progr. Rep. Pacific Coast Stat.*, **109**: 9-11. Nanaimo, 1957.
- THREINEN, C. W. "Cause of mortality of a midsummer plant of rainbow trout in a southern Wisconsin lake, with notes on acclimation and lethal temperatures". *Progr. Fish-Cult.*, **20** (1): 27-32. Washington, 1958.
- VIBERT, R. "Méthode pour l'étude et l'amélioration de la survie des alevins de repeuplement (truites et saumons)". *Ann. Stat. Centr. Hydrobiol. Appl.*, **6**: 347-439. Paris, 1956.
- WENT, A. E. J. "Sea trout of the River Ilen". *Salmon & Trout Mag.*, **150**: 139-47. London, 1957.
- YAMAMOTO, T. S. "Some experiments on the chemical changes in the membrane of salmon eggs occurring at the time of activation". *Japanese J. Ichthyol.*, **6** (3): 54-58. Tokyo, 1957.
- YASUTAKE, W. T., & Wood, E. M. "Some Myxosporidia found in Pacific north-west salmonids". *J. Parasitol.*, **43** (6): 633-42. Lancaster, Pa., 1957.

#### 6) m Eels

- ANON. "Der Einfluss der Wassertemperatur auf den Übergang des Gelbaales zum Blankaal". *Fischereiwelt*, **9** (11): 99. Bremerhaven, 1957.
- BAHR, K. "Die Intensivierung des Aalfanges mit Hilfe der Elektrofischerei". *Fischwirt*, **7** (3): 63. Hamburg, 1957.
- CREUTZBERG, F. "Use of tidal streams by migrating elvers (*Anguilla vulgaris* Turt.)". *Nature*, **181** (4612): 857-58. London, 1958.
- D'ANCONA, U. "Nuove ricerche sulla determinazione sessuale dell'*Anguilla*. Parte 2. Le influenze ambientali sul differenziamento della gonade". *Arch. Oceanogr. Limnol.*, **11** (1): 69-111. Venezia, 1957.
- DEELDER, C. L. "Resultaten van de merkproeven met schieraal in 1956 en 1957". *Visserij-Nieuws*, **10** (10): 154-55. 's-Gravenhage, 1958.
- JENSEN, A. J. C., & SAHLIN, S. "Eels". *ICES, Ann. Biol.*, **13**. Copenhagen, 1958.
- MATSUI, I. "On the records of a leptocephalus and catadromous eels of *Anguilla japonica* in the waters around Japan with a presumption of their spawning places". *J. Shimonoseki Coll. Fish.*, **7** (1): 151-67. Shimonoseki City, 1957.
- MØLLER-CHRISTENSEN, E., BRUUN, A. F., & HEMMINGSEN, A. M. "Inducing maturation of the eggs of the European eel by hormone injections". *Acta Endocrinol.*, **28**: 103-11. Copenhagen, 1958.
- SCHMEIDLER, E. "Entwicklung des Glasaalaufstieges in der Ems, seine zeitliche Begrenzung und die auf ihn einwirkende Wassertemperatur". *Zeitschr. Fisch. Hilfswiss.*, **6** (1-7): 141-44. Berlin, 1957.
- ZUKOWSKI, C. "Eel catches in the Firth of Szczecin in the years 1946-1954". *Rep. Sea Fish. Inst. Gdynia*, **9**: 297-311. Gdynia, 1957.

#### 6) n Other Freshwater Species

- HIRATA, H. "Diurnal rhythm of the feeding activity of goldfish in winter and early spring". *Bull. Fac. Fish. Hokkaido Univ.*, **8** (2): 96-107. Hakodate, 1957.

#### 6) o General

- AUERBACH, M. "Hat die Schilddrüse für die Temperaturadaptation der Fische eine Bedeutung?" *Zeitschr. Fisch. Hilfswiss.*, **6** (8): 605-20. Berlin, 1957.
- BACCI, G., & RAZZAUTI, A. "Protogynous hermaphroditism in *Coris julis* L." *Nature*, **181** (4606): 432. London, 1958.

- BAINBRIDGE, R. "The speed of swimming of fish as related to size and to the frequency and amplitude of the tail beat". *J. Exper. Biol.*, **35** (1): 109-33. Cambridge, 1958.
- BAINBRIDGE, R., & BROWN, R. H. J. "An apparatus for the study of the locomotion of fish". *J. Exper. Biol.*, **35** (1): 134-37. Cambridge, 1958.
- BARDACH, J. E. "The sensitivity of the goldfish (*Carassius auratus* L.) to point heat stimulation". *American Natur.*, **90** (854): 309-17. Lancaster, Pa., 1956.
- BAS, C. "Consideraciones sobre el crecimiento diferencial de la cabeza de los peces". *Inst. Invest. Pesqu.*, Reunión Product. y Pesqu., **3**: 92-97. Barcelona, 1957.
- BERTELSEN, E. "A new type of light organ in the deep-sea fish *Opisthoproctus*". *Nature*, **181** (4612): 862-63. London, 1958.
- BEVERTON, R. J. H., & HOLT, S. J. "On the dynamics of exploited fish populations". *MAFF, Fish. Invest.*, Ser. 2, **19**. London, 1957.
- BIRIUKOV, N. P. "Distribution of commercial fish shoals in the southern Baltic in winter and spring, 1956". *Trudy Baltiro*, **2**: 3-33. Kaliningrad, 1956.
- BRANDES, C. H., JENSEN, A. J. C., KÄNDLER, R., KOTTHAUS, A., KREFFT, G., MEYER-WAARDEN, P. F., NYBELIN, O., OTTERLIND, G., RAE, B. B., & WILSON, E. "Various fishes". *ICES, Ann. Biol.*, **13**. Copenhagen, 1958.
- CARLANDER, K. D. "Some simple mathematical models as aids in interpreting the effect of fishing". *Iowa State Coll. J. Sci.*, **32** (3): 395-418. Ames, 1958.
- CLOS, F., SERFATY, A., & CATHALA, M. "Cholinesterase activity of freshwater fish". *Bull. Soc. Hist. Natur. Toulouse*, **92**: 205-17. Toulouse, 1957.
- CORDIER, D., BARNOUD, R., & BRANDON, A. M. "Influence of passage from sea water to fresh water or supersaline sea water on the respiratory exchanges of *Gobius auratus* and *G. lota*". *CR Soc. Biol.*, **151**: 739-42. Paris, 1957.
- DELURY, D. B. "The estimation of population size by a marking and recapture procedure". *J. Fish. Res. Board Canada*, **15** (1): 19-25. Ottawa, 1958.
- DETERLINE, W. A. "An automatic device for the investigation of operant behavior in fish". *American J. Psychol.*, **68**: 291-95. Ithaca, N. Y., 1956.
- DRILHON, A., & FINE, J. M. "Proteins in some species of fish". *CR Acad. Sci.*, **245**: 1676-79. Paris, 1957.
- DURÁN, M. "Sobre la alimentación de los estadios juveniles de la caballa y el jurel". *Inst. Invest. Pesqu.*, Reunión Product. y Pesqu., **3**: 81-83. Barcelona, 1957.
- EKBERG, D. R. "Respiration in tissues of goldfish adapted to warm and cold". *Dissert. Abstr.*, **17** (11): 2659. Washington, 1957.
- FLATIN, J. "Thyroid response to thyrotropic hormone in *Carassius auratus*, as affected by temperature". *Rev. Pathol. Gen. Physiol. Clin.*, **58**: 343-47. France, 1958.
- FONTAINE, M. "The hormonal control of water and salt-electrolyte metabolism in fish". *Mem. Soc. Endocrinol.*, **5** (2): 69-82. Cambridge Univ. Press, 1956.
- GORBUNOV, G. I. "Scientific problems of the fish trade in the Bering and White Seas. (Session of the Murmansk biological station)". *Vestn. Akad. Nauk SSSR*, 1955 (3): 111-12. Moscow, 1955.
- GRODZINSKI, Z. "Some physicochemical properties of the yolk of thermophilic fish". *Acta Biol. Exper.*, **17**: 41-60. Lodz, Poland, 1956.
- HARGIS, W. J. "The host specificity of monogenetic trematodes". *Exper. Parasitol.*, **6** (6): 610-25. New York, 1957.
- HARRINGTON, R. W., & BIDLINGMAYER, W. L. "Effects of dieldrin on fishes and invertebrates of a salt marsh". *J. Wildl. Managem.*, **22** (1): 76-82. Lawrence, Kansas, 1958.
- HEMPEL, G. "Ökologische Studien zum tagesrhythmischen Verhalten von Meeresfischen". *Verhandl. Deutschen Zool. Ges. Hamburg 1956*: 415-21. Hamburg, 1957.
- HOAR, W. S. "Effects of synthetic thyroxine and gonadal steroids on the metabolism of goldfish". *Canadian J. Zool.*, **36** (2): 113-21. Ottawa, 1958.
- IRIE, T. "On the forming season of annual rings (opaque and translucent zones) in the otoliths of several marine teleosts". *J. Fac. Fish. & Anim. Husb. Hiroshima Univ.*, **1** (3): 311-17. Fukuyama, 1957.
- IRVINE, D. G., NEWMAN, K., & HOAR, W. S. "Effects of dietary phospholipide and cholesterol on the temperature resistance of goldfish". *Canadian J. Zool.*, **35**: 691-709. Ottawa, 1957.
- JEAN, Y. "Pêche expérimentale". *Dépt. Pêch. Québec, Rapp. Ann. Stat. Biol. Mar.*, 1953: 126-35. Québec, 1954.
- JENSEN, A. J. C. "Maskernes sortering af fisk og virkningen på fiskeriet af en ændret maskevidde". *Dansk Fiskeritid.*, 1956 (Dec.). København, 1957.

- JOSEPH, E. B., & Yerger, R. W. "The fishes of Alligator Harbor, Florida, with notes on their natural history". Florida State Univ. Stud., **22**, 1956.
- KAPOOR, B. G. "A study on the tongue of fishes". Japanese J. Ichthyol., **6** (4/5/6): 82-86. Tokyo, 1957.
- Kipling, C. "The effect of gill-net selection on the estimation of weight-length relationships". ICES, J. Cons., **23** (1): 51-63. Copenhagen, 1957.
- KLYUCHAREVA, O. A. "Certain questions concerning the intra-species relationships in fish". Zool. Zhurn., **35** (2): 275-89. Moscow, 1956.
- KOBAYASHI, H. "Notes on retino-motor phenomena in some fishes under the various light conditions". J. Shimonoseki Coll. Fish., **7** (1): 169-77. Shimonoseki City, 1957.
- KOEFOED, E. "Isospondyli. 2. Heterophotodermi. (1). (With addenda et corrigenda to Isospondyli 1.)" Rep. Sci. Res. "Michael Sars" North Atlantic Deep-Sea Exped. 1910, **4** (2,6). Bergen, 1958.
- KUROKI, T. "Biophysical studies on the auditory characteristic of fish. I. Directional audibility through one lateral line". Bull. Japanese Soc. Sci. Fish., **23** (7 & 8): 400-04. Tokyo, 1957.
- LANGFORD, H. G. "Production of exophthalmos in *Fundulus heteroclitus* (Var. *Bermudae*) by triiodothyronine and desiccated thyroid". Endocrinol., **60** (3): 290-392. Glendale, Cal., 1957.
- LISSMAN, H. W. "On the function and evolution of electric organs in fish". J. Exper. Biol., **35** (1): 156-91. Cambridge, 1958.
- LISTON, J. "The occurrence and distribution of bacterial types on flatfish". J. Gen. Microbiol., **16**: 205-16. London, 1957.
- LLEWELLYN, J. "The adhesive mechanisms of monogenetic trematodes: the attachment of species of the Diclidophoridae to the gills of gadoid fishes". J. Mar. Biol. Assoc., **37** (1): 67-79. Cambridge, 1958.
- LONG, C. W., & ARZYLOWICZ, R. A. "Photographic device for accurately measuring fish". US Dept. Inter., Fish & Wildl. Serv., Spec. Sci. Rep.-Fish., **228**. Washington, 1957.
- LONGHURST, A. R. "The food of the demersal fish of a West African estuary". J. Anim. Ecol., **26** (2): 369-87. Oxford, 1957.
- LUCAS, J. A. W. "Eikapsels van haaien en roggen". Strand-Werk-Gemeensch. Tabellen-serie, **16**: 1-8. 1956.
- LUTHER, W. "Symbiose von Fischen mit Korallentieren und Krebsen im Roten Meer". Natur u. Volk, **88** (5): 141-46. Frankfurt a. M., 1958.
- MATTY, A. J. "Thyroidectomy and its effect upon oxygen consumption of a teleost fish, *Pseudoscarus guacamaia*". J. Endocrinol., **15** (1): 1-8. London, 1957.
- MAUL, G. E. "Further additions to the previously revised family Searsidae". Bol. Mus. Municip. Funchal, **10** (25): 5-21. Funchal. Madeira, 1957.
- MEKHANIK, F. Y. "On the problem of fish starvation". Zool. Zhurn., **36** (12): 1897-1900. Moscow, 1957.
- MIRONOVA, N. V. "Feeding and growth of young gadoid fishes in the coastal zone of Eastern Murman". Murman Biol. Stat., Moscow & Leningrad, 1956.
- MOHSEN, T. "Masculinizing action of pregnenolone on female gonads in the cyprinodont, *Lebistes reticulatus* R." Nature, **181** (4615): 1074. London, 1958.
- MOISAN, P. "La ligulose des poissons d'eau douce". Thèse pour le Doctorat Vétérinaire prés. et soutenue publiquement devant la Faculté de Médecine de Paris, 1956, **57**. Alfort, 1956.
- MONTREUIL, P. "Parasitological investigations". Rapp. Ann. Stat. Biol. Mar. Dept. Pêch. Québec, 1953: 69-74. Québec, 1954.
- MORI, T., & SAIKI, M. "Radioactivity of fishes contaminated by nuclear-bomb test explosions with special reference to the nuclides". Nippon Nogeikagaku Kaishi, **31**: A79-A86. Tokyo, 1957.
- MUENCH, B. "Quinaldine, a new anesthetic for fish". Progr. Fish-Cult., **20** (1): 42-45. Washington, 1958.
- MUKHACHEVA, V. A. "Eggs and larvae of fishes of Onezhsk Bay, White Sea". Materials for a Complex Study of the White Sea, **1**: 222-29. Moscow, 1957.
- MUNZ, F. W. "Retinal pigments of a labrid fish". Nature, **181** (4614): 1012. London, 1958.
- NIKOLSKY, G. V. "On the effect of the catch on the population structure of food fishes". Zool. Zhurn., **37** (1): 41-56. Moscow, 1958.
- NISHIHARA, H. "Changes of uric acid content in goldfish in sea water". Sci. Rep. Saitama Univ., Ser. B, **2**: 205-11. Urawa, 1956.
- NYBELIN, O. "Deep-sea bottom-fishes". Rep. Swedish Deep-Sea Exped. 1947-1948, **2** (3): 247-345. Göteborg, 1957.

- PETRUSHEVSKII, G. K. "On the questions of the parasite coenoses of fish". Trudy Inst. Zool., Akad. Nauk SSSR, 21: 44. Moscow, 1955.
- PFLUGFELDER, O. "Wirkung von Epiphysan und Thyroxin auf die Schilddrüse epiphysektomierter *Lebistes reticulatus* Peters". Wilhelm Roux' Arch. Entwicklungsmech. Organ., 148 (4): 463-73. Berlin, 1956.
- REID, G. K. "A summer study of the biology and ecology of East Bay, Texas". Texas J. Sci., 7 (3): 316-43. San Marcos, 1955.
- REID, G. K. "Ecological investigations in a disturbed Texas coastal estuary". Texas J. Sci., 8 (3): 296-327. San Marcos, 1956.
- ROBINS, C. R. "The 'Charles F. Johnson' oceanic gamefish investigations. Progress report No. 4. Summary of investigations for the period comprising May 1957 through October 1957". Rep. Mar. Lab. Univ. Miami, 57-28. Miami, Fla., 1957.
- ROBINS, C. R., & RANEY, E. C. "The systematic status of the suckers of the genus *Moxostoma* from Texas, New Mexico and Mexico". Tulane Stud. Zool., 5 (12). New Orleans, 1957.
- RONALD, K. "The metazoan parasites of the Heterosomata of the Gulf of St. Lawrence. I. *Echinorhynchus laurentianus* sp. nov. (Acanthocephala: Echinorhynchidae)". Canadian J. Zool., 35 (437): 437-39. Ottawa, 1957.
- ROSENTHAL, H. L. "The metabolism of strontium-90 and calcium-45 by *Lebistes*". Biol. Bull., 113 (3): 442-50. Lancaster, Pa., 1957.
- SALNIKOV, N. E., & NIKOLAEV, I. I. "On the determination of condition factor in fishes". Trudy Baltiro, 2: 90-95. Kaliningrad, 1956.
- SCHERER, D. "Die fischparasitären Arten der Gattung *Dermocystidium* (Haplosporidia?)". Zeitschr. Fisch. Hilfswiss., 6 (1-7): 127-34. Berlin, 1957.
- SCHIEMENZ, F. "Ersatz des instinktmässigen Wanderns der Fische in Fischtreppen durch das reflektorische Wandern als Grundlage zum Bau von Fischtreppen, sowie die Orientierung und das Verhalten der Fische in Fischtreppen". Zeitschr. Fisch. Hilfswiss., 6 (1-7): 61-85. Berlin, 1957.
- SCHOFFENIELS, E. "Potassium concentration and potential difference in the single isolated electroplax of the electric eel". Biochim. et Biophys. Acta, 27 (3): 660. London & New York, 1958.
- SCHOLANDER, P. F. "Oxygen dissociation curves in fish blood". Acta Physiologica Scandinavica, 41: 340-44. Stockholm, 1957.
- SCHULTZ, L. P. "The frogfishes of the family Antennariidae". Proc. US Nation. Mus., 107: 47-105. Washington, 1957.
- SHEWAN, J. M., & GEORGALA, D. L. "The effect of spoilage and handling on the bacterial flora of fish". Proc. Nutrit. Soc., 16 (2): 161. Cambridge, 1957.
- SIEBERT, G. "Aktivität Eiweiss spaltender Enzyme in Fischen". Experientia, 14 (2): 65-66. Basel, 1958.
- SILLIMAN, R. P., & GUTSELL, J. S. "Response of laboratory fish populations to fishing rates". Trans. 22nd North American Wildl. Conf.: 464-71. Washington, 1957.
- SPIECKER, D. "Die Galvanotaxis der Fische und ihre Auslösung auf Grund unmittelbarer Irritabilität der Rumpfmuskulatur". Zool. Jahrb., Abt. 3, Allg. Zool. u. Physiol. Tiere, 67 (2): 229-60. Jena, 1957.
- STAHL, A. "Recherches sur les élaborations cellulaires et la neurosécrétion dans l'encéphale des poissons téléostéens". Acta Anat., 31 (Suppl. 38): 1-158. Basel, 1957.
- STEFAN, M. "Physiological analysis of the interrelation between the gas exchange and shoal behaviour of certain marine and fresh water species". Zool. Zhurn., 37 (2): 222-28. Moscow, 1958.
- STEPHENS, R. C., FISHER, R. L., & MILLER, R. G. "Food preferences of California surf fishes with a review of available baits". Trans. 22nd North American Wildl. Conf.: 445-57. Washington, 1957.
- SUYEHIRO, Y., et al. "Movements of the fish in response to sound stimuli with reference to sound-intensity". Japanese J. Ichthyol., 6 (4/5/6): 136-40. Tokyo, 1957.
- SVETOVIDOV, A. N. "Data on the structure of the brain in fish. 2. Structure of the brain of herrings (25 spp. of Clupeinae and related sub-families)". Trudy Inst., Zool. Akad. Nauk SSSR, 21: 368. Moscow, 1955.
- TANAKA, S. "An index to relative size of fish population and effective fishing effort". Bull. Tokai Reg. Fish. Res. Lab., 17: 1-14. Tokyo, 1957.
- THURSTON, C. E. "Sodium and potassium in the edible portions of 34 species of fish". Commerc. Fish. Rev., 20 (1): 1-5. Washington, 1958.
- TIMAKOVA, M. N. "Feeding and food relationships of the navaga and smelt in Onezhsk Bay and White Sea". Materials for a Complex Study of the White Sea, 1: 185-221. Moscow, 1957.



- TSUJITA, T. "Studies on the shoal behaviour of demersal fish in the East China Sea by means of the echosounder. I. An analysis of the echograms taken by the bull-trawlers". Bull. Seikai Reg. Fish. Res. Lab., **14**: 2-5. Nagasaki, 1957.
- TSUKAMOTO, Y., & YOSHINO, S. "A study of the lateral-line system in fish. I. Quantitative analysis of fiber calibers in the lateral-line nerves of fishes". Japanese J. Ichthyol., **6** (3): 59-64. Tokyo, 1957.
- TSUKAMOTO, Y., & YOSHINO, S. "A study of the lateral-line system in fish. II. On the relation between the function of the lateral-line organ and the habits of fish". Japanese J. Ichthyol., **6** (4/5/6): 131-35. Tokyo, 1957.
- UDA, M. "A consideration on the long years tend of the fisheries fluctuation in relation to sea conditions". Bull. Japanese Soc. Sci. Fish., **23** (7 & 8): 368-72. Tokyo, 1957.
- UEDA, K. "Stimulation experiments on fish melanophores". Annot. Zool. Japonenses, **28** (4): 194-205. Tokyo, 1955.
- VISHNIAC, H. S., & NIGRELLI, R. F. "The ability of the Saprolegniaceae to parasitize platyfish". Zoologica, **42** (11): 131-34. New York, 1957.
- WALKER, M. A. "Homogeneity tests on visual pigment solutions from two sea fish". J. Physiol., **133**: 56. London, 1956.
- WEBB, R. T. "Distribution of bluegill treated with tricaine methanesulfonate (M. S. 222)". Progr. Fish-Cult., **20** (2): 69-72. Washington, 1958.
- WESTENBERG, J. "Il meccanismo delle fluttuazioni nelle popolazioni e gli aumenti e diminuzioni della pesca non limitata". Arch. Oceanogr. Limnol., **11** (1): 47-61. Venezia, 1957.
- WITTENBERG, J. B. "The secretion of inert gas into the swim bladder of fish". J. Gen. Physiol., **41**: 783-804. Baltimore, 1958.
- YEATMAN, H. C. "A redescription of two parasitic copepods from Bermuda". J. Washington Acad. Sci., **47** (10): 346-53. Washington, 1957.
- YOSHII, G., WATABE, N., & OKADA, Y. "The uptake of phosphorus-32, sulfur-35, calcium-45, and strontium-89 in the tissues of fish". Nippon Suisangaku Kaishi, **22**: 240-43. Tokyo, 1957.
- YOSHIO, H., & ICHIKAWA, R. "Uptake of strontium by marine fish from the environment". Rec. Oceanogr. Works Japan, NS, **3** (1): 78-84. Tokyo, 1957.

## 7) Shellfish

### 7) a Molluscs

- ABOUL-ELA, I. A. "Effects of ultra-violet radiation on oysters". Nature, **181** (4614): 1013. London, 1958.
- ANDREU, B. "Abundancia estacional de *Polydora* en las rias gallegas y problemas que plantea en el cultivo de la ostra". Inst. Invest. Pesqu., Reunión Product. y Pesqu., **3**: 87-91. Barcelona, 1957.
- ANDREU, B. "Sobre el cultivo del mejillón en Galicia". Inst. Invest. Pesqu., Reunión Product. y Pesqu., **3**: 102-07. Barcelona, 1957.
- ANDREWS, J. D., & MCHUGH, J. L. "The survival and growth of South Carolina seed oysters in Virginia waters". Proc. Nation. Shellf. Assoc., **47**: 3-17. Washington, 1956.
- BERG, K., LUMBYE, J., & OCKELMANN, K. W. "Seasonal and experimental variations of the oxygen consumption of the limpet *Ancylus fluviatilis* (O. F. Müller)". J. Exper. Biol., **35** (1): 43-73. Cambridge, 1958.
- BEVELANDER, G. "Calcification in molluscs: repair and regeneration studies in *Mytilus edulis*". Bull. Mount Desert Island Biol. Lab., **4** (2): 26. Salisbury Cove, Me., 1956.
- DE CASTELLANOS, Z. J. A. "Contribución al conocimiento de las especies de ostras del litoral Argentino (*Ostrea puelchana* y *O. spreta*)". Min. Agric. y Ganaderia, Buenos Aires, 1957.
- CHIBA, K., & OSHIMA, Y. "Effect of suspending particles on the pumping and feeding of marine bivalves, especially of Japanese neck-clam". Bull. Japanese Soc. Sci. Fish., **23** (7 & 8): 348-53. Tokyo, 1957.
- CORBEIL, H.-E. "Contrôle de la toxicité des mollusques". Rapp. Ann. Stat. Biol. Mar. Dépt. Pêch. Québec, 1953: 100-07. Québec, 1954.
- DANALO, A. "Ricerche sugli ovociti in accrescimento di *Mytilicola intestinalis* Steuer (Crost. Cop.)". Atti Soc. Peloritana Sci. Fisic., Mat. e Natur., **4** (1): 23-33. Messina, 1958.

- LE DANTEC, J., & KORRINGA, P. "Oysters and mussels". ICES, Ann. Biol., **13**. Copenhagen, 1958.
- DOWNES, K. M. "An investigation of manganese and zinc in the oyster, *Crassostrea virginica* (Gmelin)". Dissert. Abstr., **17** (11): 2711. Washington, 1957.
- DRINNAN, R. E. "The winter feeding of the oyster-catcher (*Haematopus ostralegus*) on the edible cockle *Cardium edule*". J. Anim. Ecol., **26** (2): 441-69. Oxford, 1957.
- FINGERMAN, M., FAIRBANKS, L. D., & PLAUCHE, W. C. "Body fluid of the oyster *Crassostrea virginica*". Publ. Inst. Mar. Sci., **4** (2): 284-92. Port Aransas, Texas, 1957.
- FOUND, H. R. "The Atlantic oyster industry". Trade News, **10** (6): 3-7. Ottawa, 1957.
- FUJI, A. "Changes in tissue chloride and physiological activity of the brackish-water bivalve, *Corbicula japonica*, in response to variations in salinity". Bull. Fac. Fish. Hokkaido Univ., **8** (3): 163-84. Hakodate, 1957.
- GARDNER, E. A., & WATTS, B. M. "Effect of ionizing radiations on southern oysters". Food Technol., **11** (6): 329. Toledo, Ohio, 1957.
- GIBSON, F. A. "Escallops (*Pecten maximus* L.) in Irish waters". Sci. Proc. Roy. Dublin Soc., **27** (8): 253-70. Dublin, 1956.
- GLUDE, J. B. "Copper, a possible barrier to oyster drills". Proc. Nation. Shellf. Assoc., **47**: 73-82. Washington, 1956.
- GUNTER, G., DAWSON, C. E., & DEMORAN, W. J. "Determination of how long oysters have been dead by studies of their shells". Proc. Nation. Shellf. Assoc., **47**: 31-33. Washington, 1956.
- GUNTER, G., & MENZEL, R. W. "The crown conch, *Melongena corona*, as a predator upon the Virginia oyster". Nautilus, **70** (3): 84-87. Philadelphia, 1957.
- HARGIS, W. J., ARRIGHI, M. F., & WILLIAMS, R. "Some effects of high-frequency x-rays on the oyster drill *Urosalpinx cinerea*". Proc. Nation. Shellf. Assoc., **47**: 68-72. Washington, 1956.
- HENSCHEL, J., & RANKE, B. "Cholesterol metabolism in the mussel *Mytilus edulis*". Arch. Fischereiwiss., **6**: 94-104. Braunschweig, 1955.
- HOPKINS, S. H. "Crabs as predators of oysters in Louisiana". Proc. Nation. Shellf. Assoc., **46**: 177-84. Washington, 1955.
- HOPKINS, S. H. "Our present knowledge of the oyster parasite 'Bucephalus'". Proc. Nation. Shellf. Assoc., **47**: 58-61. Washington, 1956.
- HAVEN, D., & ANDREWS, J. D. "Survival and growth of *Venus mercenaria*, *Venus campechiensis* and their hybrids in suspended trays and on natural bottoms". Proc. Nation. Shellf. Assoc., **47**: 43-49. Washington, 1956.
- LOOSANOFF, V. L. "Some aspects of behavior of oysters at different temperatures". Biol. Bull., **114** (1): 57-70. Lancaster, Pa., 1958.
- LØVERSEN, R. "Forsøk med dyrking av blåskjell". Fiskeridirekt. Småskr., 1957 (4). Bergen, 1957.
- MANNING, J. H. "The Maryland soft shell clam industry and its effects on tide-water resources". Resource Study Rep. Chesapeake Biol. Lab., **11**. Solomons, Maryland, 1957.
- MANNING, J. H., & DUNNINGTON, E. A. "The Maryland soft shell clam fishery: a preliminary investigational report". Resource Study Rep. Chesapeake Biol. Lab., **9**. Solomons, Maryland, 1955.
- MARSHALL, N. "Changes in the physiography of oyster bars in the James River, Virginia". Virginia J. Sci., 1954 (July): 173-81. Charlottesville, 1954.
- MCHUGH, J. L. "Trapping oyster drills in Virginia. III. The catch per trap in relation to condition of bait". Proc. Nation. Shellf. Assoc., **47**: 83-102. Washington, 1956.
- MENZEL, R. W., & HOPKINS, S. H. "Effects of two parasites on the growth of oysters". Proc. Nation. Shellf. Assoc., **45**: 184-86. Washington, 1954.
- MENZEL, R. W. "Some additional differences between *Crassostrea virginica* and *Ostrea equestris* in the Gulf of Mexico area". Proc. Nation. Shellf. Assoc., **46**: 76-81. Washington, 1955.
- SAGARA, J. "Artificial discharge of reproductive elements of certain bivalves caused by treatment of sea water and by injection with NH<sub>4</sub>OH". Bull. Japanese Soc. Sci. Fish., **23** (9): 505-10. Tokyo, 1958.
- SAVILOV, S. I. "Comparison of growth of *Mytilus edulis* in the White and Okhotsk Seas". Trudy Inst. Okeanol., Akad. Nauk SSSR, **11**: 246-57. Moscow, 1954.
- SHAW, B. L., & BATTLE, H. I. "The gross and microscopic anatomy of the digestive tract of the oyster *Crassostrea virginica* (Gmelin)". Canadian J. Zool., **35** (3): 325-47. Ottawa, 1957.

- WARBURTON, F. E. "The effects of boring sponges on oysters". Fish. Res. Board Canada, Progr. Rep. Atlantic Coast Stat., **68**: 3-8. St. Andrews, 1958.
- WOELKE, C. E. "The flatworm *Pseudostylochus ostreophagus* Hyman, a predator of oysters". Proc. Nation. Shellf. Assoc., **47**: 62-67. Washington, 1956.

#### 7) b Crustaceans

- ACKERMANN, D., & LIST, P. H. "Occurrence of trimethylamine oxide, homarin, trigonelline, and a base  $C_4H_9O_2N$  in the shrimp *Crangon vulgaris*". Hoppe-Seylers Zeitschr. Physiol. Chem., **306**: 260-64. Berlin, 1957.
- BUTLER, T. H. "The tagging of the commercial crab in the Queen Charlotte Islands region". Fish. Res. Board Canada, Progr. Rep. Pacific Coast Stat., **109**: 16-19. Nanaimo, 1957.
- DANNEVIG, A. "Lobsters". ICES, Ann. Biol., **13**. Copenhagen, 1958.
- GUEST, W. C. "The Texas shrimp fishery". Bull. Texas Game & Fish Commiss., Ser. 5, **36**. Austin, Texas, 1956.
- KAKIMOTO, D., & KANAZAWA, A. "Studies on the black discoloration of lobster. III. On the control of blackening". Bull. Japanese Soc. Sci. Fish., **23** (7 & 8): 454-57. Tokyo, 1957.
- MARCOTTE, A. "Étiquetage de homard à Miguasha". Rapp. Ann. Stat. Biol. Mar. Dépt. Pêch. Québec, 1953: 136-37. Québec, 1954.
- MISTAKIDIS, M. N. "Comparative fishing trials with shrimp nets 1954-1956". MAFF, Fish. Invest., Ser. 2, **22** (1). London, 1958.
- MONTREUIL, P. "Lobster tagging". Rapp. Ann. Stat. Biol. Mar. Dépt. Pêch. Québec. 1953: 75-86. Québec, 1954.
- MONTREUIL, P. "Statistical records and control of the lobster fishery". Rapp. Ann. Stat. Biol. Mar. Dépt. Pêch. Québec, 1953: 87-92. Québec, 1954.
- NOLTE, W. "Über die Garnelenfischerei an der Nordseeküste". Zeitschr. Fisch. Hilfswiss., **6** (1-7): 145-58. Berlin, 1957.
- OLIVER, M. M. "La gamba (*Parapenaeus longirostris* Lucas) y otros crustáceos comestibles de la región suratlántica". Inst. Invest. Pesqu., Reunión Product. y Pesqu., **3**: 53-59. Barcelona, 1957.
- OLIVER, M. M. "Sobre las pesquerías de crustáceos en aguas profundas de Baleares". Inst. Invest. Pesqu., Reunión Product. y Pesqu., **3**: 60. Barcelona, 1957.
- PRESSON, A. V. "A study of the relationship between the inorganic content of the blood of crayfish and their environment". Dissert. Abstr., **17** (9): 2098. Ann Arbor, Mich., 1957.
- SPRINGER, S. "Shrimp, a new deep-water fishery resource". Trans. 22nd North American Wildl. Conf.: 425-31. Washington, 1957.
- THOMAS, H. J. "Lobster storage". Scottish Home Dept., HMSO, Edinburgh, 1958.

#### 8) Mammals and Reptiles

- BETESHEVA, E. I. "Food of the whalebone whales in the Kurile Islands region". Trudy Inst. Okeanol., Akad. Nauk SSSR, **18**: 78-85. Moscow, 1955.
- BETESHEVA, E. I., & AKIMUSHKIN, I. I. "Food of the spermwhale (*Physeter catodon*) in the Kurile Islands region". Trudy Inst. Okeanol., Akad. Nauk SSSR, **18**: 86-94. Moscow, 1955.
- BONNER, W. "Notes on the southern fur seal in South Georgia". Proc. Zool. Soc. London, **130** (2): 241-52. London, 1958.
- BROWN, S. G. "Whale marks recently recovered". Norsk Hvalf.-Tid., **45**: 661-64. Sandefjord, 1956.
- CHUZAKINA, E. S. "On the breeding cycle of the spermwhale". Trudy Inst. Okeanol., Akad. Nauk SSSR, **18**: 95-99. Moscow, 1955.
- DUNCAN, D. W. "Control of *post-mortem* bacterial spoilage of whales with tetracycline antibiotics". Fish. Res. Board Canada, Progr. Rep. Pacific Coast Stat., **109**: 14-15. Nanaimo, 1957.
- FRIANT, M. "Un stade de l'évolution cérébrale du rorqual (*Balaenoptera musculus* L.)". Hvalråd. Skr., **42**. Oslo, 1958.
- IVANOVA, E. I. "Characteristics of body-proportions in spermwhales (*Physeter catodon*)". Trudy Inst. Okeanol., Akad. Nauk SSSR, **18**: 100-12. Moscow, 1955.
- JOHNSON, A. L. "Seal marking 1956-57". Nature in Wales, **3**: 377-81. 1957.
- JONSGÅRD, Å., & HØIDAL, P. "Strandings of Sowerby's whale (*Mesoplodon bidens*) on the west coast of Norway". Norwegian Whaling Gaz., 1957 (9): 507-12. Sandefjord, 1957.

- JONSGÅRD, Å., RUUD, J. T., & OYNES, P. "Is it desirable and justified to extend the open season for humpback whaling in the Antarctic?" *Norwegian Whaling Gaz.*, 1957 (4): 160-77. Sandefjord, 1957.
- KENYON, K. W. "The sea otter". *Oryx*, 4 (3). London, 1957.
- KLUMOV, S. K. "On the local stocks of whales". *Trudy Inst. Okeanol., Akad. Nauk SSSR*, 18: 7-27. Moscow, 1955.
- KLUMOV, S. K. "The future of whales". *Priroda*, 1958 (3): 36. Moscow, 1958.
- DE KOCK, L. L. "The pilot whale stranding on the Orkney Island of Westray 1955". *Scottish Natur.*, 68: 63-70. Edinburgh, 1956.
- LAWS, R. M. "On the growth rates of the leopard seal, *Hydrurga leptonyx* (De Blainville, 1820)". *Säugetierkundliche Mitt.*, 5 (2): 49-55. Stuttgart, 1957.
- LAWS, R. M. "Growth rates and ages of crabeater seals, *Lobodon carcinophagus* Jacquinot & Pucheran". *Proc. Zool. Soc. London*, 130 (2): 275-88. London, 1958.
- LOPEZ-NEYRA, C. R. "Sobre unos vermes parasitos obtenidos en el *Ziphius cavirostris* Cuvier (Cetaceo, Denticeto) varado en Almeria, en especial de *Crassicauda giliakiana* (Spiruroidea, Tetrameridae)". *Rev. Iberica Parasitol.*, 18 (1): 13-18. Madrid, 1958.
- MCLAREN, I. A. "Some aspects of growth and reproduction of the bearded seal, *Erignathus barbatus* (Erleben)". *J. Fish. Res. Board Canada*, 15 (2): 219-27. Ottawa, 1958.
- PIKE, C., & MAXWELL, B. E. "The abundance and distribution of the northern sea lion (*Eumetopias jubata*) on the coast of British Columbia". *J. Fish. Res. Board Canada*, 15 (1): 5-17. Ottawa, 1958.
- ROPELEWSKI, A. "The common porpoise (*Phocaena phocaena* L.) as a by-catch in the Polish Baltic fisheries". *Rep. Sea Fish. Inst. Gdynia*, 9: 427-37. Gdynia, 1957.
- SALNIKOV, N. E. "Some problems of the reproductive biology of the fin whale and blue whale in the Antarctic". *Trudy Baltiro*, 2: 75-89. Kaliningrad, 1956.
- SCHOFFER, V. B. "Seals, sea lions and walruses. A review of the Pinnipedia". Stanford Univ. Press, California, 1958.
- SCOTT, D. M., & FISHER, H. D. "Incidence of a parasitic ascarid, *Porrocaecum decipiens*, in the common porpoise, *Phocaena phocaena*, from the Lower Bay of Fundy". *J. Fish. Res. Board Canada*, 15 (1): 1-4. Ottawa, 1958.
- SLEPZOV, M. M. "Some peculiarities in the development of the early embryonic stages of cetaceans". *Trudy Inst. Okeanol., Akad. Nauk SSSR*, 18: 48-59. Moscow, 1955.
- SLEPZOV, M. M. "Whale marking in 1954". *Trudy Inst. Okeanol., Akad. Nauk SSSR*, 18: 134-41. Moscow, 1955.
- SLIJPER, E. J. "On sounds emitted by dolphins". *Arch. Néerlandaises Zool.*, 11 (4): 529. Leiden, 1956.
- TOMILIN, A. G. "On the behaviour and sonic signalling in cetaceans". *Trudy Inst. Okeanol., Akad. Nauk SSSR*, 18: 28-47. Moscow, 1955.
- ZEMSKIY, V. A. "Methods of establishing traces of corpora lutea in ovaries of female baleen whales". *Bull. Moscow Soc. Natur., N. S., Biol.*, 61 (6): 5-13. Moscow, 1956.

## 9) Miscellaneous

### 9) a Mathematical and Statistical Methods

- VON BERTALANFFY, L. "Quantitative laws in metabolism and growth". *Quart. Rev. Biol.* 1957. Baltimore, 1957.
- CARLANDER, K. D. "Some simple mathematical models as aids in interpreting the effect of fishing". *Iowa State College J. Sci.*, 32 (3): 395-418. Ames, 1958.
- GULLAND, J. A. "Sampling problems and methods in fisheries research". *FAO Fish. Bull.*, 10 (4): 157-81. Rome, 1957.

### 9) b General

- ANDERSON, A. E., JONAS, E. C., & ODUM, H. T. "Alteration of clay minerals by digestive processes of marine organisms". *Science*, 127 (3291): 190-91. Lancaster, Pa., 1958.
- BOROUGHES, H. A., CHIPMAN, W. A., & RICE, T. R. "Laboratory experiments on the uptake, accumulation, and loss of radionuclides by marine organisms". *Publ. Nation. Acad. Sci., Nation. Res. Council.*, 551: 80-87. Washington, 1957.
- DONALDSON, L. R., & FOSTER, R. F. "Effects of radiation on aquatic organisms". *Publ. Nation. Acad. Sci., Nation. Res. Council.*, 551: 96-102. Washington, 1957.
- HEDGPETH, J. W., *et al.* "Treatise on marine ecology and paleoecology". *Mem. Geol. Soc. America*, 67. Washington, 1957.

- KRUMHOLZ, L. A., GOLDBERG, E. D., & BOROUGHS, H. A. "Ecological factors involved in the uptake, accumulation, and loss of radionuclides by aquatic organisms". *Publ. Nation. Acad. Sci., Nation. Res. Counc.*, **551**: 69-79. Washington, 1957.
- REVELLE, R., & SCHAEFER, M. B. "General considerations concerning the ocean as a receptacle for artificially radioactive materials". *Publ. Nation. Acad. Sci., Nation. Res. Counc.*, **551**: 1-25. Washington, 1957.
- SEGERSTRÅLE, S. G. "A quarter century of brackish-water research". *Verh. Internat. Verein. Theoret. u. Angew. Limnol.*, **13**: 646-71. Stuttgart, 1958.
